# Supplementary material for: Intraspecific variation and phylogeography of the millipede model organism, the Black Pill Millipede Glomerismarginata (Villers, 1789) (Diplopoda, Glomerida, Glomeridae)
Source: Zookeys. 2018 Mar 7;741:93–131. doi: 10.3897/zookeys.741.21917 (PMC5904428; doi:10.3897/zookeys.741.21917)
Supplement: Supplementary material 3 [file zookeys-741-093-s003.xls]

## Sheet: Coordinates
	NameFull	Lat	Lon
	G.mar.01_DE.MGSO_GBOL33714	51.7429	10.7672
	G.mar.02_DE.MGSO_ZFMK100409275	51.7435	10.7673
	G.mar.03_DE.MGSO_ZFMK1634	51.841	10.326
	G.mar.04_DE.MGSO_ZFMK1909	50.8953	11.7527
	G.mar.05_DE.MGSO_ZFMK19531	50.8953	11.7527
	G.mar.06_DE.MGSO_ZFMK2503693	50.9194	11.5479
	G.mar.07_DE.MGSO_ZFMK2503694	50.9194	11.5479
	G.mar.08_DE.MGSO_ZFMK2542470	50.892	11.8209
	G.mar.09_DE.MGSO_ZFMK2542471	50.892	11.8209
	G.mar.10_DE.MGSO_ZFMK2542541	51.133	11.7487
	G.mar.11_DE.MGSO_ZFMK2542542	51.133	11.7487
	G.mar.12_DE.MGSW_ZFMK18967	50.6627	7.1026
	G.mar.13_DE.MGSW_ZFMK18987	50.6659	7.2156
	G.mar.14_DE.MGSW_ZFMK18988	50.6867	7.2997
	G.mar.15_DE.MGSW_ZFMK18991	50.7667	7.3667
	G.mar.16_DE.MGSW_ZFMK19003	51.361	7.5499
	G.mar.17_DE.MGSW_ZFMK19005	51.361	7.5499
	G.mar.18_DE.MGSW_ZFMK19029	50.56	6.8078
	G.mar.19_DE.MGSW_ZFMK19031	51.2299	7.054
	G.mar.20_DE.MGSW_ZFMK19044	50.8026	7.2418
	G.mar.21_DE.MGSW_ZFMK19045	51.3589	7.1697
	G.mar.22_DE.MGSW_ZFMK19046	51.2299	7.054
	G.mar.23_DE.MGSW_ZFMK19047	50.714	7.1772
	G.mar.24_DE.MGSW_ZFMK19048	50.6715	7.0469
	G.mar.25_DE.MGSW_ZFMK19049	51.291	7.2522
	G.mar.26_DE.MGSW_ZFMK19051	50.5511	7.1722
	G.mar.27_DE.MGSW_ZFMK19054	50.4647	7.2225
	G.mar.28_DE.MGSW_ZFMK19057	51.361	7.5499
	G.mar.29_DE.MGSW_ZFMK19539	50.6319	6.4731
	G.mar.30_DE.MGSW_ZFMK19550	50.7797	8.0085
	G.mar.31_DE.MGSW_ZFMK19555	50.7797	8.0085
	G.mar.32_DE.MGSW_ZFMK19558	50.7093	7.7132
	G.mar.33_DE.MGSW_ZFMK19560	50.7093	7.7132
	G.mar.34_DE.MGSW_ZFMK19561	50.7093	7.7132
	G.mar.35_DE.MGSW_ZFMK2516208	50.6245	7.1936
	G.mar.36_DE.MGSW_ZFMK2516209	50.6245	7.1936
	G.mar.37_DE.MGSW_ZFMK2557907	51.1821	10.2208
	G.mar.38_DE.MGSW_ZFMK2557908	51.1821	10.2208
	G.mar.39_DE.NDTO_ZFMK100409283	53.9192	10.0977
	G.mar.40_DE.NDTO_ZFMK2538190	54.303	10.756
	G.mar.41_DE.NDTO_ZFMK2538253	53.124	13.884
	G.mar.42_DE.NDTO_ZFMK2553394	53.6525	11.4369
	G.mar.43_DE.NDTO_ZFMK2553395	53.6525	11.4369
	G.mar.44_DE.NDTO_ZFMK2553405	53.2794	12.0768
	G.mar.45_DE.NDTW_ZFMK100409272	52.9604	9.8927
	G.mar.46_DE.NDTW_ZFMK19472	51.4423	7.2665
	G.mar.47_DE.SSL_ZFMK100409123	49.9826	9.7681
	G.mar.48_DE.SSL_ZFMK100409296	49.8641	9.8573
	G.mar.49_ES.CC_ZFMK1861	42.4298	-2.56196
	G.mar.50_ES.CC_ZFMK1863	43.2338	-1.63782
	G.mar.51_ES.CC_ZFMK1893	43.2338	-1.63782
	G.mar.52_ES.PYRS_ZFMK2517202	41.3155	1.10444
	G.mar.53_FR.ALP_BGI12GEU183	45.2731	5.76573
	G.mar.54_FR.ALP_ZFMK2517217	45.0707	6.00764
	G.mar.55_FR.ATLN_ZFMK2553457	48.2014	0.1711
	G.mar.56_FR.ATLN_TW163	48.2297	-0.2422
	G.mar.57_FR.ATLN_TW164	47.2611	0.3256
	G.mar.58_FR.CONN_ZFMK100410157	47.8123	7.0651
	G.mar.59_FR.CONN_ZFMK18996	49.4611	6.36444
	G.mar.60_FR.CONN_ZFMK2517315	47.8591	6.4036
	G.mar.61_FR.CONN_ZFMK2517322	47.8387	6.6671
	G.mar.62_FR.CONN_TW161	47.8387	6.6671
	G.mar.63_FR.CONN_TW162	47.8167	6.8736
	G.mar.64_FR.CONS_ZFMK2517209	45.2346	1.54536
	G.mar.65_FR.MED_ZFMK18977	44.1144	5.2414
	G.mar.66_FR.MED_ZFMK19021	44.1144	5.2414
	G.mar.67_FR.MED_ZFMK19037	44.1144	5.2414
	G.mar.68_FR.MED_ZFMK2516203	44.551	4.949
	G.mar.69_FR.MED_ZFMK2517213	43.4937	5.52094
	G.mar.70_FR.MED_ZFMK2517214	43.4639	5.79964
	G.mar.71_FR.MED_ZFMK2517215	43.2315	6.23378
	G.mar.72_FR.MED_ZFMK2517216	43.9742	7.31104
	G.mar.73_FR.MED_ZFMKTW102	44.2967	4.15198
	G.mar.74_FR.MED_TW165	43.589	6.775
	G.mar.75_FR.MED_TW166	43.589	6.775
	G.mar.76_FR.PYRN_ZFMK2517199	42.4123	2.56617
	G.mar.77_FR.PYRN_ZFMK2517210	42.9967	1.0101
	G.mar.78_FR.PYRN_ZFMK2517211	43.0167	0.48049
	G.mar.79_FR.PYRN_ZFMK2517212	42.3753	2.45646
	G.mar.80_GB.EM_ZFMK19038	51.75	-0.75
	G.mar.81_FR.ATLN_BOLDECHUB974	49.5	1.1
	G.mar.82_FR.ATLN_BOLDECHUB975	49.5	1.1
	G.mar.83_FR.ATLN_BOLDECHUB978	49.5	1.1
	G.mar.84_FR.ATLN_BOLDECHUB979	49.5	1.1
	G.mar.85_FR.ATLN_BOLDGENHP020	49.4342	0.713709
	G.mar.86_FR.ATLN_BOLDGENHP021	49.4342	0.713709
	G.mar.87_FR.ATLN_BOLDGENHP022	49.4342	0.713709
	G.mar.88_FR.ATLN_BOLDGENHP023	49.4342	0.713709
	G.mar.89_FR.ATLN_BOLDGENHP024	49.4342	0.713709
	G.mar.90_FR.ATLN_BOLDGENHP025	49.4342	0.713709
	G.mar.91_FR.ATLN_BOLDGENHP317	49.4804	0.954274
	G.mar.92_DE.MGSW_GBFJ409909	50.692	7.1
	G.mar.93_DE.MGSW_GBHM888107	50.619	7.254
	G.mar.94_DE.MGSW_GBHM888108	50.56	6.808
	G.mar.95_DE.MGSW_GBHM888109	50.619	7.254
	G.mar.96_DE.SSL_GBHQ966136	49.392	8.158
	G.mar.97_ES.CC_GBJQ350444	42.83	-2.1

## Sheet: MatrixOutput
	Species_1	Species_2	Lat-Species 1	Lon-Species 1	Lat-Species 2	Lon-Species 2	geo-Dist	p-Dist
	G.mar.01_DE.MGSO_GBOL33714	G.mar.02_DE.MGSO_ZFMK100409275	51.7429	10.7672	51.7435	10.7673	0.0670291	0.0106545
	G.mar.01_DE.MGSO_GBOL33714	G.mar.03_DE.MGSO_ZFMK1634	51.7429	10.7672	51.841	10.326	32.2248	0.0106545
	G.mar.02_DE.MGSO_ZFMK100409275	G.mar.03_DE.MGSO_ZFMK1634	51.7435	10.7673	51.841	10.326	32.2086	0
	G.mar.01_DE.MGSO_GBOL33714	G.mar.04_DE.MGSO_ZFMK1909	51.7429	10.7672	50.8953	11.7527	116.429	0.00152207
	G.mar.02_DE.MGSO_ZFMK100409275	G.mar.04_DE.MGSO_ZFMK1909	51.7435	10.7673	50.8953	11.7527	116.479	0.00913242
	G.mar.03_DE.MGSO_ZFMK1634	G.mar.04_DE.MGSO_ZFMK1909	51.841	10.326	50.8953	11.7527	144.359	0.00913242
	G.mar.01_DE.MGSO_GBOL33714	G.mar.05_DE.MGSO_ZFMK19531	51.7429	10.7672	50.8953	11.7527	116.429	0.00152207
	G.mar.02_DE.MGSO_ZFMK100409275	G.mar.05_DE.MGSO_ZFMK19531	51.7435	10.7673	50.8953	11.7527	116.479	0.00913242
	G.mar.03_DE.MGSO_ZFMK1634	G.mar.05_DE.MGSO_ZFMK19531	51.841	10.326	50.8953	11.7527	144.359	0.00913242
	G.mar.04_DE.MGSO_ZFMK1909	G.mar.05_DE.MGSO_ZFMK19531	50.8953	11.7527	50.8953	11.7527	0	0
	G.mar.01_DE.MGSO_GBOL33714	G.mar.06_DE.MGSO_ZFMK2503693	51.7429	10.7672	50.9194	11.5479	106.36	0.00152207
	G.mar.02_DE.MGSO_ZFMK100409275	G.mar.06_DE.MGSO_ZFMK2503693	51.7435	10.7673	50.9194	11.5479	106.413	0.00913242
	G.mar.03_DE.MGSO_ZFMK1634	G.mar.06_DE.MGSO_ZFMK2503693	51.841	10.326	50.9194	11.5479	132.928	0.00913242
	G.mar.04_DE.MGSO_ZFMK1909	G.mar.06_DE.MGSO_ZFMK2503693	50.8953	11.7527	50.9194	11.5479	14.5987	0
	G.mar.05_DE.MGSO_ZFMK19531	G.mar.06_DE.MGSO_ZFMK2503693	50.8953	11.7527	50.9194	11.5479	14.5987	0
	G.mar.01_DE.MGSO_GBOL33714	G.mar.07_DE.MGSO_ZFMK2503694	51.7429	10.7672	50.9194	11.5479	106.36	0.00152207
	G.mar.02_DE.MGSO_ZFMK100409275	G.mar.07_DE.MGSO_ZFMK2503694	51.7435	10.7673	50.9194	11.5479	106.413	0.00913242
	G.mar.03_DE.MGSO_ZFMK1634	G.mar.07_DE.MGSO_ZFMK2503694	51.841	10.326	50.9194	11.5479	132.928	0.00913242
	G.mar.04_DE.MGSO_ZFMK1909	G.mar.07_DE.MGSO_ZFMK2503694	50.8953	11.7527	50.9194	11.5479	14.5987	0
	G.mar.05_DE.MGSO_ZFMK19531	G.mar.07_DE.MGSO_ZFMK2503694	50.8953	11.7527	50.9194	11.5479	14.5987	0
	G.mar.06_DE.MGSO_ZFMK2503693	G.mar.07_DE.MGSO_ZFMK2503694	50.9194	11.5479	50.9194	11.5479	0	0
	G.mar.01_DE.MGSO_GBOL33714	G.mar.08_DE.MGSO_ZFMK2542470	51.7429	10.7672	50.892	11.8209	119.566	0.00152207
	G.mar.02_DE.MGSO_ZFMK100409275	G.mar.08_DE.MGSO_ZFMK2542470	51.7435	10.7673	50.892	11.8209	119.614	0.00913242
	G.mar.03_DE.MGSO_ZFMK1634	G.mar.08_DE.MGSO_ZFMK2542470	51.841	10.326	50.892	11.8209	147.907	0.00913242
	G.mar.04_DE.MGSO_ZFMK1909	G.mar.08_DE.MGSO_ZFMK2542470	50.8953	11.7527	50.892	11.8209	4.79442	0
	G.mar.05_DE.MGSO_ZFMK19531	G.mar.08_DE.MGSO_ZFMK2542470	50.8953	11.7527	50.892	11.8209	4.79442	0
	G.mar.06_DE.MGSO_ZFMK2503693	G.mar.08_DE.MGSO_ZFMK2542470	50.9194	11.5479	50.892	11.8209	19.3713	0
	G.mar.07_DE.MGSO_ZFMK2503694	G.mar.08_DE.MGSO_ZFMK2542470	50.9194	11.5479	50.892	11.8209	19.3713	0
	G.mar.01_DE.MGSO_GBOL33714	G.mar.09_DE.MGSO_ZFMK2542471	51.7429	10.7672	50.892	11.8209	119.566	0.00304414
	G.mar.02_DE.MGSO_ZFMK100409275	G.mar.09_DE.MGSO_ZFMK2542471	51.7435	10.7673	50.892	11.8209	119.614	0.0106545
	G.mar.03_DE.MGSO_ZFMK1634	G.mar.09_DE.MGSO_ZFMK2542471	51.841	10.326	50.892	11.8209	147.907	0.0106545
	G.mar.04_DE.MGSO_ZFMK1909	G.mar.09_DE.MGSO_ZFMK2542471	50.8953	11.7527	50.892	11.8209	4.79442	0.00152207
	G.mar.05_DE.MGSO_ZFMK19531	G.mar.09_DE.MGSO_ZFMK2542471	50.8953	11.7527	50.892	11.8209	4.79442	0.00152207
	G.mar.06_DE.MGSO_ZFMK2503693	G.mar.09_DE.MGSO_ZFMK2542471	50.9194	11.5479	50.892	11.8209	19.3713	0.00152207
	G.mar.07_DE.MGSO_ZFMK2503694	G.mar.09_DE.MGSO_ZFMK2542471	50.9194	11.5479	50.892	11.8209	19.3713	0.00152207
	G.mar.08_DE.MGSO_ZFMK2542470	G.mar.09_DE.MGSO_ZFMK2542471	50.892	11.8209	50.892	11.8209	0	0.00152207
	G.mar.01_DE.MGSO_GBOL33714	G.mar.10_DE.MGSO_ZFMK2542541	51.7429	10.7672	51.133	11.7487	95.9987	0.00152207
	G.mar.02_DE.MGSO_ZFMK100409275	G.mar.10_DE.MGSO_ZFMK2542541	51.7435	10.7673	51.133	11.7487	96.0406	0.00913242
	G.mar.03_DE.MGSO_ZFMK1634	G.mar.10_DE.MGSO_ZFMK2542541	51.841	10.326	51.133	11.7487	126.018	0.00913242
	G.mar.04_DE.MGSO_ZFMK1909	G.mar.10_DE.MGSO_ZFMK2542541	50.8953	11.7527	51.133	11.7487	26.4159	0
	G.mar.05_DE.MGSO_ZFMK19531	G.mar.10_DE.MGSO_ZFMK2542541	50.8953	11.7527	51.133	11.7487	26.4159	0
	G.mar.06_DE.MGSO_ZFMK2503693	G.mar.10_DE.MGSO_ZFMK2542541	50.9194	11.5479	51.133	11.7487	27.5751	0
	G.mar.07_DE.MGSO_ZFMK2503694	G.mar.10_DE.MGSO_ZFMK2542541	50.9194	11.5479	51.133	11.7487	27.5751	0
	G.mar.08_DE.MGSO_ZFMK2542470	G.mar.10_DE.MGSO_ZFMK2542541	50.892	11.8209	51.133	11.7487	27.2527	0
	G.mar.09_DE.MGSO_ZFMK2542471	G.mar.10_DE.MGSO_ZFMK2542541	50.892	11.8209	51.133	11.7487	27.2527	0.00152207
	G.mar.01_DE.MGSO_GBOL33714	G.mar.11_DE.MGSO_ZFMK2542542	51.7429	10.7672	51.133	11.7487	95.9987	0.00152207
	G.mar.02_DE.MGSO_ZFMK100409275	G.mar.11_DE.MGSO_ZFMK2542542	51.7435	10.7673	51.133	11.7487	96.0406	0.00913242
	G.mar.03_DE.MGSO_ZFMK1634	G.mar.11_DE.MGSO_ZFMK2542542	51.841	10.326	51.133	11.7487	126.018	0.00913242
	G.mar.04_DE.MGSO_ZFMK1909	G.mar.11_DE.MGSO_ZFMK2542542	50.8953	11.7527	51.133	11.7487	26.4159	0
	G.mar.05_DE.MGSO_ZFMK19531	G.mar.11_DE.MGSO_ZFMK2542542	50.8953	11.7527	51.133	11.7487	26.4159	0
	G.mar.06_DE.MGSO_ZFMK2503693	G.mar.11_DE.MGSO_ZFMK2542542	50.9194	11.5479	51.133	11.7487	27.5751	0
	G.mar.07_DE.MGSO_ZFMK2503694	G.mar.11_DE.MGSO_ZFMK2542542	50.9194	11.5479	51.133	11.7487	27.5751	0
	G.mar.08_DE.MGSO_ZFMK2542470	G.mar.11_DE.MGSO_ZFMK2542542	50.892	11.8209	51.133	11.7487	27.2527	0
	G.mar.09_DE.MGSO_ZFMK2542471	G.mar.11_DE.MGSO_ZFMK2542542	50.892	11.8209	51.133	11.7487	27.2527	0.00152207
	G.mar.10_DE.MGSO_ZFMK2542541	G.mar.11_DE.MGSO_ZFMK2542542	51.133	11.7487	51.133	11.7487	0	0
	G.mar.01_DE.MGSO_GBOL33714	G.mar.12_DE.MGSW_ZFMK18967	51.7429	10.7672	50.6627	7.1026	281.938	0.0106545
	G.mar.02_DE.MGSO_ZFMK100409275	G.mar.12_DE.MGSW_ZFMK18967	51.7435	10.7673	50.6627	7.1026	281.971	0
	G.mar.03_DE.MGSO_ZFMK1634	G.mar.12_DE.MGSW_ZFMK18967	51.841	10.326	50.6627	7.1026	259.598	0
	G.mar.04_DE.MGSO_ZFMK1909	G.mar.12_DE.MGSW_ZFMK18967	50.8953	11.7527	50.6627	7.1026	327.709	0.00913242
	G.mar.05_DE.MGSO_ZFMK19531	G.mar.12_DE.MGSW_ZFMK18967	50.8953	11.7527	50.6627	7.1026	327.709	0.00913242
	G.mar.06_DE.MGSO_ZFMK2503693	G.mar.12_DE.MGSW_ZFMK18967	50.9194	11.5479	50.6627	7.1026	313.524	0.00913242
	G.mar.07_DE.MGSO_ZFMK2503694	G.mar.12_DE.MGSW_ZFMK18967	50.9194	11.5479	50.6627	7.1026	313.524	0.00913242
	G.mar.08_DE.MGSO_ZFMK2542470	G.mar.12_DE.MGSW_ZFMK18967	50.892	11.8209	50.6627	7.1026	332.468	0.00913242
	G.mar.09_DE.MGSO_ZFMK2542471	G.mar.12_DE.MGSW_ZFMK18967	50.892	11.8209	50.6627	7.1026	332.468	0.0106545
	G.mar.10_DE.MGSO_ZFMK2542541	G.mar.12_DE.MGSW_ZFMK18967	51.133	11.7487	50.6627	7.1026	329.741	0.00913242
	G.mar.11_DE.MGSO_ZFMK2542542	G.mar.12_DE.MGSW_ZFMK18967	51.133	11.7487	50.6627	7.1026	329.741	0.00913242
	G.mar.01_DE.MGSO_GBOL33714	G.mar.13_DE.MGSW_ZFMK18987	51.7429	10.7672	50.6659	7.2156	274.679	0.0106545
	G.mar.02_DE.MGSO_ZFMK100409275	G.mar.13_DE.MGSW_ZFMK18987	51.7435	10.7673	50.6659	7.2156	274.713	0
	G.mar.03_DE.MGSO_ZFMK1634	G.mar.13_DE.MGSW_ZFMK18987	51.841	10.326	50.6659	7.2156	252.655	0
	G.mar.04_DE.MGSO_ZFMK1909	G.mar.13_DE.MGSW_ZFMK18987	50.8953	11.7527	50.6659	7.2156	319.759	0.00913242
	G.mar.05_DE.MGSO_ZFMK19531	G.mar.13_DE.MGSW_ZFMK18987	50.8953	11.7527	50.6659	7.2156	319.759	0.00913242
	G.mar.06_DE.MGSO_ZFMK2503693	G.mar.13_DE.MGSW_ZFMK18987	50.9194	11.5479	50.6659	7.2156	305.58	0.00913242
	G.mar.07_DE.MGSO_ZFMK2503694	G.mar.13_DE.MGSW_ZFMK18987	50.9194	11.5479	50.6659	7.2156	305.58	0.00913242
	G.mar.08_DE.MGSO_ZFMK2542470	G.mar.13_DE.MGSW_ZFMK18987	50.892	11.8209	50.6659	7.2156	324.517	0.00913242
	G.mar.09_DE.MGSO_ZFMK2542471	G.mar.13_DE.MGSW_ZFMK18987	50.892	11.8209	50.6659	7.2156	324.517	0.0106545
	G.mar.10_DE.MGSO_ZFMK2542541	G.mar.13_DE.MGSW_ZFMK18987	51.133	11.7487	50.6659	7.2156	321.859	0.00913242
	G.mar.11_DE.MGSO_ZFMK2542542	G.mar.13_DE.MGSW_ZFMK18987	51.133	11.7487	50.6659	7.2156	321.859	0.00913242
	G.mar.12_DE.MGSW_ZFMK18967	G.mar.13_DE.MGSW_ZFMK18987	50.6627	7.1026	50.6659	7.2156	7.96744	0
	G.mar.01_DE.MGSO_GBOL33714	G.mar.14_DE.MGSW_ZFMK18988	51.7429	10.7672	50.6867	7.2997	268.356	0.0121766
	G.mar.02_DE.MGSO_ZFMK100409275	G.mar.14_DE.MGSW_ZFMK18988	51.7435	10.7673	50.6867	7.2997	268.39	0.00152207
	G.mar.03_DE.MGSO_ZFMK1634	G.mar.14_DE.MGSW_ZFMK18988	51.841	10.326	50.6867	7.2997	246.416	0.00152207
	G.mar.04_DE.MGSO_ZFMK1909	G.mar.14_DE.MGSW_ZFMK18988	50.8953	11.7527	50.6867	7.2997	313.623	0.0106545
	G.mar.05_DE.MGSO_ZFMK19531	G.mar.14_DE.MGSW_ZFMK18988	50.8953	11.7527	50.6867	7.2997	313.623	0.0106545
	G.mar.06_DE.MGSO_ZFMK2503693	G.mar.14_DE.MGSW_ZFMK18988	50.9194	11.5479	50.6867	7.2997	299.427	0.0106545
	G.mar.07_DE.MGSO_ZFMK2503694	G.mar.14_DE.MGSW_ZFMK18988	50.9194	11.5479	50.6867	7.2997	299.427	0.0106545
	G.mar.08_DE.MGSO_ZFMK2542470	G.mar.14_DE.MGSW_ZFMK18988	50.892	11.8209	50.6867	7.2997	318.384	0.0106545
	G.mar.09_DE.MGSO_ZFMK2542471	G.mar.14_DE.MGSW_ZFMK18988	50.892	11.8209	50.6867	7.2997	318.384	0.0121766
	G.mar.10_DE.MGSO_ZFMK2542541	G.mar.14_DE.MGSW_ZFMK18988	51.133	11.7487	50.6867	7.2997	315.607	0.0106545
	G.mar.11_DE.MGSO_ZFMK2542542	G.mar.14_DE.MGSW_ZFMK18988	51.133	11.7487	50.6867	7.2997	315.607	0.0106545
	G.mar.12_DE.MGSW_ZFMK18967	G.mar.14_DE.MGSW_ZFMK18988	50.6627	7.1026	50.6867	7.2997	14.1342	0.00152207
	G.mar.13_DE.MGSW_ZFMK18987	G.mar.14_DE.MGSW_ZFMK18988	50.6659	7.2156	50.6867	7.2997	6.3574	0.00152207
	G.mar.01_DE.MGSO_GBOL33714	G.mar.15_DE.MGSW_ZFMK18991	51.7429	10.7672	50.7667	7.3667	260.159	0.0121766
	G.mar.02_DE.MGSO_ZFMK100409275	G.mar.15_DE.MGSW_ZFMK18991	51.7435	10.7673	50.7667	7.3667	260.191	0.00152207
	G.mar.03_DE.MGSO_ZFMK1634	G.mar.15_DE.MGSW_ZFMK18991	51.841	10.326	50.7667	7.3667	237.716	0.00152207
	G.mar.04_DE.MGSO_ZFMK1909	G.mar.15_DE.MGSW_ZFMK18991	50.8953	11.7527	50.7667	7.3667	308.129	0.0106545
	G.mar.05_DE.MGSO_ZFMK19531	G.mar.15_DE.MGSW_ZFMK18991	50.8953	11.7527	50.7667	7.3667	308.129	0.0106545
	G.mar.06_DE.MGSO_ZFMK2503693	G.mar.15_DE.MGSW_ZFMK18991	50.9194	11.5479	50.7667	7.3667	293.844	0.0106545
	G.mar.07_DE.MGSO_ZFMK2503694	G.mar.15_DE.MGSW_ZFMK18991	50.9194	11.5479	50.7667	7.3667	293.844	0.0106545
	G.mar.08_DE.MGSO_ZFMK2542470	G.mar.15_DE.MGSW_ZFMK18991	50.892	11.8209	50.7667	7.3667	312.903	0.0106545
	G.mar.09_DE.MGSO_ZFMK2542471	G.mar.15_DE.MGSW_ZFMK18991	50.892	11.8209	50.7667	7.3667	312.903	0.0121766
	G.mar.10_DE.MGSO_ZFMK2542541	G.mar.15_DE.MGSW_ZFMK18991	51.133	11.7487	50.7667	7.3667	309.42	0.0106545
	G.mar.11_DE.MGSO_ZFMK2542542	G.mar.15_DE.MGSW_ZFMK18991	51.133	11.7487	50.7667	7.3667	309.42	0.0106545
	G.mar.12_DE.MGSW_ZFMK18967	G.mar.15_DE.MGSW_ZFMK18991	50.6627	7.1026	50.7667	7.3667	21.8834	0.00152207
	G.mar.13_DE.MGSW_ZFMK18987	G.mar.15_DE.MGSW_ZFMK18991	50.6659	7.2156	50.7667	7.3667	15.4434	0.00152207
	G.mar.14_DE.MGSW_ZFMK18988	G.mar.15_DE.MGSW_ZFMK18991	50.6867	7.2997	50.7667	7.3667	10.0621	0.00304414
	G.mar.01_DE.MGSO_GBOL33714	G.mar.16_DE.MGSW_ZFMK19003	51.7429	10.7672	51.361	7.5499	226.304	0.0121766
	G.mar.02_DE.MGSO_ZFMK100409275	G.mar.16_DE.MGSW_ZFMK19003	51.7435	10.7673	51.361	7.5499	226.322	0.00152207
	G.mar.03_DE.MGSO_ZFMK1634	G.mar.16_DE.MGSW_ZFMK19003	51.841	10.326	51.361	7.5499	198.888	0.00152207
	G.mar.04_DE.MGSO_ZFMK1909	G.mar.16_DE.MGSW_ZFMK19003	50.8953	11.7527	51.361	7.5499	297.593	0.0106545
	G.mar.05_DE.MGSO_ZFMK19531	G.mar.16_DE.MGSW_ZFMK19003	50.8953	11.7527	51.361	7.5499	297.593	0.0106545
	G.mar.06_DE.MGSO_ZFMK2503693	G.mar.16_DE.MGSW_ZFMK19003	50.9194	11.5479	51.361	7.5499	282.997	0.0106545
	G.mar.07_DE.MGSO_ZFMK2503694	G.mar.16_DE.MGSW_ZFMK19003	50.9194	11.5479	51.361	7.5499	282.997	0.0106545
	G.mar.08_DE.MGSO_ZFMK2542470	G.mar.16_DE.MGSW_ZFMK19003	50.892	11.8209	51.361	7.5499	302.349	0.0106545
	G.mar.09_DE.MGSO_ZFMK2542471	G.mar.16_DE.MGSW_ZFMK19003	50.892	11.8209	51.361	7.5499	302.349	0.0121766
	G.mar.10_DE.MGSO_ZFMK2542541	G.mar.16_DE.MGSW_ZFMK19003	51.133	11.7487	51.361	7.5499	293.126	0.0106545
	G.mar.11_DE.MGSO_ZFMK2542542	G.mar.16_DE.MGSW_ZFMK19003	51.133	11.7487	51.361	7.5499	293.126	0.0106545
	G.mar.12_DE.MGSW_ZFMK18967	G.mar.16_DE.MGSW_ZFMK19003	50.6627	7.1026	51.361	7.5499	83.663	0.00152207
	G.mar.13_DE.MGSW_ZFMK18987	G.mar.16_DE.MGSW_ZFMK19003	50.6659	7.2156	51.361	7.5499	80.7013	0.00152207
	G.mar.14_DE.MGSW_ZFMK18988	G.mar.16_DE.MGSW_ZFMK19003	50.6867	7.2997	51.361	7.5499	76.9453	0.00304414
	G.mar.15_DE.MGSW_ZFMK18991	G.mar.16_DE.MGSW_ZFMK19003	50.7667	7.3667	51.361	7.5499	67.2695	0.00304414
	G.mar.01_DE.MGSO_GBOL33714	G.mar.17_DE.MGSW_ZFMK19005	51.7429	10.7672	51.361	7.5499	226.304	0.00913242
	G.mar.02_DE.MGSO_ZFMK100409275	G.mar.17_DE.MGSW_ZFMK19005	51.7435	10.7673	51.361	7.5499	226.322	0.00152207
	G.mar.03_DE.MGSO_ZFMK1634	G.mar.17_DE.MGSW_ZFMK19005	51.841	10.326	51.361	7.5499	198.888	0.00152207
	G.mar.04_DE.MGSO_ZFMK1909	G.mar.17_DE.MGSW_ZFMK19005	50.8953	11.7527	51.361	7.5499	297.593	0.00761035
	G.mar.05_DE.MGSO_ZFMK19531	G.mar.17_DE.MGSW_ZFMK19005	50.8953	11.7527	51.361	7.5499	297.593	0.00761035
	G.mar.06_DE.MGSO_ZFMK2503693	G.mar.17_DE.MGSW_ZFMK19005	50.9194	11.5479	51.361	7.5499	282.997	0.00761035
	G.mar.07_DE.MGSO_ZFMK2503694	G.mar.17_DE.MGSW_ZFMK19005	50.9194	11.5479	51.361	7.5499	282.997	0.00761035
	G.mar.08_DE.MGSO_ZFMK2542470	G.mar.17_DE.MGSW_ZFMK19005	50.892	11.8209	51.361	7.5499	302.349	0.00761035
	G.mar.09_DE.MGSO_ZFMK2542471	G.mar.17_DE.MGSW_ZFMK19005	50.892	11.8209	51.361	7.5499	302.349	0.00913242
	G.mar.10_DE.MGSO_ZFMK2542541	G.mar.17_DE.MGSW_ZFMK19005	51.133	11.7487	51.361	7.5499	293.126	0.00761035
	G.mar.11_DE.MGSO_ZFMK2542542	G.mar.17_DE.MGSW_ZFMK19005	51.133	11.7487	51.361	7.5499	293.126	0.00761035
	G.mar.12_DE.MGSW_ZFMK18967	G.mar.17_DE.MGSW_ZFMK19005	50.6627	7.1026	51.361	7.5499	83.663	0.00152207
	G.mar.13_DE.MGSW_ZFMK18987	G.mar.17_DE.MGSW_ZFMK19005	50.6659	7.2156	51.361	7.5499	80.7013	0.00152207
	G.mar.14_DE.MGSW_ZFMK18988	G.mar.17_DE.MGSW_ZFMK19005	50.6867	7.2997	51.361	7.5499	76.9453	0.00304414
	G.mar.15_DE.MGSW_ZFMK18991	G.mar.17_DE.MGSW_ZFMK19005	50.7667	7.3667	51.361	7.5499	67.2695	0.00304414
	G.mar.16_DE.MGSW_ZFMK19003	G.mar.17_DE.MGSW_ZFMK19005	51.361	7.5499	51.361	7.5499	0	0.00304414
	G.mar.01_DE.MGSO_GBOL33714	G.mar.18_DE.MGSW_ZFMK19029	51.7429	10.7672	50.56	6.8078	305.639	0.0319635
	G.mar.02_DE.MGSO_ZFMK100409275	G.mar.18_DE.MGSW_ZFMK19029	51.7435	10.7673	50.56	6.8078	305.673	0.0304414
	G.mar.03_DE.MGSO_ZFMK1634	G.mar.18_DE.MGSW_ZFMK19029	51.841	10.326	50.56	6.8078	283.286	0.0304414
	G.mar.04_DE.MGSO_ZFMK1909	G.mar.18_DE.MGSW_ZFMK19029	50.8953	11.7527	50.56	6.8078	349.762	0.0304414
	G.mar.05_DE.MGSO_ZFMK19531	G.mar.18_DE.MGSW_ZFMK19029	50.8953	11.7527	50.56	6.8078	349.762	0.0304414
	G.mar.06_DE.MGSO_ZFMK2503693	G.mar.18_DE.MGSW_ZFMK19029	50.9194	11.5479	50.56	6.8078	335.672	0.0304414
	G.mar.07_DE.MGSO_ZFMK2503694	G.mar.18_DE.MGSW_ZFMK19029	50.9194	11.5479	50.56	6.8078	335.672	0.0304414
	G.mar.08_DE.MGSO_ZFMK2542470	G.mar.18_DE.MGSW_ZFMK19029	50.892	11.8209	50.56	6.8078	354.504	0.0304414
	G.mar.09_DE.MGSO_ZFMK2542471	G.mar.18_DE.MGSW_ZFMK19029	50.892	11.8209	50.56	6.8078	354.504	0.0319635
	G.mar.10_DE.MGSO_ZFMK2542541	G.mar.18_DE.MGSW_ZFMK19029	51.133	11.7487	50.56	6.8078	352.403	0.0304414
	G.mar.11_DE.MGSO_ZFMK2542542	G.mar.18_DE.MGSW_ZFMK19029	51.133	11.7487	50.56	6.8078	352.403	0.0304414
	G.mar.12_DE.MGSW_ZFMK18967	G.mar.18_DE.MGSW_ZFMK19029	50.6627	7.1026	50.56	6.8078	23.7152	0.0304414
	G.mar.13_DE.MGSW_ZFMK18987	G.mar.18_DE.MGSW_ZFMK19029	50.6659	7.2156	50.56	6.8078	31.0708	0.0304414
	G.mar.14_DE.MGSW_ZFMK18988	G.mar.18_DE.MGSW_ZFMK19029	50.6867	7.2997	50.56	6.8078	37.4278	0.0319635
	G.mar.15_DE.MGSW_ZFMK18991	G.mar.18_DE.MGSW_ZFMK19029	50.7667	7.3667	50.56	6.8078	45.5793	0.0319635
	G.mar.16_DE.MGSW_ZFMK19003	G.mar.18_DE.MGSW_ZFMK19029	51.361	7.5499	50.56	6.8078	103.057	0.0319635
	G.mar.17_DE.MGSW_ZFMK19005	G.mar.18_DE.MGSW_ZFMK19029	51.361	7.5499	50.56	6.8078	103.057	0.0289193
	G.mar.01_DE.MGSO_GBOL33714	G.mar.19_DE.MGSW_ZFMK19031	51.7429	10.7672	51.2299	7.054	263.161	0.0136986
	G.mar.02_DE.MGSO_ZFMK100409275	G.mar.19_DE.MGSW_ZFMK19031	51.7435	10.7673	51.2299	7.054	263.181	0.0121766
	G.mar.03_DE.MGSO_ZFMK1634	G.mar.19_DE.MGSW_ZFMK19031	51.841	10.326	51.2299	7.054	236.122	0.0121766
	G.mar.04_DE.MGSO_ZFMK1909	G.mar.19_DE.MGSW_ZFMK19031	50.8953	11.7527	51.2299	7.054	330.194	0.0121766
	G.mar.05_DE.MGSO_ZFMK19531	G.mar.19_DE.MGSW_ZFMK19031	50.8953	11.7527	51.2299	7.054	330.194	0.0121766
	G.mar.06_DE.MGSO_ZFMK2503693	G.mar.19_DE.MGSW_ZFMK19031	50.9194	11.5479	51.2299	7.054	315.608	0.0121766
	G.mar.07_DE.MGSO_ZFMK2503694	G.mar.19_DE.MGSW_ZFMK19031	50.9194	11.5479	51.2299	7.054	315.608	0.0121766
	G.mar.08_DE.MGSO_ZFMK2542470	G.mar.19_DE.MGSW_ZFMK19031	50.892	11.8209	51.2299	7.054	334.977	0.0121766
	G.mar.09_DE.MGSO_ZFMK2542471	G.mar.19_DE.MGSW_ZFMK19031	50.892	11.8209	51.2299	7.054	334.977	0.0136986
	G.mar.10_DE.MGSO_ZFMK2542541	G.mar.19_DE.MGSW_ZFMK19031	51.133	11.7487	51.2299	7.054	327.152	0.0121766
	G.mar.11_DE.MGSO_ZFMK2542542	G.mar.19_DE.MGSW_ZFMK19031	51.133	11.7487	51.2299	7.054	327.152	0.0121766
	G.mar.12_DE.MGSW_ZFMK18967	G.mar.19_DE.MGSW_ZFMK19031	50.6627	7.1026	51.2299	7.054	63.1219	0.0121766
	G.mar.13_DE.MGSW_ZFMK18987	G.mar.19_DE.MGSW_ZFMK19031	50.6659	7.2156	51.2299	7.054	63.6875	0.0121766
	G.mar.14_DE.MGSW_ZFMK18988	G.mar.19_DE.MGSW_ZFMK19031	50.6867	7.2997	51.2299	7.054	62.7652	0.0136986
	G.mar.15_DE.MGSW_ZFMK18991	G.mar.19_DE.MGSW_ZFMK19031	50.7667	7.3667	51.2299	7.054	55.926	0.0136986
	G.mar.16_DE.MGSW_ZFMK19003	G.mar.19_DE.MGSW_ZFMK19031	51.361	7.5499	51.2299	7.054	37.4116	0.0136986
	G.mar.17_DE.MGSW_ZFMK19005	G.mar.19_DE.MGSW_ZFMK19031	51.361	7.5499	51.2299	7.054	37.4116	0.0106545
	G.mar.18_DE.MGSW_ZFMK19029	G.mar.19_DE.MGSW_ZFMK19031	50.56	6.8078	51.2299	7.054	76.4165	0.0182648
	G.mar.01_DE.MGSO_GBOL33714	G.mar.20_DE.MGSW_ZFMK19044	51.7429	10.7672	50.8026	7.2418	266.399	0.0121766
	G.mar.02_DE.MGSO_ZFMK100409275	G.mar.20_DE.MGSW_ZFMK19044	51.7435	10.7673	50.8026	7.2418	266.43	0.00152207
	G.mar.03_DE.MGSO_ZFMK1634	G.mar.20_DE.MGSW_ZFMK19044	51.841	10.326	50.8026	7.2418	243.266	0.00152207
	G.mar.04_DE.MGSO_ZFMK1909	G.mar.20_DE.MGSW_ZFMK19044	50.8953	11.7527	50.8026	7.2418	316.606	0.0106545
	G.mar.05_DE.MGSO_ZFMK19531	G.mar.20_DE.MGSW_ZFMK19044	50.8953	11.7527	50.8026	7.2418	316.606	0.0106545
	G.mar.06_DE.MGSO_ZFMK2503693	G.mar.20_DE.MGSW_ZFMK19044	50.9194	11.5479	50.8026	7.2418	302.277	0.0106545
	G.mar.07_DE.MGSO_ZFMK2503694	G.mar.20_DE.MGSW_ZFMK19044	50.9194	11.5479	50.8026	7.2418	302.277	0.0106545
	G.mar.08_DE.MGSO_ZFMK2542470	G.mar.20_DE.MGSW_ZFMK19044	50.892	11.8209	50.8026	7.2418	321.386	0.0106545
	G.mar.09_DE.MGSO_ZFMK2542471	G.mar.20_DE.MGSW_ZFMK19044	50.892	11.8209	50.8026	7.2418	321.386	0.0121766
	G.mar.10_DE.MGSO_ZFMK2542541	G.mar.20_DE.MGSW_ZFMK19044	51.133	11.7487	50.8026	7.2418	317.48	0.0106545
	G.mar.11_DE.MGSO_ZFMK2542542	G.mar.20_DE.MGSW_ZFMK19044	51.133	11.7487	50.8026	7.2418	317.48	0.0106545
	G.mar.12_DE.MGSW_ZFMK18967	G.mar.20_DE.MGSW_ZFMK19044	50.6627	7.1026	50.8026	7.2418	18.3725	0.00152207
	G.mar.13_DE.MGSW_ZFMK18987	G.mar.20_DE.MGSW_ZFMK19044	50.6659	7.2156	50.8026	7.2418	15.3022	0.00152207
	G.mar.14_DE.MGSW_ZFMK18988	G.mar.20_DE.MGSW_ZFMK19044	50.6867	7.2997	50.8026	7.2418	13.5076	0
	G.mar.15_DE.MGSW_ZFMK18991	G.mar.20_DE.MGSW_ZFMK19044	50.7667	7.3667	50.8026	7.2418	9.63942	0.00304414
	G.mar.16_DE.MGSW_ZFMK19003	G.mar.20_DE.MGSW_ZFMK19044	51.361	7.5499	50.8026	7.2418	65.674	0.00304414
	G.mar.17_DE.MGSW_ZFMK19005	G.mar.20_DE.MGSW_ZFMK19044	51.361	7.5499	50.8026	7.2418	65.674	0.00304414
	G.mar.18_DE.MGSW_ZFMK19029	G.mar.20_DE.MGSW_ZFMK19044	50.56	6.8078	50.8026	7.2418	40.7508	0.0319635
	G.mar.19_DE.MGSW_ZFMK19031	G.mar.20_DE.MGSW_ZFMK19044	51.2299	7.054	50.8026	7.2418	49.2653	0.0136986
	G.mar.01_DE.MGSO_GBOL33714	G.mar.21_DE.MGSW_ZFMK19045	51.7429	10.7672	51.3589	7.1697	252.195	0.0106545
	G.mar.02_DE.MGSO_ZFMK100409275	G.mar.21_DE.MGSW_ZFMK19045	51.7435	10.7673	51.3589	7.1697	252.211	0
	G.mar.03_DE.MGSO_ZFMK1634	G.mar.21_DE.MGSW_ZFMK19045	51.841	10.326	51.3589	7.1697	224.334	0
	G.mar.04_DE.MGSO_ZFMK1909	G.mar.21_DE.MGSW_ZFMK19045	50.8953	11.7527	51.3589	7.1697	323.695	0.00913242
	G.mar.05_DE.MGSO_ZFMK19531	G.mar.21_DE.MGSW_ZFMK19045	50.8953	11.7527	51.3589	7.1697	323.695	0.00913242
	G.mar.06_DE.MGSO_ZFMK2503693	G.mar.21_DE.MGSW_ZFMK19045	50.9194	11.5479	51.3589	7.1697	309.096	0.00913242
	G.mar.07_DE.MGSO_ZFMK2503694	G.mar.21_DE.MGSW_ZFMK19045	50.9194	11.5479	51.3589	7.1697	309.096	0.00913242
	G.mar.08_DE.MGSO_ZFMK2542470	G.mar.21_DE.MGSW_ZFMK19045	50.892	11.8209	51.3589	7.1697	328.458	0.00913242
	G.mar.09_DE.MGSO_ZFMK2542471	G.mar.21_DE.MGSW_ZFMK19045	50.892	11.8209	51.3589	7.1697	328.458	0.0106545
	G.mar.10_DE.MGSO_ZFMK2542541	G.mar.21_DE.MGSW_ZFMK19045	51.133	11.7487	51.3589	7.1697	319.459	0.00913242
	G.mar.11_DE.MGSO_ZFMK2542542	G.mar.21_DE.MGSW_ZFMK19045	51.133	11.7487	51.3589	7.1697	319.459	0.00913242
	G.mar.12_DE.MGSW_ZFMK18967	G.mar.21_DE.MGSW_ZFMK19045	50.6627	7.1026	51.3589	7.1697	77.5074	0
	G.mar.13_DE.MGSW_ZFMK18987	G.mar.21_DE.MGSW_ZFMK19045	50.6659	7.2156	51.3589	7.1697	77.0765	0
	G.mar.14_DE.MGSW_ZFMK18988	G.mar.21_DE.MGSW_ZFMK19045	50.6867	7.2997	51.3589	7.1697	75.2489	0.00152207
	G.mar.15_DE.MGSW_ZFMK18991	G.mar.21_DE.MGSW_ZFMK19045	50.7667	7.3667	51.3589	7.1697	67.231	0.00152207
	G.mar.16_DE.MGSW_ZFMK19003	G.mar.21_DE.MGSW_ZFMK19045	51.361	7.5499	51.3589	7.1697	26.3828	0.00152207
	G.mar.17_DE.MGSW_ZFMK19005	G.mar.21_DE.MGSW_ZFMK19045	51.361	7.5499	51.3589	7.1697	26.3828	0.00152207
	G.mar.18_DE.MGSW_ZFMK19029	G.mar.21_DE.MGSW_ZFMK19045	50.56	6.8078	51.3589	7.1697	92.3207	0.0304414
	G.mar.19_DE.MGSW_ZFMK19031	G.mar.21_DE.MGSW_ZFMK19045	51.2299	7.054	51.3589	7.1697	16.4358	0.0121766
	G.mar.20_DE.MGSW_ZFMK19044	G.mar.21_DE.MGSW_ZFMK19045	50.8026	7.2418	51.3589	7.1697	62.0235	0.00152207
	G.mar.01_DE.MGSO_GBOL33714	G.mar.22_DE.MGSW_ZFMK19046	51.7429	10.7672	51.2299	7.054	263.161	0.0106545
	G.mar.02_DE.MGSO_ZFMK100409275	G.mar.22_DE.MGSW_ZFMK19046	51.7435	10.7673	51.2299	7.054	263.181	0
	G.mar.03_DE.MGSO_ZFMK1634	G.mar.22_DE.MGSW_ZFMK19046	51.841	10.326	51.2299	7.054	236.122	0
	G.mar.04_DE.MGSO_ZFMK1909	G.mar.22_DE.MGSW_ZFMK19046	50.8953	11.7527	51.2299	7.054	330.194	0.00913242
	G.mar.05_DE.MGSO_ZFMK19531	G.mar.22_DE.MGSW_ZFMK19046	50.8953	11.7527	51.2299	7.054	330.194	0.00913242
	G.mar.06_DE.MGSO_ZFMK2503693	G.mar.22_DE.MGSW_ZFMK19046	50.9194	11.5479	51.2299	7.054	315.608	0.00913242
	G.mar.07_DE.MGSO_ZFMK2503694	G.mar.22_DE.MGSW_ZFMK19046	50.9194	11.5479	51.2299	7.054	315.608	0.00913242
	G.mar.08_DE.MGSO_ZFMK2542470	G.mar.22_DE.MGSW_ZFMK19046	50.892	11.8209	51.2299	7.054	334.977	0.00913242
	G.mar.09_DE.MGSO_ZFMK2542471	G.mar.22_DE.MGSW_ZFMK19046	50.892	11.8209	51.2299	7.054	334.977	0.0106545
	G.mar.10_DE.MGSO_ZFMK2542541	G.mar.22_DE.MGSW_ZFMK19046	51.133	11.7487	51.2299	7.054	327.152	0.00913242
	G.mar.11_DE.MGSO_ZFMK2542542	G.mar.22_DE.MGSW_ZFMK19046	51.133	11.7487	51.2299	7.054	327.152	0.00913242
	G.mar.12_DE.MGSW_ZFMK18967	G.mar.22_DE.MGSW_ZFMK19046	50.6627	7.1026	51.2299	7.054	63.1219	0
	G.mar.13_DE.MGSW_ZFMK18987	G.mar.22_DE.MGSW_ZFMK19046	50.6659	7.2156	51.2299	7.054	63.6875	0
	G.mar.14_DE.MGSW_ZFMK18988	G.mar.22_DE.MGSW_ZFMK19046	50.6867	7.2997	51.2299	7.054	62.7652	0.00152207
	G.mar.15_DE.MGSW_ZFMK18991	G.mar.22_DE.MGSW_ZFMK19046	50.7667	7.3667	51.2299	7.054	55.926	0.00152207
	G.mar.16_DE.MGSW_ZFMK19003	G.mar.22_DE.MGSW_ZFMK19046	51.361	7.5499	51.2299	7.054	37.4116	0.00152207
	G.mar.17_DE.MGSW_ZFMK19005	G.mar.22_DE.MGSW_ZFMK19046	51.361	7.5499	51.2299	7.054	37.4116	0.00152207
	G.mar.18_DE.MGSW_ZFMK19029	G.mar.22_DE.MGSW_ZFMK19046	50.56	6.8078	51.2299	7.054	76.4165	0.0304414
	G.mar.19_DE.MGSW_ZFMK19031	G.mar.22_DE.MGSW_ZFMK19046	51.2299	7.054	51.2299	7.054	0	0.0121766
	G.mar.20_DE.MGSW_ZFMK19044	G.mar.22_DE.MGSW_ZFMK19046	50.8026	7.2418	51.2299	7.054	49.2653	0.00152207
	G.mar.21_DE.MGSW_ZFMK19045	G.mar.22_DE.MGSW_ZFMK19046	51.3589	7.1697	51.2299	7.054	16.4358	0
	G.mar.01_DE.MGSO_GBOL33714	G.mar.23_DE.MGSW_ZFMK19047	51.7429	10.7672	50.714	7.1772	274.704	0.0121766
	G.mar.02_DE.MGSO_ZFMK100409275	G.mar.23_DE.MGSW_ZFMK19047	51.7435	10.7673	50.714	7.1772	274.736	0.00152207
	G.mar.03_DE.MGSO_ZFMK1634	G.mar.23_DE.MGSW_ZFMK19047	51.841	10.326	50.714	7.1772	252.15	0.00152207
	G.mar.04_DE.MGSO_ZFMK1909	G.mar.23_DE.MGSW_ZFMK19047	50.8953	11.7527	50.714	7.1772	321.904	0.0106545
	G.mar.05_DE.MGSO_ZFMK19531	G.mar.23_DE.MGSW_ZFMK19047	50.8953	11.7527	50.714	7.1772	321.904	0.0106545
	G.mar.06_DE.MGSO_ZFMK2503693	G.mar.23_DE.MGSW_ZFMK19047	50.9194	11.5479	50.714	7.1772	307.666	0.0106545
	G.mar.07_DE.MGSO_ZFMK2503694	G.mar.23_DE.MGSW_ZFMK19047	50.9194	11.5479	50.714	7.1772	307.666	0.0106545
	G.mar.08_DE.MGSO_ZFMK2542470	G.mar.23_DE.MGSW_ZFMK19047	50.892	11.8209	50.714	7.1772	326.671	0.0106545
	G.mar.09_DE.MGSO_ZFMK2542471	G.mar.23_DE.MGSW_ZFMK19047	50.892	11.8209	50.714	7.1772	326.671	0.0121766
	G.mar.10_DE.MGSO_ZFMK2542541	G.mar.23_DE.MGSW_ZFMK19047	51.133	11.7487	50.714	7.1772	323.54	0.0106545
	G.mar.11_DE.MGSO_ZFMK2542542	G.mar.23_DE.MGSW_ZFMK19047	51.133	11.7487	50.714	7.1772	323.54	0.0106545
	G.mar.12_DE.MGSW_ZFMK18967	G.mar.23_DE.MGSW_ZFMK19047	50.6627	7.1026	50.714	7.1772	7.75123	0.00152207
	G.mar.13_DE.MGSW_ZFMK18987	G.mar.23_DE.MGSW_ZFMK19047	50.6659	7.2156	50.714	7.1772	5.98985	0.00152207
	G.mar.14_DE.MGSW_ZFMK18988	G.mar.23_DE.MGSW_ZFMK19047	50.6867	7.2997	50.714	7.1772	9.14018	0.00304414
	G.mar.15_DE.MGSW_ZFMK18991	G.mar.23_DE.MGSW_ZFMK19047	50.7667	7.3667	50.714	7.1772	14.5564	0
	G.mar.16_DE.MGSW_ZFMK19003	G.mar.23_DE.MGSW_ZFMK19047	51.361	7.5499	50.714	7.1772	76.469	0.00304414
	G.mar.17_DE.MGSW_ZFMK19005	G.mar.23_DE.MGSW_ZFMK19047	51.361	7.5499	50.714	7.1772	76.469	0.00304414
	G.mar.18_DE.MGSW_ZFMK19029	G.mar.23_DE.MGSW_ZFMK19047	50.56	6.8078	50.714	7.1772	31.1557	0.0319635
	G.mar.19_DE.MGSW_ZFMK19031	G.mar.23_DE.MGSW_ZFMK19047	51.2299	7.054	50.714	7.1772	57.974	0.0136986
	G.mar.20_DE.MGSW_ZFMK19044	G.mar.23_DE.MGSW_ZFMK19047	50.8026	7.2418	50.714	7.1772	10.8425	0.00304414
	G.mar.21_DE.MGSW_ZFMK19045	G.mar.23_DE.MGSW_ZFMK19047	51.3589	7.1697	50.714	7.1772	71.6665	0.00152207
	G.mar.22_DE.MGSW_ZFMK19046	G.mar.23_DE.MGSW_ZFMK19047	51.2299	7.054	50.714	7.1772	57.974	0.00152207
	G.mar.01_DE.MGSO_GBOL33714	G.mar.24_DE.MGSW_ZFMK19048	51.7429	10.7672	50.6715	7.0469	285.019	0.0121766
	G.mar.02_DE.MGSO_ZFMK100409275	G.mar.24_DE.MGSW_ZFMK19048	51.7435	10.7673	50.6715	7.0469	285.051	0.00152207
	G.mar.03_DE.MGSO_ZFMK1634	G.mar.24_DE.MGSW_ZFMK19048	51.841	10.326	50.6715	7.0469	262.445	0.00152207
	G.mar.04_DE.MGSO_ZFMK1909	G.mar.24_DE.MGSW_ZFMK19048	50.8953	11.7527	50.6715	7.0469	331.503	0.0106545
	G.mar.05_DE.MGSO_ZFMK19531	G.mar.24_DE.MGSW_ZFMK19048	50.8953	11.7527	50.6715	7.0469	331.503	0.0106545
	G.mar.06_DE.MGSO_ZFMK2503693	G.mar.24_DE.MGSW_ZFMK19048	50.9194	11.5479	50.6715	7.0469	317.303	0.0106545
	G.mar.07_DE.MGSO_ZFMK2503694	G.mar.24_DE.MGSW_ZFMK19048	50.9194	11.5479	50.6715	7.0469	317.303	0.0106545
	G.mar.08_DE.MGSO_ZFMK2542470	G.mar.24_DE.MGSW_ZFMK19048	50.892	11.8209	50.6715	7.0469	336.264	0.0106545
	G.mar.09_DE.MGSO_ZFMK2542471	G.mar.24_DE.MGSW_ZFMK19048	50.892	11.8209	50.6715	7.0469	336.264	0.0121766
	G.mar.10_DE.MGSO_ZFMK2542541	G.mar.24_DE.MGSW_ZFMK19048	51.133	11.7487	50.6715	7.0469	333.412	0.0106545
	G.mar.11_DE.MGSO_ZFMK2542542	G.mar.24_DE.MGSW_ZFMK19048	51.133	11.7487	50.6715	7.0469	333.412	0.0106545
	G.mar.12_DE.MGSW_ZFMK18967	G.mar.24_DE.MGSW_ZFMK19048	50.6627	7.1026	50.6715	7.0469	4.04321	0.00152207
	G.mar.13_DE.MGSW_ZFMK18987	G.mar.24_DE.MGSW_ZFMK19048	50.6659	7.2156	50.6715	7.0469	11.8981	0.00152207
	G.mar.14_DE.MGSW_ZFMK18988	G.mar.24_DE.MGSW_ZFMK19048	50.6867	7.2997	50.6715	7.0469	17.8811	0.00304414
	G.mar.15_DE.MGSW_ZFMK18991	G.mar.24_DE.MGSW_ZFMK19048	50.7667	7.3667	50.6715	7.0469	24.8628	0.00304414
	G.mar.16_DE.MGSW_ZFMK19003	G.mar.24_DE.MGSW_ZFMK19048	51.361	7.5499	50.6715	7.0469	84.304	0.00304414
	G.mar.17_DE.MGSW_ZFMK19005	G.mar.24_DE.MGSW_ZFMK19048	51.361	7.5499	50.6715	7.0469	84.304	0.00304414
	G.mar.18_DE.MGSW_ZFMK19029	G.mar.24_DE.MGSW_ZFMK19048	50.56	6.8078	50.6715	7.0469	20.9226	0.0289193
	G.mar.19_DE.MGSW_ZFMK19031	G.mar.24_DE.MGSW_ZFMK19048	51.2299	7.054	50.6715	7.0469	62.0543	0.0106545
	G.mar.20_DE.MGSW_ZFMK19044	G.mar.24_DE.MGSW_ZFMK19048	50.8026	7.2418	50.6715	7.0469	20.0031	0.00304414
	G.mar.21_DE.MGSW_ZFMK19045	G.mar.24_DE.MGSW_ZFMK19048	51.3589	7.1697	50.6715	7.0469	76.8683	0.00152207
	G.mar.22_DE.MGSW_ZFMK19046	G.mar.24_DE.MGSW_ZFMK19048	51.2299	7.054	50.6715	7.0469	62.0543	0.00152207
	G.mar.23_DE.MGSW_ZFMK19047	G.mar.24_DE.MGSW_ZFMK19048	50.714	7.1772	50.6715	7.0469	10.317	0.00304414
	G.mar.01_DE.MGSO_GBOL33714	G.mar.25_DE.MGSW_ZFMK19049	51.7429	10.7672	51.291	7.2522	248.174	0.0106545
	G.mar.02_DE.MGSO_ZFMK100409275	G.mar.25_DE.MGSW_ZFMK19049	51.7435	10.7673	51.291	7.2522	248.192	0
	G.mar.03_DE.MGSO_ZFMK1634	G.mar.25_DE.MGSW_ZFMK19049	51.841	10.326	51.291	7.2522	220.93	0
	G.mar.04_DE.MGSO_ZFMK1909	G.mar.25_DE.MGSW_ZFMK19049	50.8953	11.7527	51.291	7.2522	317.114	0.00913242
	G.mar.05_DE.MGSO_ZFMK19531	G.mar.25_DE.MGSW_ZFMK19049	50.8953	11.7527	51.291	7.2522	317.114	0.00913242
	G.mar.06_DE.MGSO_ZFMK2503693	G.mar.25_DE.MGSW_ZFMK19049	50.9194	11.5479	51.291	7.2522	302.517	0.00913242
	G.mar.07_DE.MGSO_ZFMK2503694	G.mar.25_DE.MGSW_ZFMK19049	50.9194	11.5479	51.291	7.2522	302.517	0.00913242
	G.mar.08_DE.MGSO_ZFMK2542470	G.mar.25_DE.MGSW_ZFMK19049	50.892	11.8209	51.291	7.2522	321.887	0.00913242
	G.mar.09_DE.MGSO_ZFMK2542471	G.mar.25_DE.MGSW_ZFMK19049	50.892	11.8209	51.291	7.2522	321.887	0.0106545
	G.mar.10_DE.MGSO_ZFMK2542541	G.mar.25_DE.MGSW_ZFMK19049	51.133	11.7487	51.291	7.2522	313.459	0.00913242
	G.mar.11_DE.MGSO_ZFMK2542542	G.mar.25_DE.MGSW_ZFMK19049	51.133	11.7487	51.291	7.2522	313.459	0.00913242
	G.mar.12_DE.MGSW_ZFMK18967	G.mar.25_DE.MGSW_ZFMK19049	50.6627	7.1026	51.291	7.2522	70.6001	0
	G.mar.13_DE.MGSW_ZFMK18987	G.mar.25_DE.MGSW_ZFMK19049	50.6659	7.2156	51.291	7.2522	69.5115	0
	G.mar.14_DE.MGSW_ZFMK18988	G.mar.25_DE.MGSW_ZFMK19049	50.6867	7.2997	51.291	7.2522	67.2351	0.00152207
	G.mar.15_DE.MGSW_ZFMK18991	G.mar.25_DE.MGSW_ZFMK19049	50.7667	7.3667	51.291	7.2522	58.8099	0.00152207
	G.mar.16_DE.MGSW_ZFMK19003	G.mar.25_DE.MGSW_ZFMK19049	51.361	7.5499	51.291	7.2522	22.0876	0.00152207
	G.mar.17_DE.MGSW_ZFMK19005	G.mar.25_DE.MGSW_ZFMK19049	51.361	7.5499	51.291	7.2522	22.0876	0.00152207
	G.mar.18_DE.MGSW_ZFMK19029	G.mar.25_DE.MGSW_ZFMK19049	50.56	6.8078	51.291	7.2522	86.992	0.0304414
	G.mar.19_DE.MGSW_ZFMK19031	G.mar.25_DE.MGSW_ZFMK19049	51.2299	7.054	51.291	7.2522	15.3645	0.0121766
	G.mar.20_DE.MGSW_ZFMK19044	G.mar.25_DE.MGSW_ZFMK19049	50.8026	7.2418	51.291	7.2522	54.2784	0.00152207
	G.mar.21_DE.MGSW_ZFMK19045	G.mar.25_DE.MGSW_ZFMK19049	51.3589	7.1697	51.291	7.2522	9.47388	0
	G.mar.22_DE.MGSW_ZFMK19046	G.mar.25_DE.MGSW_ZFMK19049	51.2299	7.054	51.291	7.2522	15.3645	0
	G.mar.23_DE.MGSW_ZFMK19047	G.mar.25_DE.MGSW_ZFMK19049	50.714	7.1772	51.291	7.2522	64.3333	0.00152207
	G.mar.24_DE.MGSW_ZFMK19048	G.mar.25_DE.MGSW_ZFMK19049	50.6715	7.0469	51.291	7.2522	70.3243	0.00152207
	G.mar.01_DE.MGSO_GBOL33714	G.mar.26_DE.MGSW_ZFMK19051	51.7429	10.7672	50.5511	7.1722	283.411	0.0319635
	G.mar.02_DE.MGSO_ZFMK100409275	G.mar.26_DE.MGSW_ZFMK19051	51.7435	10.7673	50.5511	7.1722	283.447	0.0304414
	G.mar.03_DE.MGSO_ZFMK1634	G.mar.26_DE.MGSW_ZFMK19051	51.841	10.326	50.5511	7.1722	262.224	0.0304414
	G.mar.04_DE.MGSO_ZFMK1909	G.mar.26_DE.MGSW_ZFMK19051	50.8953	11.7527	50.5511	7.1722	324.445	0.0304414
	G.mar.05_DE.MGSO_ZFMK19531	G.mar.26_DE.MGSW_ZFMK19051	50.8953	11.7527	50.5511	7.1722	324.445	0.0304414
	G.mar.06_DE.MGSO_ZFMK2503693	G.mar.26_DE.MGSW_ZFMK19051	50.9194	11.5479	50.5511	7.1722	310.412	0.0304414
	G.mar.07_DE.MGSO_ZFMK2503694	G.mar.26_DE.MGSW_ZFMK19051	50.9194	11.5479	50.5511	7.1722	310.412	0.0304414
	G.mar.08_DE.MGSO_ZFMK2542470	G.mar.26_DE.MGSW_ZFMK19051	50.892	11.8209	50.5511	7.1722	329.177	0.0304414
	G.mar.09_DE.MGSO_ZFMK2542471	G.mar.26_DE.MGSW_ZFMK19051	50.892	11.8209	50.5511	7.1722	329.177	0.0319635
	G.mar.10_DE.MGSO_ZFMK2542541	G.mar.26_DE.MGSW_ZFMK19051	51.133	11.7487	50.5511	7.1722	327.526	0.0304414
	G.mar.11_DE.MGSO_ZFMK2542542	G.mar.26_DE.MGSW_ZFMK19051	51.133	11.7487	50.5511	7.1722	327.526	0.0304414
	G.mar.12_DE.MGSW_ZFMK18967	G.mar.26_DE.MGSW_ZFMK19051	50.6627	7.1026	50.5511	7.1722	13.3376	0.0304414
	G.mar.13_DE.MGSW_ZFMK18987	G.mar.26_DE.MGSW_ZFMK19051	50.6659	7.2156	50.5511	7.1722	13.1192	0.0304414
	G.mar.14_DE.MGSW_ZFMK18988	G.mar.26_DE.MGSW_ZFMK19051	50.6867	7.2997	50.5511	7.1722	17.5463	0.0319635
	G.mar.15_DE.MGSW_ZFMK18991	G.mar.26_DE.MGSW_ZFMK19051	50.7667	7.3667	50.5511	7.1722	27.5998	0.0319635
	G.mar.16_DE.MGSW_ZFMK19003	G.mar.26_DE.MGSW_ZFMK19051	51.361	7.5499	50.5511	7.1722	93.8029	0.0319635
	G.mar.17_DE.MGSW_ZFMK19005	G.mar.26_DE.MGSW_ZFMK19051	51.361	7.5499	50.5511	7.1722	93.8029	0.0289193
	G.mar.18_DE.MGSW_ZFMK19029	G.mar.26_DE.MGSW_ZFMK19051	50.56	6.8078	50.5511	7.1722	25.746	0
	G.mar.19_DE.MGSW_ZFMK19031	G.mar.26_DE.MGSW_ZFMK19051	51.2299	7.054	50.5511	7.1722	75.8854	0.0182648
	G.mar.20_DE.MGSW_ZFMK19044	G.mar.26_DE.MGSW_ZFMK19051	50.8026	7.2418	50.5511	7.1722	28.3745	0.0319635
	G.mar.21_DE.MGSW_ZFMK19045	G.mar.26_DE.MGSW_ZFMK19051	51.3589	7.1697	50.5511	7.1722	89.767	0.0304414
	G.mar.22_DE.MGSW_ZFMK19046	G.mar.26_DE.MGSW_ZFMK19051	51.2299	7.054	50.5511	7.1722	75.8854	0.0304414
	G.mar.23_DE.MGSW_ZFMK19047	G.mar.26_DE.MGSW_ZFMK19051	50.714	7.1772	50.5511	7.1722	18.1057	0.0319635
	G.mar.24_DE.MGSW_ZFMK19048	G.mar.26_DE.MGSW_ZFMK19051	50.6715	7.0469	50.5511	7.1722	16.0338	0.0289193
	G.mar.25_DE.MGSW_ZFMK19049	G.mar.26_DE.MGSW_ZFMK19051	51.291	7.2522	50.5511	7.1722	82.4122	0.0304414
	G.mar.01_DE.MGSO_GBOL33714	G.mar.27_DE.MGSW_ZFMK19054	51.7429	10.7672	50.4647	7.2225	285.176	0.0319635
	G.mar.02_DE.MGSO_ZFMK100409275	G.mar.27_DE.MGSW_ZFMK19054	51.7435	10.7673	50.4647	7.2225	285.214	0.0304414
	G.mar.03_DE.MGSO_ZFMK1634	G.mar.27_DE.MGSW_ZFMK19054	51.841	10.326	50.4647	7.2225	264.89	0.0304414
	G.mar.04_DE.MGSO_ZFMK1909	G.mar.27_DE.MGSW_ZFMK19054	50.8953	11.7527	50.4647	7.2225	322.508	0.0304414
	G.mar.05_DE.MGSO_ZFMK19531	G.mar.27_DE.MGSW_ZFMK19054	50.8953	11.7527	50.4647	7.2225	322.508	0.0304414
	G.mar.06_DE.MGSO_ZFMK2503693	G.mar.27_DE.MGSW_ZFMK19054	50.9194	11.5479	50.4647	7.2225	308.61	0.0304414
	G.mar.07_DE.MGSO_ZFMK2503694	G.mar.27_DE.MGSW_ZFMK19054	50.9194	11.5479	50.4647	7.2225	308.61	0.0304414
	G.mar.08_DE.MGSO_ZFMK2542470	G.mar.27_DE.MGSW_ZFMK19054	50.892	11.8209	50.4647	7.2225	327.213	0.0304414
	G.mar.09_DE.MGSO_ZFMK2542471	G.mar.27_DE.MGSW_ZFMK19054	50.892	11.8209	50.4647	7.2225	327.213	0.0319635
	G.mar.10_DE.MGSO_ZFMK2542541	G.mar.27_DE.MGSW_ZFMK19054	51.133	11.7487	50.4647	7.2225	326.404	0.0304414
	G.mar.11_DE.MGSO_ZFMK2542542	G.mar.27_DE.MGSW_ZFMK19054	51.133	11.7487	50.4647	7.2225	326.404	0.0304414
	G.mar.12_DE.MGSW_ZFMK18967	G.mar.27_DE.MGSW_ZFMK19054	50.6627	7.1026	50.4647	7.2225	23.5744	0.0304414
	G.mar.13_DE.MGSW_ZFMK18987	G.mar.27_DE.MGSW_ZFMK19054	50.6659	7.2156	50.4647	7.2225	22.3637	0.0304414
	G.mar.14_DE.MGSW_ZFMK18988	G.mar.27_DE.MGSW_ZFMK19054	50.6867	7.2997	50.4647	7.2225	25.2642	0.0319635
	G.mar.15_DE.MGSW_ZFMK18991	G.mar.27_DE.MGSW_ZFMK19054	50.7667	7.3667	50.4647	7.2225	35.0662	0.0319635
	G.mar.16_DE.MGSW_ZFMK19003	G.mar.27_DE.MGSW_ZFMK19054	51.361	7.5499	50.4647	7.2225	102.209	0.0319635
	G.mar.17_DE.MGSW_ZFMK19005	G.mar.27_DE.MGSW_ZFMK19054	51.361	7.5499	50.4647	7.2225	102.209	0.0289193
	G.mar.18_DE.MGSW_ZFMK19029	G.mar.27_DE.MGSW_ZFMK19054	50.56	6.8078	50.4647	7.2225	31.1599	0
	G.mar.19_DE.MGSW_ZFMK19031	G.mar.27_DE.MGSW_ZFMK19054	51.2299	7.054	50.4647	7.2225	85.8508	0.0182648
	G.mar.20_DE.MGSW_ZFMK19044	G.mar.27_DE.MGSW_ZFMK19054	50.8026	7.2418	50.4647	7.2225	37.5738	0.0319635
	G.mar.21_DE.MGSW_ZFMK19045	G.mar.27_DE.MGSW_ZFMK19054	51.3589	7.1697	50.4647	7.2225	99.4369	0.0304414
	G.mar.22_DE.MGSW_ZFMK19046	G.mar.27_DE.MGSW_ZFMK19054	51.2299	7.054	50.4647	7.2225	85.8508	0.0304414
	G.mar.23_DE.MGSW_ZFMK19047	G.mar.27_DE.MGSW_ZFMK19054	50.714	7.1772	50.4647	7.2225	27.8872	0.0319635
	G.mar.24_DE.MGSW_ZFMK19048	G.mar.27_DE.MGSW_ZFMK19054	50.6715	7.0469	50.4647	7.2225	26.1099	0.0289193
	G.mar.25_DE.MGSW_ZFMK19049	G.mar.27_DE.MGSW_ZFMK19054	51.291	7.2522	50.4647	7.2225	91.8463	0.0304414
	G.mar.26_DE.MGSW_ZFMK19051	G.mar.27_DE.MGSW_ZFMK19054	50.5511	7.1722	50.4647	7.2225	10.2382	0
	G.mar.01_DE.MGSO_GBOL33714	G.mar.28_DE.MGSW_ZFMK19057	51.7429	10.7672	51.361	7.5499	226.304	0.0106545
	G.mar.02_DE.MGSO_ZFMK100409275	G.mar.28_DE.MGSW_ZFMK19057	51.7435	10.7673	51.361	7.5499	226.322	0
	G.mar.03_DE.MGSO_ZFMK1634	G.mar.28_DE.MGSW_ZFMK19057	51.841	10.326	51.361	7.5499	198.888	0
	G.mar.04_DE.MGSO_ZFMK1909	G.mar.28_DE.MGSW_ZFMK19057	50.8953	11.7527	51.361	7.5499	297.593	0.00913242
	G.mar.05_DE.MGSO_ZFMK19531	G.mar.28_DE.MGSW_ZFMK19057	50.8953	11.7527	51.361	7.5499	297.593	0.00913242
	G.mar.06_DE.MGSO_ZFMK2503693	G.mar.28_DE.MGSW_ZFMK19057	50.9194	11.5479	51.361	7.5499	282.997	0.00913242
	G.mar.07_DE.MGSO_ZFMK2503694	G.mar.28_DE.MGSW_ZFMK19057	50.9194	11.5479	51.361	7.5499	282.997	0.00913242
	G.mar.08_DE.MGSO_ZFMK2542470	G.mar.28_DE.MGSW_ZFMK19057	50.892	11.8209	51.361	7.5499	302.349	0.00913242
	G.mar.09_DE.MGSO_ZFMK2542471	G.mar.28_DE.MGSW_ZFMK19057	50.892	11.8209	51.361	7.5499	302.349	0.0106545
	G.mar.10_DE.MGSO_ZFMK2542541	G.mar.28_DE.MGSW_ZFMK19057	51.133	11.7487	51.361	7.5499	293.126	0.00913242
	G.mar.11_DE.MGSO_ZFMK2542542	G.mar.28_DE.MGSW_ZFMK19057	51.133	11.7487	51.361	7.5499	293.126	0.00913242
	G.mar.12_DE.MGSW_ZFMK18967	G.mar.28_DE.MGSW_ZFMK19057	50.6627	7.1026	51.361	7.5499	83.663	0
	G.mar.13_DE.MGSW_ZFMK18987	G.mar.28_DE.MGSW_ZFMK19057	50.6659	7.2156	51.361	7.5499	80.7013	0
	G.mar.14_DE.MGSW_ZFMK18988	G.mar.28_DE.MGSW_ZFMK19057	50.6867	7.2997	51.361	7.5499	76.9453	0.00152207
	G.mar.15_DE.MGSW_ZFMK18991	G.mar.28_DE.MGSW_ZFMK19057	50.7667	7.3667	51.361	7.5499	67.2695	0.00152207
	G.mar.16_DE.MGSW_ZFMK19003	G.mar.28_DE.MGSW_ZFMK19057	51.361	7.5499	51.361	7.5499	0	0.00152207
	G.mar.17_DE.MGSW_ZFMK19005	G.mar.28_DE.MGSW_ZFMK19057	51.361	7.5499	51.361	7.5499	0	0.00152207
	G.mar.18_DE.MGSW_ZFMK19029	G.mar.28_DE.MGSW_ZFMK19057	50.56	6.8078	51.361	7.5499	103.057	0.0304414
	G.mar.19_DE.MGSW_ZFMK19031	G.mar.28_DE.MGSW_ZFMK19057	51.2299	7.054	51.361	7.5499	37.4116	0.0121766
	G.mar.20_DE.MGSW_ZFMK19044	G.mar.28_DE.MGSW_ZFMK19057	50.8026	7.2418	51.361	7.5499	65.674	0.00152207
	G.mar.21_DE.MGSW_ZFMK19045	G.mar.28_DE.MGSW_ZFMK19057	51.3589	7.1697	51.361	7.5499	26.3828	0
	G.mar.22_DE.MGSW_ZFMK19046	G.mar.28_DE.MGSW_ZFMK19057	51.2299	7.054	51.361	7.5499	37.4116	0
	G.mar.23_DE.MGSW_ZFMK19047	G.mar.28_DE.MGSW_ZFMK19057	50.714	7.1772	51.361	7.5499	76.469	0.00152207
	G.mar.24_DE.MGSW_ZFMK19048	G.mar.28_DE.MGSW_ZFMK19057	50.6715	7.0469	51.361	7.5499	84.304	0.00152207
	G.mar.25_DE.MGSW_ZFMK19049	G.mar.28_DE.MGSW_ZFMK19057	51.291	7.2522	51.361	7.5499	22.0876	0
	G.mar.26_DE.MGSW_ZFMK19051	G.mar.28_DE.MGSW_ZFMK19057	50.5511	7.1722	51.361	7.5499	93.8029	0.0304414
	G.mar.27_DE.MGSW_ZFMK19054	G.mar.28_DE.MGSW_ZFMK19057	50.4647	7.2225	51.361	7.5499	102.209	0.0304414
	G.mar.01_DE.MGSO_GBOL33714	G.mar.29_DE.MGSW_ZFMK19539	51.7429	10.7672	50.6319	6.4731	323.502	0.0334855
	G.mar.02_DE.MGSO_ZFMK100409275	G.mar.29_DE.MGSW_ZFMK19539	51.7435	10.7673	50.6319	6.4731	323.532	0.0319635
	G.mar.03_DE.MGSO_ZFMK1634	G.mar.29_DE.MGSW_ZFMK19539	51.841	10.326	50.6319	6.4731	299.805	0.0319635
	G.mar.04_DE.MGSO_ZFMK1909	G.mar.29_DE.MGSW_ZFMK19539	50.8953	11.7527	50.6319	6.4731	372.17	0.0319635
	G.mar.05_DE.MGSO_ZFMK19531	G.mar.29_DE.MGSW_ZFMK19539	50.8953	11.7527	50.6319	6.4731	372.17	0.0319635
	G.mar.06_DE.MGSO_ZFMK2503693	G.mar.29_DE.MGSW_ZFMK19539	50.9194	11.5479	50.6319	6.4731	357.967	0.0319635
	G.mar.07_DE.MGSO_ZFMK2503694	G.mar.29_DE.MGSW_ZFMK19539	50.9194	11.5479	50.6319	6.4731	357.967	0.0319635
	G.mar.08_DE.MGSO_ZFMK2542470	G.mar.29_DE.MGSW_ZFMK19539	50.892	11.8209	50.6319	6.4731	376.931	0.0319635
	G.mar.09_DE.MGSO_ZFMK2542471	G.mar.29_DE.MGSW_ZFMK19539	50.892	11.8209	50.6319	6.4731	376.931	0.0334855
	G.mar.10_DE.MGSO_ZFMK2542541	G.mar.29_DE.MGSW_ZFMK19539	51.133	11.7487	50.6319	6.4731	373.958	0.0319635
	G.mar.11_DE.MGSO_ZFMK2542542	G.mar.29_DE.MGSW_ZFMK19539	51.133	11.7487	50.6319	6.4731	373.958	0.0319635
	G.mar.12_DE.MGSW_ZFMK18967	G.mar.29_DE.MGSW_ZFMK19539	50.6627	7.1026	50.6319	6.4731	44.4885	0.0319635
	G.mar.13_DE.MGSW_ZFMK18987	G.mar.29_DE.MGSW_ZFMK19539	50.6659	7.2156	50.6319	6.4731	52.4535	0.0319635
	G.mar.14_DE.MGSW_ZFMK18988	G.mar.29_DE.MGSW_ZFMK19539	50.6867	7.2997	50.6319	6.4731	58.5476	0.0334855
	G.mar.15_DE.MGSW_ZFMK18991	G.mar.29_DE.MGSW_ZFMK19539	50.7667	7.3667	50.6319	6.4731	64.6553	0.0334855
	G.mar.16_DE.MGSW_ZFMK19003	G.mar.29_DE.MGSW_ZFMK19539	51.361	7.5499	50.6319	6.4731	110.614	0.0334855
	G.mar.17_DE.MGSW_ZFMK19005	G.mar.29_DE.MGSW_ZFMK19539	51.361	7.5499	50.6319	6.4731	110.614	0.0304414
	G.mar.18_DE.MGSW_ZFMK19029	G.mar.29_DE.MGSW_ZFMK19539	50.56	6.8078	50.6319	6.4731	24.9252	0.00152207
	G.mar.19_DE.MGSW_ZFMK19031	G.mar.29_DE.MGSW_ZFMK19539	51.2299	7.054	50.6319	6.4731	77.9175	0.0197869
	G.mar.20_DE.MGSW_ZFMK19044	G.mar.29_DE.MGSW_ZFMK19539	50.8026	7.2418	50.6319	6.4731	57.3144	0.0334855
	G.mar.21_DE.MGSW_ZFMK19045	G.mar.29_DE.MGSW_ZFMK19539	51.3589	7.1697	50.6319	6.4731	94.3407	0.0319635
	G.mar.22_DE.MGSW_ZFMK19046	G.mar.29_DE.MGSW_ZFMK19539	51.2299	7.054	50.6319	6.4731	77.9175	0.0319635
	G.mar.23_DE.MGSW_ZFMK19047	G.mar.29_DE.MGSW_ZFMK19539	50.714	7.1772	50.6319	6.4731	50.4184	0.0334855
	G.mar.24_DE.MGSW_ZFMK19048	G.mar.29_DE.MGSW_ZFMK19539	50.6715	7.0469	50.6319	6.4731	40.6669	0.0304414
	G.mar.25_DE.MGSW_ZFMK19049	G.mar.29_DE.MGSW_ZFMK19539	51.291	7.2522	50.6319	6.4731	91.3116	0.0319635
	G.mar.26_DE.MGSW_ZFMK19051	G.mar.29_DE.MGSW_ZFMK19539	50.5511	7.1722	50.6319	6.4731	50.13	0.00152207
	G.mar.27_DE.MGSW_ZFMK19054	G.mar.29_DE.MGSW_ZFMK19539	50.4647	7.2225	50.6319	6.4731	56.0834	0.00152207
	G.mar.28_DE.MGSW_ZFMK19057	G.mar.29_DE.MGSW_ZFMK19539	51.361	7.5499	50.6319	6.4731	110.614	0.0319635
	G.mar.01_DE.MGSO_GBOL33714	G.mar.30_DE.MGSW_ZFMK19550	51.7429	10.7672	50.7797	8.0085	219.656	0.0106545
	G.mar.02_DE.MGSO_ZFMK100409275	G.mar.30_DE.MGSW_ZFMK19550	51.7435	10.7673	50.7797	8.0085	219.693	0
	G.mar.03_DE.MGSO_ZFMK1634	G.mar.30_DE.MGSW_ZFMK19550	51.841	10.326	50.7797	8.0085	199.546	0
	G.mar.04_DE.MGSO_ZFMK1909	G.mar.30_DE.MGSW_ZFMK19550	50.8953	11.7527	50.7797	8.0085	263.046	0.00913242
	G.mar.05_DE.MGSO_ZFMK19531	G.mar.30_DE.MGSW_ZFMK19550	50.8953	11.7527	50.7797	8.0085	263.046	0.00913242
	G.mar.06_DE.MGSO_ZFMK2503693	G.mar.30_DE.MGSW_ZFMK19550	50.9194	11.5479	50.7797	8.0085	248.784	0.00913242
	G.mar.07_DE.MGSO_ZFMK2503694	G.mar.30_DE.MGSW_ZFMK19550	50.9194	11.5479	50.7797	8.0085	248.784	0.00913242
	G.mar.08_DE.MGSO_ZFMK2542470	G.mar.30_DE.MGSW_ZFMK19550	50.892	11.8209	50.7797	8.0085	267.817	0.00913242
	G.mar.09_DE.MGSO_ZFMK2542471	G.mar.30_DE.MGSW_ZFMK19550	50.892	11.8209	50.7797	8.0085	267.817	0.0106545
	G.mar.10_DE.MGSO_ZFMK2542541	G.mar.30_DE.MGSW_ZFMK19550	51.133	11.7487	50.7797	8.0085	264.708	0.00913242
	G.mar.11_DE.MGSO_ZFMK2542542	G.mar.30_DE.MGSW_ZFMK19550	51.133	11.7487	50.7797	8.0085	264.708	0.00913242
	G.mar.12_DE.MGSW_ZFMK18967	G.mar.30_DE.MGSW_ZFMK19550	50.6627	7.1026	50.7797	8.0085	65.0447	0
	G.mar.13_DE.MGSW_ZFMK18987	G.mar.30_DE.MGSW_ZFMK19550	50.6659	7.2156	50.7797	8.0085	57.196	0
	G.mar.14_DE.MGSW_ZFMK18988	G.mar.30_DE.MGSW_ZFMK19550	50.6867	7.2997	50.7797	8.0085	50.9129	0.00152207
	G.mar.15_DE.MGSW_ZFMK18991	G.mar.30_DE.MGSW_ZFMK19550	50.7667	7.3667	50.7797	8.0085	45.1252	0.00152207
	G.mar.16_DE.MGSW_ZFMK19003	G.mar.30_DE.MGSW_ZFMK19550	51.361	7.5499	50.7797	8.0085	72.0984	0.00152207
	G.mar.17_DE.MGSW_ZFMK19005	G.mar.30_DE.MGSW_ZFMK19550	51.361	7.5499	50.7797	8.0085	72.0984	0.00152207
	G.mar.18_DE.MGSW_ZFMK19029	G.mar.30_DE.MGSW_ZFMK19550	50.56	6.8078	50.7797	8.0085	88.0176	0.0304414
	G.mar.19_DE.MGSW_ZFMK19031	G.mar.30_DE.MGSW_ZFMK19550	51.2299	7.054	50.7797	8.0085	83.4115	0.0121766
	G.mar.20_DE.MGSW_ZFMK19044	G.mar.30_DE.MGSW_ZFMK19550	50.8026	7.2418	50.7797	8.0085	53.9187	0.00152207
	G.mar.21_DE.MGSW_ZFMK19045	G.mar.30_DE.MGSW_ZFMK19550	51.3589	7.1697	50.7797	8.0085	87.0242	0
	G.mar.22_DE.MGSW_ZFMK19046	G.mar.30_DE.MGSW_ZFMK19550	51.2299	7.054	50.7797	8.0085	83.4115	0
	G.mar.23_DE.MGSW_ZFMK19047	G.mar.30_DE.MGSW_ZFMK19550	50.714	7.1772	50.7797	8.0085	58.9061	0.00152207
	G.mar.24_DE.MGSW_ZFMK19048	G.mar.30_DE.MGSW_ZFMK19550	50.6715	7.0469	50.7797	8.0085	68.7046	0.00152207
	G.mar.25_DE.MGSW_ZFMK19049	G.mar.30_DE.MGSW_ZFMK19550	51.291	7.2522	50.7797	8.0085	77.5973	0
	G.mar.26_DE.MGSW_ZFMK19051	G.mar.30_DE.MGSW_ZFMK19550	50.5511	7.1722	50.7797	8.0085	64.1496	0.0304414
	G.mar.27_DE.MGSW_ZFMK19054	G.mar.30_DE.MGSW_ZFMK19550	50.4647	7.2225	50.7797	8.0085	65.5435	0.0304414
	G.mar.28_DE.MGSW_ZFMK19057	G.mar.30_DE.MGSW_ZFMK19550	51.361	7.5499	50.7797	8.0085	72.0984	0
	G.mar.29_DE.MGSW_ZFMK19539	G.mar.30_DE.MGSW_ZFMK19550	50.6319	6.4731	50.7797	8.0085	109.294	0.0319635
	G.mar.01_DE.MGSO_GBOL33714	G.mar.31_DE.MGSW_ZFMK19555	51.7429	10.7672	50.7797	8.0085	219.656	0.0197869
	G.mar.02_DE.MGSO_ZFMK100409275	G.mar.31_DE.MGSW_ZFMK19555	51.7435	10.7673	50.7797	8.0085	219.693	0.0182648
	G.mar.03_DE.MGSO_ZFMK1634	G.mar.31_DE.MGSW_ZFMK19555	51.841	10.326	50.7797	8.0085	199.546	0.0182648
	G.mar.04_DE.MGSO_ZFMK1909	G.mar.31_DE.MGSW_ZFMK19555	50.8953	11.7527	50.7797	8.0085	263.046	0.0182648
	G.mar.05_DE.MGSO_ZFMK19531	G.mar.31_DE.MGSW_ZFMK19555	50.8953	11.7527	50.7797	8.0085	263.046	0.0182648
	G.mar.06_DE.MGSO_ZFMK2503693	G.mar.31_DE.MGSW_ZFMK19555	50.9194	11.5479	50.7797	8.0085	248.784	0.0182648
	G.mar.07_DE.MGSO_ZFMK2503694	G.mar.31_DE.MGSW_ZFMK19555	50.9194	11.5479	50.7797	8.0085	248.784	0.0182648
	G.mar.08_DE.MGSO_ZFMK2542470	G.mar.31_DE.MGSW_ZFMK19555	50.892	11.8209	50.7797	8.0085	267.817	0.0182648
	G.mar.09_DE.MGSO_ZFMK2542471	G.mar.31_DE.MGSW_ZFMK19555	50.892	11.8209	50.7797	8.0085	267.817	0.0197869
	G.mar.10_DE.MGSO_ZFMK2542541	G.mar.31_DE.MGSW_ZFMK19555	51.133	11.7487	50.7797	8.0085	264.708	0.0182648
	G.mar.11_DE.MGSO_ZFMK2542542	G.mar.31_DE.MGSW_ZFMK19555	51.133	11.7487	50.7797	8.0085	264.708	0.0182648
	G.mar.12_DE.MGSW_ZFMK18967	G.mar.31_DE.MGSW_ZFMK19555	50.6627	7.1026	50.7797	8.0085	65.0447	0.0182648
	G.mar.13_DE.MGSW_ZFMK18987	G.mar.31_DE.MGSW_ZFMK19555	50.6659	7.2156	50.7797	8.0085	57.196	0.0182648
	G.mar.14_DE.MGSW_ZFMK18988	G.mar.31_DE.MGSW_ZFMK19555	50.6867	7.2997	50.7797	8.0085	50.9129	0.0197869
	G.mar.15_DE.MGSW_ZFMK18991	G.mar.31_DE.MGSW_ZFMK19555	50.7667	7.3667	50.7797	8.0085	45.1252	0.0197869
	G.mar.16_DE.MGSW_ZFMK19003	G.mar.31_DE.MGSW_ZFMK19555	51.361	7.5499	50.7797	8.0085	72.0984	0.0197869
	G.mar.17_DE.MGSW_ZFMK19005	G.mar.31_DE.MGSW_ZFMK19555	51.361	7.5499	50.7797	8.0085	72.0984	0.0167428
	G.mar.18_DE.MGSW_ZFMK19029	G.mar.31_DE.MGSW_ZFMK19555	50.56	6.8078	50.7797	8.0085	88.0176	0.0182648
	G.mar.19_DE.MGSW_ZFMK19031	G.mar.31_DE.MGSW_ZFMK19555	51.2299	7.054	50.7797	8.0085	83.4115	0.0121766
	G.mar.20_DE.MGSW_ZFMK19044	G.mar.31_DE.MGSW_ZFMK19555	50.8026	7.2418	50.7797	8.0085	53.9187	0.0197869
	G.mar.21_DE.MGSW_ZFMK19045	G.mar.31_DE.MGSW_ZFMK19555	51.3589	7.1697	50.7797	8.0085	87.0242	0.0182648
	G.mar.22_DE.MGSW_ZFMK19046	G.mar.31_DE.MGSW_ZFMK19555	51.2299	7.054	50.7797	8.0085	83.4115	0.0182648
	G.mar.23_DE.MGSW_ZFMK19047	G.mar.31_DE.MGSW_ZFMK19555	50.714	7.1772	50.7797	8.0085	58.9061	0.0197869
	G.mar.24_DE.MGSW_ZFMK19048	G.mar.31_DE.MGSW_ZFMK19555	50.6715	7.0469	50.7797	8.0085	68.7046	0.0197869
	G.mar.25_DE.MGSW_ZFMK19049	G.mar.31_DE.MGSW_ZFMK19555	51.291	7.2522	50.7797	8.0085	77.5973	0.0182648
	G.mar.26_DE.MGSW_ZFMK19051	G.mar.31_DE.MGSW_ZFMK19555	50.5511	7.1722	50.7797	8.0085	64.1496	0.0182648
	G.mar.27_DE.MGSW_ZFMK19054	G.mar.31_DE.MGSW_ZFMK19555	50.4647	7.2225	50.7797	8.0085	65.5435	0.0182648
	G.mar.28_DE.MGSW_ZFMK19057	G.mar.31_DE.MGSW_ZFMK19555	51.361	7.5499	50.7797	8.0085	72.0984	0.0182648
	G.mar.29_DE.MGSW_ZFMK19539	G.mar.31_DE.MGSW_ZFMK19555	50.6319	6.4731	50.7797	8.0085	109.294	0.0167428
	G.mar.30_DE.MGSW_ZFMK19550	G.mar.31_DE.MGSW_ZFMK19555	50.7797	8.0085	50.7797	8.0085	0	0.0182648
	G.mar.01_DE.MGSO_GBOL33714	G.mar.32_DE.MGSW_ZFMK19558	51.7429	10.7672	50.7093	7.7132	241.557	0.0121766
	G.mar.02_DE.MGSO_ZFMK100409275	G.mar.32_DE.MGSW_ZFMK19558	51.7435	10.7673	50.7093	7.7132	241.594	0.00152207
	G.mar.03_DE.MGSO_ZFMK1634	G.mar.32_DE.MGSW_ZFMK19558	51.841	10.326	50.7093	7.7132	220.902	0.00152207
	G.mar.04_DE.MGSO_ZFMK1909	G.mar.32_DE.MGSW_ZFMK19558	50.8953	11.7527	50.7093	7.7132	284.414	0.0106545
	G.mar.05_DE.MGSO_ZFMK19531	G.mar.32_DE.MGSW_ZFMK19558	50.8953	11.7527	50.7093	7.7132	284.414	0.0106545
	G.mar.06_DE.MGSO_ZFMK2503693	G.mar.32_DE.MGSW_ZFMK19558	50.9194	11.5479	50.7093	7.7132	270.224	0.0106545
	G.mar.07_DE.MGSO_ZFMK2503694	G.mar.32_DE.MGSW_ZFMK19558	50.9194	11.5479	50.7093	7.7132	270.224	0.0106545
	G.mar.08_DE.MGSO_ZFMK2542470	G.mar.32_DE.MGSW_ZFMK19558	50.892	11.8209	50.7093	7.7132	289.173	0.0106545
	G.mar.09_DE.MGSO_ZFMK2542471	G.mar.32_DE.MGSW_ZFMK19558	50.892	11.8209	50.7093	7.7132	289.173	0.0121766
	G.mar.10_DE.MGSO_ZFMK2542541	G.mar.32_DE.MGSW_ZFMK19558	51.133	11.7487	50.7093	7.7132	286.551	0.0106545
	G.mar.11_DE.MGSO_ZFMK2542542	G.mar.32_DE.MGSW_ZFMK19558	51.133	11.7487	50.7093	7.7132	286.551	0.0106545
	G.mar.12_DE.MGSW_ZFMK18967	G.mar.32_DE.MGSW_ZFMK19558	50.6627	7.1026	50.7093	7.7132	43.3003	0.00152207
	G.mar.13_DE.MGSW_ZFMK18987	G.mar.32_DE.MGSW_ZFMK19558	50.6659	7.2156	50.7093	7.7132	35.3629	0.00152207
	G.mar.14_DE.MGSW_ZFMK18988	G.mar.32_DE.MGSW_ZFMK19558	50.6867	7.2997	50.7093	7.7132	29.2134	0.00304414
	G.mar.15_DE.MGSW_ZFMK18991	G.mar.32_DE.MGSW_ZFMK19558	50.7667	7.3667	50.7093	7.7132	25.1894	0.00304414
	G.mar.16_DE.MGSW_ZFMK19003	G.mar.32_DE.MGSW_ZFMK19558	51.361	7.5499	50.7093	7.7132	73.3137	0.00152207
	G.mar.17_DE.MGSW_ZFMK19005	G.mar.32_DE.MGSW_ZFMK19558	51.361	7.5499	50.7093	7.7132	73.3137	0.00304414
	G.mar.18_DE.MGSW_ZFMK19029	G.mar.32_DE.MGSW_ZFMK19558	50.56	6.8078	50.7093	7.7132	65.9359	0.0319635
	G.mar.19_DE.MGSW_ZFMK19031	G.mar.32_DE.MGSW_ZFMK19558	51.2299	7.054	50.7093	7.7132	73.9914	0.0136986
	G.mar.20_DE.MGSW_ZFMK19044	G.mar.32_DE.MGSW_ZFMK19558	50.8026	7.2418	50.7093	7.7132	34.7236	0.00304414
	G.mar.21_DE.MGSW_ZFMK19045	G.mar.32_DE.MGSW_ZFMK19558	51.3589	7.1697	50.7093	7.7132	81.5683	0.00152207
	G.mar.22_DE.MGSW_ZFMK19046	G.mar.32_DE.MGSW_ZFMK19558	51.2299	7.054	50.7093	7.7132	73.9914	0.00152207
	G.mar.23_DE.MGSW_ZFMK19047	G.mar.32_DE.MGSW_ZFMK19558	50.714	7.1772	50.7093	7.7132	37.7203	0.00304414
	G.mar.24_DE.MGSW_ZFMK19048	G.mar.32_DE.MGSW_ZFMK19558	50.6715	7.0469	50.7093	7.7132	47.0943	0.00304414
	G.mar.25_DE.MGSW_ZFMK19049	G.mar.32_DE.MGSW_ZFMK19558	51.291	7.2522	50.7093	7.7132	72.2345	0.00152207
	G.mar.26_DE.MGSW_ZFMK19051	G.mar.32_DE.MGSW_ZFMK19558	50.5511	7.1722	50.7093	7.7132	41.9916	0.0319635
	G.mar.27_DE.MGSW_ZFMK19054	G.mar.32_DE.MGSW_ZFMK19558	50.4647	7.2225	50.7093	7.7132	44.016	0.0319635
	G.mar.28_DE.MGSW_ZFMK19057	G.mar.32_DE.MGSW_ZFMK19558	51.361	7.5499	50.7093	7.7132	73.3137	0.00152207
	G.mar.29_DE.MGSW_ZFMK19539	G.mar.32_DE.MGSW_ZFMK19558	50.6319	6.4731	50.7093	7.7132	87.76	0.0334855
	G.mar.30_DE.MGSW_ZFMK19550	G.mar.32_DE.MGSW_ZFMK19558	50.7797	8.0085	50.7093	7.7132	22.1896	0.00152207
	G.mar.31_DE.MGSW_ZFMK19555	G.mar.32_DE.MGSW_ZFMK19558	50.7797	8.0085	50.7093	7.7132	22.1896	0.0197869
	G.mar.01_DE.MGSO_GBOL33714	G.mar.33_DE.MGSW_ZFMK19560	51.7429	10.7672	50.7093	7.7132	241.557	0.0106545
	G.mar.02_DE.MGSO_ZFMK100409275	G.mar.33_DE.MGSW_ZFMK19560	51.7435	10.7673	50.7093	7.7132	241.594	0
	G.mar.03_DE.MGSO_ZFMK1634	G.mar.33_DE.MGSW_ZFMK19560	51.841	10.326	50.7093	7.7132	220.902	0
	G.mar.04_DE.MGSO_ZFMK1909	G.mar.33_DE.MGSW_ZFMK19560	50.8953	11.7527	50.7093	7.7132	284.414	0.00913242
	G.mar.05_DE.MGSO_ZFMK19531	G.mar.33_DE.MGSW_ZFMK19560	50.8953	11.7527	50.7093	7.7132	284.414	0.00913242
	G.mar.06_DE.MGSO_ZFMK2503693	G.mar.33_DE.MGSW_ZFMK19560	50.9194	11.5479	50.7093	7.7132	270.224	0.00913242
	G.mar.07_DE.MGSO_ZFMK2503694	G.mar.33_DE.MGSW_ZFMK19560	50.9194	11.5479	50.7093	7.7132	270.224	0.00913242
	G.mar.08_DE.MGSO_ZFMK2542470	G.mar.33_DE.MGSW_ZFMK19560	50.892	11.8209	50.7093	7.7132	289.173	0.00913242
	G.mar.09_DE.MGSO_ZFMK2542471	G.mar.33_DE.MGSW_ZFMK19560	50.892	11.8209	50.7093	7.7132	289.173	0.0106545
	G.mar.10_DE.MGSO_ZFMK2542541	G.mar.33_DE.MGSW_ZFMK19560	51.133	11.7487	50.7093	7.7132	286.551	0.00913242
	G.mar.11_DE.MGSO_ZFMK2542542	G.mar.33_DE.MGSW_ZFMK19560	51.133	11.7487	50.7093	7.7132	286.551	0.00913242
	G.mar.12_DE.MGSW_ZFMK18967	G.mar.33_DE.MGSW_ZFMK19560	50.6627	7.1026	50.7093	7.7132	43.3003	0
	G.mar.13_DE.MGSW_ZFMK18987	G.mar.33_DE.MGSW_ZFMK19560	50.6659	7.2156	50.7093	7.7132	35.3629	0
	G.mar.14_DE.MGSW_ZFMK18988	G.mar.33_DE.MGSW_ZFMK19560	50.6867	7.2997	50.7093	7.7132	29.2134	0.00152207
	G.mar.15_DE.MGSW_ZFMK18991	G.mar.33_DE.MGSW_ZFMK19560	50.7667	7.3667	50.7093	7.7132	25.1894	0.00152207
	G.mar.16_DE.MGSW_ZFMK19003	G.mar.33_DE.MGSW_ZFMK19560	51.361	7.5499	50.7093	7.7132	73.3137	0.00152207
	G.mar.17_DE.MGSW_ZFMK19005	G.mar.33_DE.MGSW_ZFMK19560	51.361	7.5499	50.7093	7.7132	73.3137	0.00152207
	G.mar.18_DE.MGSW_ZFMK19029	G.mar.33_DE.MGSW_ZFMK19560	50.56	6.8078	50.7093	7.7132	65.9359	0.0304414
	G.mar.19_DE.MGSW_ZFMK19031	G.mar.33_DE.MGSW_ZFMK19560	51.2299	7.054	50.7093	7.7132	73.9914	0.0121766
	G.mar.20_DE.MGSW_ZFMK19044	G.mar.33_DE.MGSW_ZFMK19560	50.8026	7.2418	50.7093	7.7132	34.7236	0.00152207
	G.mar.21_DE.MGSW_ZFMK19045	G.mar.33_DE.MGSW_ZFMK19560	51.3589	7.1697	50.7093	7.7132	81.5683	0
	G.mar.22_DE.MGSW_ZFMK19046	G.mar.33_DE.MGSW_ZFMK19560	51.2299	7.054	50.7093	7.7132	73.9914	0
	G.mar.23_DE.MGSW_ZFMK19047	G.mar.33_DE.MGSW_ZFMK19560	50.714	7.1772	50.7093	7.7132	37.7203	0.00152207
	G.mar.24_DE.MGSW_ZFMK19048	G.mar.33_DE.MGSW_ZFMK19560	50.6715	7.0469	50.7093	7.7132	47.0943	0.00152207
	G.mar.25_DE.MGSW_ZFMK19049	G.mar.33_DE.MGSW_ZFMK19560	51.291	7.2522	50.7093	7.7132	72.2345	0
	G.mar.26_DE.MGSW_ZFMK19051	G.mar.33_DE.MGSW_ZFMK19560	50.5511	7.1722	50.7093	7.7132	41.9916	0.0304414
	G.mar.27_DE.MGSW_ZFMK19054	G.mar.33_DE.MGSW_ZFMK19560	50.4647	7.2225	50.7093	7.7132	44.016	0.0304414
	G.mar.28_DE.MGSW_ZFMK19057	G.mar.33_DE.MGSW_ZFMK19560	51.361	7.5499	50.7093	7.7132	73.3137	0
	G.mar.29_DE.MGSW_ZFMK19539	G.mar.33_DE.MGSW_ZFMK19560	50.6319	6.4731	50.7093	7.7132	87.76	0.0319635
	G.mar.30_DE.MGSW_ZFMK19550	G.mar.33_DE.MGSW_ZFMK19560	50.7797	8.0085	50.7093	7.7132	22.1896	0
	G.mar.31_DE.MGSW_ZFMK19555	G.mar.33_DE.MGSW_ZFMK19560	50.7797	8.0085	50.7093	7.7132	22.1896	0.0182648
	G.mar.32_DE.MGSW_ZFMK19558	G.mar.33_DE.MGSW_ZFMK19560	50.7093	7.7132	50.7093	7.7132	0	0.00152207
	G.mar.01_DE.MGSO_GBOL33714	G.mar.34_DE.MGSW_ZFMK19561	51.7429	10.7672	50.7093	7.7132	241.557	0.0106545
	G.mar.02_DE.MGSO_ZFMK100409275	G.mar.34_DE.MGSW_ZFMK19561	51.7435	10.7673	50.7093	7.7132	241.594	0
	G.mar.03_DE.MGSO_ZFMK1634	G.mar.34_DE.MGSW_ZFMK19561	51.841	10.326	50.7093	7.7132	220.902	0
	G.mar.04_DE.MGSO_ZFMK1909	G.mar.34_DE.MGSW_ZFMK19561	50.8953	11.7527	50.7093	7.7132	284.414	0.00913242
	G.mar.05_DE.MGSO_ZFMK19531	G.mar.34_DE.MGSW_ZFMK19561	50.8953	11.7527	50.7093	7.7132	284.414	0.00913242
	G.mar.06_DE.MGSO_ZFMK2503693	G.mar.34_DE.MGSW_ZFMK19561	50.9194	11.5479	50.7093	7.7132	270.224	0.00913242
	G.mar.07_DE.MGSO_ZFMK2503694	G.mar.34_DE.MGSW_ZFMK19561	50.9194	11.5479	50.7093	7.7132	270.224	0.00913242
	G.mar.08_DE.MGSO_ZFMK2542470	G.mar.34_DE.MGSW_ZFMK19561	50.892	11.8209	50.7093	7.7132	289.173	0.00913242
	G.mar.09_DE.MGSO_ZFMK2542471	G.mar.34_DE.MGSW_ZFMK19561	50.892	11.8209	50.7093	7.7132	289.173	0.0106545
	G.mar.10_DE.MGSO_ZFMK2542541	G.mar.34_DE.MGSW_ZFMK19561	51.133	11.7487	50.7093	7.7132	286.551	0.00913242
	G.mar.11_DE.MGSO_ZFMK2542542	G.mar.34_DE.MGSW_ZFMK19561	51.133	11.7487	50.7093	7.7132	286.551	0.00913242
	G.mar.12_DE.MGSW_ZFMK18967	G.mar.34_DE.MGSW_ZFMK19561	50.6627	7.1026	50.7093	7.7132	43.3003	0
	G.mar.13_DE.MGSW_ZFMK18987	G.mar.34_DE.MGSW_ZFMK19561	50.6659	7.2156	50.7093	7.7132	35.3629	0
	G.mar.14_DE.MGSW_ZFMK18988	G.mar.34_DE.MGSW_ZFMK19561	50.6867	7.2997	50.7093	7.7132	29.2134	0.00152207
	G.mar.15_DE.MGSW_ZFMK18991	G.mar.34_DE.MGSW_ZFMK19561	50.7667	7.3667	50.7093	7.7132	25.1894	0.00152207
	G.mar.16_DE.MGSW_ZFMK19003	G.mar.34_DE.MGSW_ZFMK19561	51.361	7.5499	50.7093	7.7132	73.3137	0.00152207
	G.mar.17_DE.MGSW_ZFMK19005	G.mar.34_DE.MGSW_ZFMK19561	51.361	7.5499	50.7093	7.7132	73.3137	0.00152207
	G.mar.18_DE.MGSW_ZFMK19029	G.mar.34_DE.MGSW_ZFMK19561	50.56	6.8078	50.7093	7.7132	65.9359	0.0304414
	G.mar.19_DE.MGSW_ZFMK19031	G.mar.34_DE.MGSW_ZFMK19561	51.2299	7.054	50.7093	7.7132	73.9914	0.0121766
	G.mar.20_DE.MGSW_ZFMK19044	G.mar.34_DE.MGSW_ZFMK19561	50.8026	7.2418	50.7093	7.7132	34.7236	0.00152207
	G.mar.21_DE.MGSW_ZFMK19045	G.mar.34_DE.MGSW_ZFMK19561	51.3589	7.1697	50.7093	7.7132	81.5683	0
	G.mar.22_DE.MGSW_ZFMK19046	G.mar.34_DE.MGSW_ZFMK19561	51.2299	7.054	50.7093	7.7132	73.9914	0
	G.mar.23_DE.MGSW_ZFMK19047	G.mar.34_DE.MGSW_ZFMK19561	50.714	7.1772	50.7093	7.7132	37.7203	0.00152207
	G.mar.24_DE.MGSW_ZFMK19048	G.mar.34_DE.MGSW_ZFMK19561	50.6715	7.0469	50.7093	7.7132	47.0943	0.00152207
	G.mar.25_DE.MGSW_ZFMK19049	G.mar.34_DE.MGSW_ZFMK19561	51.291	7.2522	50.7093	7.7132	72.2345	0
	G.mar.26_DE.MGSW_ZFMK19051	G.mar.34_DE.MGSW_ZFMK19561	50.5511	7.1722	50.7093	7.7132	41.9916	0.0304414
	G.mar.27_DE.MGSW_ZFMK19054	G.mar.34_DE.MGSW_ZFMK19561	50.4647	7.2225	50.7093	7.7132	44.016	0.0304414
	G.mar.28_DE.MGSW_ZFMK19057	G.mar.34_DE.MGSW_ZFMK19561	51.361	7.5499	50.7093	7.7132	73.3137	0
	G.mar.29_DE.MGSW_ZFMK19539	G.mar.34_DE.MGSW_ZFMK19561	50.6319	6.4731	50.7093	7.7132	87.76	0.0319635
	G.mar.30_DE.MGSW_ZFMK19550	G.mar.34_DE.MGSW_ZFMK19561	50.7797	8.0085	50.7093	7.7132	22.1896	0
	G.mar.31_DE.MGSW_ZFMK19555	G.mar.34_DE.MGSW_ZFMK19561	50.7797	8.0085	50.7093	7.7132	22.1896	0.0182648
	G.mar.32_DE.MGSW_ZFMK19558	G.mar.34_DE.MGSW_ZFMK19561	50.7093	7.7132	50.7093	7.7132	0	0.00152207
	G.mar.33_DE.MGSW_ZFMK19560	G.mar.34_DE.MGSW_ZFMK19561	50.7093	7.7132	50.7093	7.7132	0	0
	G.mar.01_DE.MGSO_GBOL33714	G.mar.35_DE.MGSW_ZFMK2516208	51.7429	10.7672	50.6245	7.1936	278.182	0.0152207
	G.mar.02_DE.MGSO_ZFMK100409275	G.mar.35_DE.MGSW_ZFMK2516208	51.7435	10.7673	50.6245	7.1936	278.217	0.0167428
	G.mar.03_DE.MGSO_ZFMK1634	G.mar.35_DE.MGSW_ZFMK2516208	51.841	10.326	50.6245	7.1936	256.443	0.0167428
	G.mar.04_DE.MGSO_ZFMK1909	G.mar.35_DE.MGSW_ZFMK2516208	50.8953	11.7527	50.6245	7.1936	321.838	0.0136986
	G.mar.05_DE.MGSO_ZFMK19531	G.mar.35_DE.MGSW_ZFMK2516208	50.8953	11.7527	50.6245	7.1936	321.838	0.0136986
	G.mar.06_DE.MGSO_ZFMK2503693	G.mar.35_DE.MGSW_ZFMK2516208	50.9194	11.5479	50.6245	7.1936	307.709	0.0136986
	G.mar.07_DE.MGSO_ZFMK2503694	G.mar.35_DE.MGSW_ZFMK2516208	50.9194	11.5479	50.6245	7.1936	307.709	0.0136986
	G.mar.08_DE.MGSO_ZFMK2542470	G.mar.35_DE.MGSW_ZFMK2516208	50.892	11.8209	50.6245	7.1936	326.587	0.0136986
	G.mar.09_DE.MGSO_ZFMK2542471	G.mar.35_DE.MGSW_ZFMK2516208	50.892	11.8209	50.6245	7.1936	326.587	0.0152207
	G.mar.10_DE.MGSO_ZFMK2542541	G.mar.35_DE.MGSW_ZFMK2516208	51.133	11.7487	50.6245	7.1936	324.29	0.0136986
	G.mar.11_DE.MGSO_ZFMK2542542	G.mar.35_DE.MGSW_ZFMK2516208	51.133	11.7487	50.6245	7.1936	324.29	0.0136986
	G.mar.12_DE.MGSW_ZFMK18967	G.mar.35_DE.MGSW_ZFMK2516208	50.6627	7.1026	50.6245	7.1936	7.69041	0.0167428
	G.mar.13_DE.MGSW_ZFMK18987	G.mar.35_DE.MGSW_ZFMK2516208	50.6659	7.2156	50.6245	7.1936	4.85476	0.0167428
	G.mar.14_DE.MGSW_ZFMK18988	G.mar.35_DE.MGSW_ZFMK2516208	50.6867	7.2997	50.6245	7.1936	10.1808	0.0182648
	G.mar.15_DE.MGSW_ZFMK18991	G.mar.35_DE.MGSW_ZFMK2516208	50.7667	7.3667	50.6245	7.1936	19.9542	0.0182648
	G.mar.16_DE.MGSW_ZFMK19003	G.mar.35_DE.MGSW_ZFMK2516208	51.361	7.5499	50.6245	7.1936	85.5535	0.0182648
	G.mar.17_DE.MGSW_ZFMK19005	G.mar.35_DE.MGSW_ZFMK2516208	51.361	7.5499	50.6245	7.1936	85.5535	0.0152207
	G.mar.18_DE.MGSW_ZFMK19029	G.mar.35_DE.MGSW_ZFMK2516208	50.56	6.8078	50.6245	7.1936	28.1446	0.0289193
	G.mar.19_DE.MGSW_ZFMK19031	G.mar.35_DE.MGSW_ZFMK2516208	51.2299	7.054	50.6245	7.1936	67.982	0.0136986
	G.mar.20_DE.MGSW_ZFMK19044	G.mar.35_DE.MGSW_ZFMK2516208	50.8026	7.2418	50.6245	7.1936	20.0799	0.0182648
	G.mar.21_DE.MGSW_ZFMK19045	G.mar.35_DE.MGSW_ZFMK2516208	51.3589	7.1697	50.6245	7.1936	81.6274	0.0167428
	G.mar.22_DE.MGSW_ZFMK19046	G.mar.35_DE.MGSW_ZFMK2516208	51.2299	7.054	50.6245	7.1936	67.982	0.0167428
	G.mar.23_DE.MGSW_ZFMK19047	G.mar.35_DE.MGSW_ZFMK2516208	50.714	7.1772	50.6245	7.1936	10.0125	0.0182648
	G.mar.24_DE.MGSW_ZFMK19048	G.mar.35_DE.MGSW_ZFMK2516208	50.6715	7.0469	50.6245	7.1936	11.5814	0.0152207
	G.mar.25_DE.MGSW_ZFMK19049	G.mar.35_DE.MGSW_ZFMK2516208	51.291	7.2522	50.6245	7.1936	74.1784	0.0167428
	G.mar.26_DE.MGSW_ZFMK19051	G.mar.35_DE.MGSW_ZFMK2516208	50.5511	7.1722	50.6245	7.1936	8.29515	0.0289193
	G.mar.27_DE.MGSW_ZFMK19054	G.mar.35_DE.MGSW_ZFMK2516208	50.4647	7.2225	50.6245	7.1936	17.8747	0.0289193
	G.mar.28_DE.MGSW_ZFMK19057	G.mar.35_DE.MGSW_ZFMK2516208	51.361	7.5499	50.6245	7.1936	85.5535	0.0167428
	G.mar.29_DE.MGSW_ZFMK19539	G.mar.35_DE.MGSW_ZFMK2516208	50.6319	6.4731	50.6245	7.1936	50.7961	0.0304414
	G.mar.30_DE.MGSW_ZFMK19550	G.mar.35_DE.MGSW_ZFMK2516208	50.7797	8.0085	50.6245	7.1936	59.8904	0.0167428
	G.mar.31_DE.MGSW_ZFMK19555	G.mar.35_DE.MGSW_ZFMK2516208	50.7797	8.0085	50.6245	7.1936	59.8904	0.0258752
	G.mar.32_DE.MGSW_ZFMK19558	G.mar.35_DE.MGSW_ZFMK2516208	50.7093	7.7132	50.6245	7.1936	37.7912	0.0182648
	G.mar.33_DE.MGSW_ZFMK19560	G.mar.35_DE.MGSW_ZFMK2516208	50.7093	7.7132	50.6245	7.1936	37.7912	0.0167428
	G.mar.34_DE.MGSW_ZFMK19561	G.mar.35_DE.MGSW_ZFMK2516208	50.7093	7.7132	50.6245	7.1936	37.7912	0.0167428
	G.mar.01_DE.MGSO_GBOL33714	G.mar.36_DE.MGSW_ZFMK2516209	51.7429	10.7672	50.6245	7.1936	278.182	0.0152207
	G.mar.02_DE.MGSO_ZFMK100409275	G.mar.36_DE.MGSW_ZFMK2516209	51.7435	10.7673	50.6245	7.1936	278.217	0.0167428
	G.mar.03_DE.MGSO_ZFMK1634	G.mar.36_DE.MGSW_ZFMK2516209	51.841	10.326	50.6245	7.1936	256.443	0.0167428
	G.mar.04_DE.MGSO_ZFMK1909	G.mar.36_DE.MGSW_ZFMK2516209	50.8953	11.7527	50.6245	7.1936	321.838	0.0136986
	G.mar.05_DE.MGSO_ZFMK19531	G.mar.36_DE.MGSW_ZFMK2516209	50.8953	11.7527	50.6245	7.1936	321.838	0.0136986
	G.mar.06_DE.MGSO_ZFMK2503693	G.mar.36_DE.MGSW_ZFMK2516209	50.9194	11.5479	50.6245	7.1936	307.709	0.0136986
	G.mar.07_DE.MGSO_ZFMK2503694	G.mar.36_DE.MGSW_ZFMK2516209	50.9194	11.5479	50.6245	7.1936	307.709	0.0136986
	G.mar.08_DE.MGSO_ZFMK2542470	G.mar.36_DE.MGSW_ZFMK2516209	50.892	11.8209	50.6245	7.1936	326.587	0.0136986
	G.mar.09_DE.MGSO_ZFMK2542471	G.mar.36_DE.MGSW_ZFMK2516209	50.892	11.8209	50.6245	7.1936	326.587	0.0152207
	G.mar.10_DE.MGSO_ZFMK2542541	G.mar.36_DE.MGSW_ZFMK2516209	51.133	11.7487	50.6245	7.1936	324.29	0.0136986
	G.mar.11_DE.MGSO_ZFMK2542542	G.mar.36_DE.MGSW_ZFMK2516209	51.133	11.7487	50.6245	7.1936	324.29	0.0136986
	G.mar.12_DE.MGSW_ZFMK18967	G.mar.36_DE.MGSW_ZFMK2516209	50.6627	7.1026	50.6245	7.1936	7.69041	0.0167428
	G.mar.13_DE.MGSW_ZFMK18987	G.mar.36_DE.MGSW_ZFMK2516209	50.6659	7.2156	50.6245	7.1936	4.85476	0.0167428
	G.mar.14_DE.MGSW_ZFMK18988	G.mar.36_DE.MGSW_ZFMK2516209	50.6867	7.2997	50.6245	7.1936	10.1808	0.0182648
	G.mar.15_DE.MGSW_ZFMK18991	G.mar.36_DE.MGSW_ZFMK2516209	50.7667	7.3667	50.6245	7.1936	19.9542	0.0182648
	G.mar.16_DE.MGSW_ZFMK19003	G.mar.36_DE.MGSW_ZFMK2516209	51.361	7.5499	50.6245	7.1936	85.5535	0.0182648
	G.mar.17_DE.MGSW_ZFMK19005	G.mar.36_DE.MGSW_ZFMK2516209	51.361	7.5499	50.6245	7.1936	85.5535	0.0152207
	G.mar.18_DE.MGSW_ZFMK19029	G.mar.36_DE.MGSW_ZFMK2516209	50.56	6.8078	50.6245	7.1936	28.1446	0.0289193
	G.mar.19_DE.MGSW_ZFMK19031	G.mar.36_DE.MGSW_ZFMK2516209	51.2299	7.054	50.6245	7.1936	67.982	0.0136986
	G.mar.20_DE.MGSW_ZFMK19044	G.mar.36_DE.MGSW_ZFMK2516209	50.8026	7.2418	50.6245	7.1936	20.0799	0.0182648
	G.mar.21_DE.MGSW_ZFMK19045	G.mar.36_DE.MGSW_ZFMK2516209	51.3589	7.1697	50.6245	7.1936	81.6274	0.0167428
	G.mar.22_DE.MGSW_ZFMK19046	G.mar.36_DE.MGSW_ZFMK2516209	51.2299	7.054	50.6245	7.1936	67.982	0.0167428
	G.mar.23_DE.MGSW_ZFMK19047	G.mar.36_DE.MGSW_ZFMK2516209	50.714	7.1772	50.6245	7.1936	10.0125	0.0182648
	G.mar.24_DE.MGSW_ZFMK19048	G.mar.36_DE.MGSW_ZFMK2516209	50.6715	7.0469	50.6245	7.1936	11.5814	0.0152207
	G.mar.25_DE.MGSW_ZFMK19049	G.mar.36_DE.MGSW_ZFMK2516209	51.291	7.2522	50.6245	7.1936	74.1784	0.0167428
	G.mar.26_DE.MGSW_ZFMK19051	G.mar.36_DE.MGSW_ZFMK2516209	50.5511	7.1722	50.6245	7.1936	8.29515	0.0289193
	G.mar.27_DE.MGSW_ZFMK19054	G.mar.36_DE.MGSW_ZFMK2516209	50.4647	7.2225	50.6245	7.1936	17.8747	0.0289193
	G.mar.28_DE.MGSW_ZFMK19057	G.mar.36_DE.MGSW_ZFMK2516209	51.361	7.5499	50.6245	7.1936	85.5535	0.0167428
	G.mar.29_DE.MGSW_ZFMK19539	G.mar.36_DE.MGSW_ZFMK2516209	50.6319	6.4731	50.6245	7.1936	50.7961	0.0304414
	G.mar.30_DE.MGSW_ZFMK19550	G.mar.36_DE.MGSW_ZFMK2516209	50.7797	8.0085	50.6245	7.1936	59.8904	0.0167428
	G.mar.31_DE.MGSW_ZFMK19555	G.mar.36_DE.MGSW_ZFMK2516209	50.7797	8.0085	50.6245	7.1936	59.8904	0.0258752
	G.mar.32_DE.MGSW_ZFMK19558	G.mar.36_DE.MGSW_ZFMK2516209	50.7093	7.7132	50.6245	7.1936	37.7912	0.0182648
	G.mar.33_DE.MGSW_ZFMK19560	G.mar.36_DE.MGSW_ZFMK2516209	50.7093	7.7132	50.6245	7.1936	37.7912	0.0167428
	G.mar.34_DE.MGSW_ZFMK19561	G.mar.36_DE.MGSW_ZFMK2516209	50.7093	7.7132	50.6245	7.1936	37.7912	0.0167428
	G.mar.35_DE.MGSW_ZFMK2516208	G.mar.36_DE.MGSW_ZFMK2516209	50.6245	7.1936	50.6245	7.1936	0	0
	G.mar.01_DE.MGSO_GBOL33714	G.mar.37_DE.MGSW_ZFMK2557907	51.7429	10.7672	51.1821	10.2208	72.9016	0.00152207
	G.mar.02_DE.MGSO_ZFMK100409275	G.mar.37_DE.MGSW_ZFMK2557907	51.7435	10.7673	51.1821	10.2208	72.9621	0.00913242
	G.mar.03_DE.MGSO_ZFMK1634	G.mar.37_DE.MGSW_ZFMK2557907	51.841	10.326	51.1821	10.2208	73.5809	0.00913242
	G.mar.04_DE.MGSO_ZFMK1909	G.mar.37_DE.MGSW_ZFMK2557907	50.8953	11.7527	51.1821	10.2208	111.683	0
	G.mar.05_DE.MGSO_ZFMK19531	G.mar.37_DE.MGSW_ZFMK2557907	50.8953	11.7527	51.1821	10.2208	111.683	0
	G.mar.06_DE.MGSO_ZFMK2503693	G.mar.37_DE.MGSW_ZFMK2557907	50.9194	11.5479	51.1821	10.2208	97.1929	0
	G.mar.07_DE.MGSO_ZFMK2503694	G.mar.37_DE.MGSW_ZFMK2557907	50.9194	11.5479	51.1821	10.2208	97.1929	0
	G.mar.08_DE.MGSO_ZFMK2542470	G.mar.37_DE.MGSW_ZFMK2557907	50.892	11.8209	51.1821	10.2208	116.363	0
	G.mar.09_DE.MGSO_ZFMK2542471	G.mar.37_DE.MGSW_ZFMK2557907	50.892	11.8209	51.1821	10.2208	116.363	0.00152207
	G.mar.10_DE.MGSO_ZFMK2542541	G.mar.37_DE.MGSW_ZFMK2557907	51.133	11.7487	51.1821	10.2208	106.626	0
	G.mar.11_DE.MGSO_ZFMK2542542	G.mar.37_DE.MGSW_ZFMK2557907	51.133	11.7487	51.1821	10.2208	106.626	0
	G.mar.12_DE.MGSW_ZFMK18967	G.mar.37_DE.MGSW_ZFMK2557907	50.6627	7.1026	51.1821	10.2208	225.908	0.00913242
	G.mar.13_DE.MGSW_ZFMK18987	G.mar.37_DE.MGSW_ZFMK2557907	50.6659	7.2156	51.1821	10.2208	218.165	0.00913242
	G.mar.14_DE.MGSW_ZFMK18988	G.mar.37_DE.MGSW_ZFMK2557907	50.6867	7.2997	51.1821	10.2208	211.832	0.0106545
	G.mar.15_DE.MGSW_ZFMK18991	G.mar.37_DE.MGSW_ZFMK2557907	50.7667	7.3667	51.1821	10.2208	204.958	0.0106545
	G.mar.16_DE.MGSW_ZFMK19003	G.mar.37_DE.MGSW_ZFMK2557907	51.361	7.5499	51.1821	10.2208	186.74	0.0106545
	G.mar.17_DE.MGSW_ZFMK19005	G.mar.37_DE.MGSW_ZFMK2557907	51.361	7.5499	51.1821	10.2208	186.74	0.00761035
	G.mar.18_DE.MGSW_ZFMK19029	G.mar.37_DE.MGSW_ZFMK2557907	50.56	6.8078	51.1821	10.2208	249.102	0.0304414
	G.mar.19_DE.MGSW_ZFMK19031	G.mar.37_DE.MGSW_ZFMK2557907	51.2299	7.054	51.1821	10.2208	220.527	0.0121766
	G.mar.20_DE.MGSW_ZFMK19044	G.mar.37_DE.MGSW_ZFMK2557907	50.8026	7.2418	51.1821	10.2208	212.575	0.0106545
	G.mar.21_DE.MGSW_ZFMK19045	G.mar.37_DE.MGSW_ZFMK2557907	51.3589	7.1697	51.1821	10.2208	213.019	0.00913242
	G.mar.22_DE.MGSW_ZFMK19046	G.mar.37_DE.MGSW_ZFMK2557907	51.2299	7.054	51.1821	10.2208	220.527	0.00913242
	G.mar.23_DE.MGSW_ZFMK19047	G.mar.37_DE.MGSW_ZFMK2557907	50.714	7.1772	51.1821	10.2208	219.327	0.0106545
	G.mar.24_DE.MGSW_ZFMK19048	G.mar.37_DE.MGSW_ZFMK2557907	50.6715	7.0469	51.1821	10.2208	229.417	0.0106545
	G.mar.25_DE.MGSW_ZFMK19049	G.mar.37_DE.MGSW_ZFMK2557907	51.291	7.2522	51.1821	10.2208	206.884	0.00913242
	G.mar.26_DE.MGSW_ZFMK19051	G.mar.37_DE.MGSW_ZFMK2557907	50.5511	7.1722	51.1821	10.2208	224.995	0.0304414
	G.mar.27_DE.MGSW_ZFMK19054	G.mar.37_DE.MGSW_ZFMK2557907	50.4647	7.2225	51.1821	10.2208	225.049	0.0304414
	G.mar.28_DE.MGSW_ZFMK19057	G.mar.37_DE.MGSW_ZFMK2557907	51.361	7.5499	51.1821	10.2208	186.74	0.00913242
	G.mar.29_DE.MGSW_ZFMK19539	G.mar.37_DE.MGSW_ZFMK2557907	50.6319	6.4731	51.1821	10.2208	269.605	0.0319635
	G.mar.30_DE.MGSW_ZFMK19550	G.mar.37_DE.MGSW_ZFMK2557907	50.7797	8.0085	51.1821	10.2208	161.1	0.00913242
	G.mar.31_DE.MGSW_ZFMK19555	G.mar.37_DE.MGSW_ZFMK2557907	50.7797	8.0085	51.1821	10.2208	161.1	0.0182648
	G.mar.32_DE.MGSW_ZFMK19558	G.mar.37_DE.MGSW_ZFMK2557907	50.7093	7.7132	51.1821	10.2208	183.252	0.0106545
	G.mar.33_DE.MGSW_ZFMK19560	G.mar.37_DE.MGSW_ZFMK2557907	50.7093	7.7132	51.1821	10.2208	183.252	0.00913242
	G.mar.34_DE.MGSW_ZFMK19561	G.mar.37_DE.MGSW_ZFMK2557907	50.7093	7.7132	51.1821	10.2208	183.252	0.00913242
	G.mar.35_DE.MGSW_ZFMK2516208	G.mar.37_DE.MGSW_ZFMK2557907	50.6245	7.1936	51.1821	10.2208	220.988	0.0136986
	G.mar.36_DE.MGSW_ZFMK2516209	G.mar.37_DE.MGSW_ZFMK2557907	50.6245	7.1936	51.1821	10.2208	220.988	0.0136986
	G.mar.01_DE.MGSO_GBOL33714	G.mar.38_DE.MGSW_ZFMK2557908	51.7429	10.7672	51.1821	10.2208	72.9016	0.00152207
	G.mar.02_DE.MGSO_ZFMK100409275	G.mar.38_DE.MGSW_ZFMK2557908	51.7435	10.7673	51.1821	10.2208	72.9621	0.00913242
	G.mar.03_DE.MGSO_ZFMK1634	G.mar.38_DE.MGSW_ZFMK2557908	51.841	10.326	51.1821	10.2208	73.5809	0.00913242
	G.mar.04_DE.MGSO_ZFMK1909	G.mar.38_DE.MGSW_ZFMK2557908	50.8953	11.7527	51.1821	10.2208	111.683	0
	G.mar.05_DE.MGSO_ZFMK19531	G.mar.38_DE.MGSW_ZFMK2557908	50.8953	11.7527	51.1821	10.2208	111.683	0
	G.mar.06_DE.MGSO_ZFMK2503693	G.mar.38_DE.MGSW_ZFMK2557908	50.9194	11.5479	51.1821	10.2208	97.1929	0
	G.mar.07_DE.MGSO_ZFMK2503694	G.mar.38_DE.MGSW_ZFMK2557908	50.9194	11.5479	51.1821	10.2208	97.1929	0
	G.mar.08_DE.MGSO_ZFMK2542470	G.mar.38_DE.MGSW_ZFMK2557908	50.892	11.8209	51.1821	10.2208	116.363	0
	G.mar.09_DE.MGSO_ZFMK2542471	G.mar.38_DE.MGSW_ZFMK2557908	50.892	11.8209	51.1821	10.2208	116.363	0.00152207
	G.mar.10_DE.MGSO_ZFMK2542541	G.mar.38_DE.MGSW_ZFMK2557908	51.133	11.7487	51.1821	10.2208	106.626	0
	G.mar.11_DE.MGSO_ZFMK2542542	G.mar.38_DE.MGSW_ZFMK2557908	51.133	11.7487	51.1821	10.2208	106.626	0
	G.mar.12_DE.MGSW_ZFMK18967	G.mar.38_DE.MGSW_ZFMK2557908	50.6627	7.1026	51.1821	10.2208	225.908	0.00913242
	G.mar.13_DE.MGSW_ZFMK18987	G.mar.38_DE.MGSW_ZFMK2557908	50.6659	7.2156	51.1821	10.2208	218.165	0.00913242
	G.mar.14_DE.MGSW_ZFMK18988	G.mar.38_DE.MGSW_ZFMK2557908	50.6867	7.2997	51.1821	10.2208	211.832	0.0106545
	G.mar.15_DE.MGSW_ZFMK18991	G.mar.38_DE.MGSW_ZFMK2557908	50.7667	7.3667	51.1821	10.2208	204.958	0.0106545
	G.mar.16_DE.MGSW_ZFMK19003	G.mar.38_DE.MGSW_ZFMK2557908	51.361	7.5499	51.1821	10.2208	186.74	0.0106545
	G.mar.17_DE.MGSW_ZFMK19005	G.mar.38_DE.MGSW_ZFMK2557908	51.361	7.5499	51.1821	10.2208	186.74	0.00761035
	G.mar.18_DE.MGSW_ZFMK19029	G.mar.38_DE.MGSW_ZFMK2557908	50.56	6.8078	51.1821	10.2208	249.102	0.0304414
	G.mar.19_DE.MGSW_ZFMK19031	G.mar.38_DE.MGSW_ZFMK2557908	51.2299	7.054	51.1821	10.2208	220.527	0.0121766
	G.mar.20_DE.MGSW_ZFMK19044	G.mar.38_DE.MGSW_ZFMK2557908	50.8026	7.2418	51.1821	10.2208	212.575	0.0106545
	G.mar.21_DE.MGSW_ZFMK19045	G.mar.38_DE.MGSW_ZFMK2557908	51.3589	7.1697	51.1821	10.2208	213.019	0.00913242
	G.mar.22_DE.MGSW_ZFMK19046	G.mar.38_DE.MGSW_ZFMK2557908	51.2299	7.054	51.1821	10.2208	220.527	0.00913242
	G.mar.23_DE.MGSW_ZFMK19047	G.mar.38_DE.MGSW_ZFMK2557908	50.714	7.1772	51.1821	10.2208	219.327	0.0106545
	G.mar.24_DE.MGSW_ZFMK19048	G.mar.38_DE.MGSW_ZFMK2557908	50.6715	7.0469	51.1821	10.2208	229.417	0.0106545
	G.mar.25_DE.MGSW_ZFMK19049	G.mar.38_DE.MGSW_ZFMK2557908	51.291	7.2522	51.1821	10.2208	206.884	0.00913242
	G.mar.26_DE.MGSW_ZFMK19051	G.mar.38_DE.MGSW_ZFMK2557908	50.5511	7.1722	51.1821	10.2208	224.995	0.0304414
	G.mar.27_DE.MGSW_ZFMK19054	G.mar.38_DE.MGSW_ZFMK2557908	50.4647	7.2225	51.1821	10.2208	225.049	0.0304414
	G.mar.28_DE.MGSW_ZFMK19057	G.mar.38_DE.MGSW_ZFMK2557908	51.361	7.5499	51.1821	10.2208	186.74	0.00913242
	G.mar.29_DE.MGSW_ZFMK19539	G.mar.38_DE.MGSW_ZFMK2557908	50.6319	6.4731	51.1821	10.2208	269.605	0.0319635
	G.mar.30_DE.MGSW_ZFMK19550	G.mar.38_DE.MGSW_ZFMK2557908	50.7797	8.0085	51.1821	10.2208	161.1	0.00913242
	G.mar.31_DE.MGSW_ZFMK19555	G.mar.38_DE.MGSW_ZFMK2557908	50.7797	8.0085	51.1821	10.2208	161.1	0.0182648
	G.mar.32_DE.MGSW_ZFMK19558	G.mar.38_DE.MGSW_ZFMK2557908	50.7093	7.7132	51.1821	10.2208	183.252	0.0106545
	G.mar.33_DE.MGSW_ZFMK19560	G.mar.38_DE.MGSW_ZFMK2557908	50.7093	7.7132	51.1821	10.2208	183.252	0.00913242
	G.mar.34_DE.MGSW_ZFMK19561	G.mar.38_DE.MGSW_ZFMK2557908	50.7093	7.7132	51.1821	10.2208	183.252	0.00913242
	G.mar.35_DE.MGSW_ZFMK2516208	G.mar.38_DE.MGSW_ZFMK2557908	50.6245	7.1936	51.1821	10.2208	220.988	0.0136986
	G.mar.36_DE.MGSW_ZFMK2516209	G.mar.38_DE.MGSW_ZFMK2557908	50.6245	7.1936	51.1821	10.2208	220.988	0.0136986
	G.mar.37_DE.MGSW_ZFMK2557907	G.mar.38_DE.MGSW_ZFMK2557908	51.1821	10.2208	51.1821	10.2208	0	0
	G.mar.01_DE.MGSO_GBOL33714	G.mar.39_DE.NDTO_ZFMK100409283	51.7429	10.7672	53.9192	10.0977	245.98	0.0106545
	G.mar.02_DE.MGSO_ZFMK100409275	G.mar.39_DE.NDTO_ZFMK100409283	51.7435	10.7673	53.9192	10.0977	245.916	0
	G.mar.03_DE.MGSO_ZFMK1634	G.mar.39_DE.NDTO_ZFMK100409283	51.841	10.326	53.9192	10.0977	231.447	0
	G.mar.04_DE.MGSO_ZFMK1909	G.mar.39_DE.NDTO_ZFMK100409283	50.8953	11.7527	53.9192	10.0977	354.241	0.00913242
	G.mar.05_DE.MGSO_ZFMK19531	G.mar.39_DE.NDTO_ZFMK100409283	50.8953	11.7527	53.9192	10.0977	354.241	0.00913242
	G.mar.06_DE.MGSO_ZFMK2503693	G.mar.39_DE.NDTO_ZFMK100409283	50.9194	11.5479	53.9192	10.0977	347.52	0.00913242
	G.mar.07_DE.MGSO_ZFMK2503694	G.mar.39_DE.NDTO_ZFMK100409283	50.9194	11.5479	53.9192	10.0977	347.52	0.00913242
	G.mar.08_DE.MGSO_ZFMK2542470	G.mar.39_DE.NDTO_ZFMK100409283	50.892	11.8209	53.9192	10.0977	356.077	0.00913242
	G.mar.09_DE.MGSO_ZFMK2542471	G.mar.39_DE.NDTO_ZFMK100409283	50.892	11.8209	53.9192	10.0977	356.077	0.0106545
	G.mar.10_DE.MGSO_ZFMK2542541	G.mar.39_DE.NDTO_ZFMK100409283	51.133	11.7487	53.9192	10.0977	329.099	0.00913242
	G.mar.11_DE.MGSO_ZFMK2542542	G.mar.39_DE.NDTO_ZFMK100409283	51.133	11.7487	53.9192	10.0977	329.099	0.00913242
	G.mar.12_DE.MGSW_ZFMK18967	G.mar.39_DE.NDTO_ZFMK100409283	50.6627	7.1026	53.9192	10.0977	415.123	0
	G.mar.13_DE.MGSW_ZFMK18987	G.mar.39_DE.NDTO_ZFMK100409283	50.6659	7.2156	53.9192	10.0977	411.102	0
	G.mar.14_DE.MGSW_ZFMK18988	G.mar.39_DE.NDTO_ZFMK100409283	50.6867	7.2997	53.9192	10.0977	406.349	0.00152207
	G.mar.15_DE.MGSW_ZFMK18991	G.mar.39_DE.NDTO_ZFMK100409283	50.7667	7.3667	53.9192	10.0977	396.289	0.00152207
	G.mar.16_DE.MGSW_ZFMK19003	G.mar.39_DE.NDTO_ZFMK100409283	51.361	7.5499	53.9192	10.0977	332.113	0.00152207
	G.mar.17_DE.MGSW_ZFMK19005	G.mar.39_DE.NDTO_ZFMK100409283	51.361	7.5499	53.9192	10.0977	332.113	0.00152207
	G.mar.18_DE.MGSW_ZFMK19029	G.mar.39_DE.NDTO_ZFMK100409283	50.56	6.8078	53.9192	10.0977	435.168	0.0304414
	G.mar.19_DE.MGSW_ZFMK19031	G.mar.39_DE.NDTO_ZFMK100409283	51.2299	7.054	53.9192	10.0977	362.641	0.0121766
	G.mar.20_DE.MGSW_ZFMK19044	G.mar.39_DE.NDTO_ZFMK100409283	50.8026	7.2418	53.9192	10.0977	396.796	0.00152207
	G.mar.21_DE.MGSW_ZFMK19045	G.mar.39_DE.NDTO_ZFMK100409283	51.3589	7.1697	53.9192	10.0977	346.249	0
	G.mar.22_DE.MGSW_ZFMK19046	G.mar.39_DE.NDTO_ZFMK100409283	51.2299	7.054	53.9192	10.0977	362.641	0
	G.mar.23_DE.MGSW_ZFMK19047	G.mar.39_DE.NDTO_ZFMK100409283	50.714	7.1772	53.9192	10.0977	407.621	0.00152207
	G.mar.24_DE.MGSW_ZFMK19048	G.mar.39_DE.NDTO_ZFMK100409283	50.6715	7.0469	53.9192	10.0977	416.13	0.00152207
	G.mar.25_DE.MGSW_ZFMK19049	G.mar.39_DE.NDTO_ZFMK100409283	51.291	7.2522	53.9192	10.0977	349.472	0
	G.mar.26_DE.MGSW_ZFMK19051	G.mar.39_DE.NDTO_ZFMK100409283	50.5511	7.1722	53.9192	10.0977	423.853	0.0304414
	G.mar.27_DE.MGSW_ZFMK19054	G.mar.39_DE.NDTO_ZFMK100409283	50.4647	7.2225	53.9192	10.0977	430.875	0.0304414
	G.mar.28_DE.MGSW_ZFMK19057	G.mar.39_DE.NDTO_ZFMK100409283	51.361	7.5499	53.9192	10.0977	332.113	0
	G.mar.29_DE.MGSW_ZFMK19539	G.mar.39_DE.NDTO_ZFMK100409283	50.6319	6.4731	53.9192	10.0977	440.533	0.0319635
	G.mar.30_DE.MGSW_ZFMK19550	G.mar.39_DE.NDTO_ZFMK100409283	50.7797	8.0085	53.9192	10.0977	376.557	0
	G.mar.31_DE.MGSW_ZFMK19555	G.mar.39_DE.NDTO_ZFMK100409283	50.7797	8.0085	53.9192	10.0977	376.557	0.0182648
	G.mar.32_DE.MGSW_ZFMK19558	G.mar.39_DE.NDTO_ZFMK100409283	50.7093	7.7132	53.9192	10.0977	391.704	0.00152207
	G.mar.33_DE.MGSW_ZFMK19560	G.mar.39_DE.NDTO_ZFMK100409283	50.7093	7.7132	53.9192	10.0977	391.704	0
	G.mar.34_DE.MGSW_ZFMK19561	G.mar.39_DE.NDTO_ZFMK100409283	50.7093	7.7132	53.9192	10.0977	391.704	0
	G.mar.35_DE.MGSW_ZFMK2516208	G.mar.39_DE.NDTO_ZFMK100409283	50.6245	7.1936	53.9192	10.0977	415.901	0.0167428
	G.mar.36_DE.MGSW_ZFMK2516209	G.mar.39_DE.NDTO_ZFMK100409283	50.6245	7.1936	53.9192	10.0977	415.901	0.0167428
	G.mar.37_DE.MGSW_ZFMK2557907	G.mar.39_DE.NDTO_ZFMK100409283	51.1821	10.2208	53.9192	10.0977	304.274	0.00913242
	G.mar.38_DE.MGSW_ZFMK2557908	G.mar.39_DE.NDTO_ZFMK100409283	51.1821	10.2208	53.9192	10.0977	304.274	0.00913242
	G.mar.01_DE.MGSO_GBOL33714	G.mar.40_DE.NDTO_ZFMK2538190	51.7429	10.7672	54.303	10.756	284.492	0.00458015
	G.mar.02_DE.MGSO_ZFMK100409275	G.mar.40_DE.NDTO_ZFMK2538190	51.7435	10.7673	54.303	10.756	284.426	0.00458015
	G.mar.03_DE.MGSO_ZFMK1634	G.mar.40_DE.NDTO_ZFMK2538190	51.841	10.326	54.303	10.756	275.091	0.00458015
	G.mar.04_DE.MGSO_ZFMK1909	G.mar.40_DE.NDTO_ZFMK2538190	50.8953	11.7527	54.303	10.756	384.6	0.00305344
	G.mar.05_DE.MGSO_ZFMK19531	G.mar.40_DE.NDTO_ZFMK2538190	50.8953	11.7527	54.303	10.756	384.6	0.00305344
	G.mar.06_DE.MGSO_ZFMK2503693	G.mar.40_DE.NDTO_ZFMK2538190	50.9194	11.5479	54.303	10.756	379.774	0.00305344
	G.mar.07_DE.MGSO_ZFMK2503694	G.mar.40_DE.NDTO_ZFMK2538190	50.9194	11.5479	54.303	10.756	379.774	0.00305344
	G.mar.08_DE.MGSO_ZFMK2542470	G.mar.40_DE.NDTO_ZFMK2538190	50.892	11.8209	54.303	10.756	385.791	0.00305344
	G.mar.09_DE.MGSO_ZFMK2542471	G.mar.40_DE.NDTO_ZFMK2538190	50.892	11.8209	54.303	10.756	385.791	0.00458015
	G.mar.10_DE.MGSO_ZFMK2542541	G.mar.40_DE.NDTO_ZFMK2538190	51.133	11.7487	54.303	10.756	358.538	0.00305344
	G.mar.11_DE.MGSO_ZFMK2542542	G.mar.40_DE.NDTO_ZFMK2538190	51.133	11.7487	54.303	10.756	358.538	0.00305344
	G.mar.12_DE.MGSW_ZFMK18967	G.mar.40_DE.NDTO_ZFMK2538190	50.6627	7.1026	54.303	10.756	473.957	0.00458015
	G.mar.13_DE.MGSW_ZFMK18987	G.mar.40_DE.NDTO_ZFMK2538190	50.6659	7.2156	54.303	10.756	469.712	0.00458015
	G.mar.14_DE.MGSW_ZFMK18988	G.mar.40_DE.NDTO_ZFMK2538190	50.6867	7.2997	54.303	10.756	464.816	0.00610687
	G.mar.15_DE.MGSW_ZFMK18991	G.mar.40_DE.NDTO_ZFMK2538190	50.7667	7.3667	54.303	10.756	454.755	0.00610687
	G.mar.16_DE.MGSW_ZFMK19003	G.mar.40_DE.NDTO_ZFMK2538190	51.361	7.5499	54.303	10.756	391.336	0.00610687
	G.mar.17_DE.MGSW_ZFMK19005	G.mar.40_DE.NDTO_ZFMK2538190	51.361	7.5499	54.303	10.756	391.336	0.00305344
	G.mar.18_DE.MGSW_ZFMK19029	G.mar.40_DE.NDTO_ZFMK2538190	50.56	6.8078	54.303	10.756	494.363	0.0274809
	G.mar.19_DE.MGSW_ZFMK19031	G.mar.40_DE.NDTO_ZFMK2538190	51.2299	7.054	54.303	10.756	422.462	0.00916031
	G.mar.20_DE.MGSW_ZFMK19044	G.mar.40_DE.NDTO_ZFMK2538190	50.8026	7.2418	54.303	10.756	455.598	0.00610687
	G.mar.21_DE.MGSW_ZFMK19045	G.mar.40_DE.NDTO_ZFMK2538190	51.3589	7.1697	54.303	10.756	406.102	0.00458015
	G.mar.22_DE.MGSW_ZFMK19046	G.mar.40_DE.NDTO_ZFMK2538190	51.2299	7.054	54.303	10.756	422.462	0.00458015
	G.mar.23_DE.MGSW_ZFMK19047	G.mar.40_DE.NDTO_ZFMK2538190	50.714	7.1772	54.303	10.756	466.396	0.00610687
	G.mar.24_DE.MGSW_ZFMK19048	G.mar.40_DE.NDTO_ZFMK2538190	50.6715	7.0469	54.303	10.756	475.085	0.00458015
	G.mar.25_DE.MGSW_ZFMK19049	G.mar.40_DE.NDTO_ZFMK2538190	51.291	7.2522	54.303	10.756	409.101	0.00458015
	G.mar.26_DE.MGSW_ZFMK19051	G.mar.40_DE.NDTO_ZFMK2538190	50.5511	7.1722	54.303	10.756	482.351	0.0274809
	G.mar.27_DE.MGSW_ZFMK19054	G.mar.40_DE.NDTO_ZFMK2538190	50.4647	7.2225	54.303	10.756	489.11	0.0274809
	G.mar.28_DE.MGSW_ZFMK19057	G.mar.40_DE.NDTO_ZFMK2538190	51.361	7.5499	54.303	10.756	391.336	0.00458015
	G.mar.29_DE.MGSW_ZFMK19539	G.mar.40_DE.NDTO_ZFMK2538190	50.6319	6.4731	54.303	10.756	500.294	0.0290076
	G.mar.30_DE.MGSW_ZFMK19550	G.mar.40_DE.NDTO_ZFMK2538190	50.7797	8.0085	54.303	10.756	433.248	0.00458015
	G.mar.31_DE.MGSW_ZFMK19555	G.mar.40_DE.NDTO_ZFMK2538190	50.7797	8.0085	54.303	10.756	433.248	0.0167939
	G.mar.32_DE.MGSW_ZFMK19558	G.mar.40_DE.NDTO_ZFMK2538190	50.7093	7.7132	54.303	10.756	449.164	0.00610687
	G.mar.33_DE.MGSW_ZFMK19560	G.mar.40_DE.NDTO_ZFMK2538190	50.7093	7.7132	54.303	10.756	449.164	0.00458015
	G.mar.34_DE.MGSW_ZFMK19561	G.mar.40_DE.NDTO_ZFMK2538190	50.7093	7.7132	54.303	10.756	449.164	0.00458015
	G.mar.35_DE.MGSW_ZFMK2516208	G.mar.40_DE.NDTO_ZFMK2538190	50.6245	7.1936	54.303	10.756	474.484	0.010687
	G.mar.36_DE.MGSW_ZFMK2516209	G.mar.40_DE.NDTO_ZFMK2538190	50.6245	7.1936	54.303	10.756	474.484	0.010687
	G.mar.37_DE.MGSW_ZFMK2557907	G.mar.40_DE.NDTO_ZFMK2538190	51.1821	10.2208	54.303	10.756	348.672	0.00305344
	G.mar.38_DE.MGSW_ZFMK2557908	G.mar.40_DE.NDTO_ZFMK2538190	51.1821	10.2208	54.303	10.756	348.672	0.00305344
	G.mar.39_DE.NDTO_ZFMK100409283	G.mar.40_DE.NDTO_ZFMK2538190	53.9192	10.0977	54.303	10.756	60.4811	0.00458015
	G.mar.01_DE.MGSO_GBOL33714	G.mar.41_DE.NDTO_ZFMK2538253	51.7429	10.7672	53.124	13.884	261.009	0.0167683
	G.mar.02_DE.MGSO_ZFMK100409275	G.mar.41_DE.NDTO_ZFMK2538253	51.7435	10.7673	53.124	13.884	260.963	0.00914634
	G.mar.03_DE.MGSO_ZFMK1634	G.mar.41_DE.NDTO_ZFMK2538253	51.841	10.326	53.124	13.884	279.786	0.00914634
	G.mar.04_DE.MGSO_ZFMK1909	G.mar.41_DE.NDTO_ZFMK2538253	50.8953	11.7527	53.124	13.884	287.355	0.0152439
	G.mar.05_DE.MGSO_ZFMK19531	G.mar.41_DE.NDTO_ZFMK2538253	50.8953	11.7527	53.124	13.884	287.355	0.0152439
	G.mar.06_DE.MGSO_ZFMK2503693	G.mar.41_DE.NDTO_ZFMK2538253	50.9194	11.5479	53.124	13.884	292.433	0.0152439
	G.mar.07_DE.MGSO_ZFMK2503694	G.mar.41_DE.NDTO_ZFMK2538253	50.9194	11.5479	53.124	13.884	292.433	0.0152439
	G.mar.08_DE.MGSO_ZFMK2542470	G.mar.41_DE.NDTO_ZFMK2538253	50.892	11.8209	53.124	13.884	285.34	0.0152439
	G.mar.09_DE.MGSO_ZFMK2542471	G.mar.41_DE.NDTO_ZFMK2538253	50.892	11.8209	53.124	13.884	285.34	0.0167683
	G.mar.10_DE.MGSO_ZFMK2542541	G.mar.41_DE.NDTO_ZFMK2538253	51.133	11.7487	53.124	13.884	264.871	0.0152439
	G.mar.11_DE.MGSO_ZFMK2542542	G.mar.41_DE.NDTO_ZFMK2538253	51.133	11.7487	53.124	13.884	264.871	0.0152439
	G.mar.12_DE.MGSW_ZFMK18967	G.mar.41_DE.NDTO_ZFMK2538253	50.6627	7.1026	53.124	13.884	539.199	0.00914634
	G.mar.13_DE.MGSW_ZFMK18987	G.mar.41_DE.NDTO_ZFMK2538253	50.6659	7.2156	53.124	13.884	532.349	0.00914634
	G.mar.14_DE.MGSW_ZFMK18988	G.mar.41_DE.NDTO_ZFMK2538253	50.6867	7.2997	53.124	13.884	526.134	0.0106707
	G.mar.15_DE.MGSW_ZFMK18991	G.mar.41_DE.NDTO_ZFMK2538253	50.7667	7.3667	53.124	13.884	517.32	0.0106707
	G.mar.16_DE.MGSW_ZFMK19003	G.mar.41_DE.NDTO_ZFMK2538253	51.361	7.5499	53.124	13.884	473.219	0.0106707
	G.mar.17_DE.MGSW_ZFMK19005	G.mar.41_DE.NDTO_ZFMK2538253	51.361	7.5499	53.124	13.884	473.219	0.0106707
	G.mar.18_DE.MGSW_ZFMK19029	G.mar.41_DE.NDTO_ZFMK2538253	50.56	6.8078	53.124	13.884	562.845	0.0213415
	G.mar.19_DE.MGSW_ZFMK19031	G.mar.41_DE.NDTO_ZFMK2538253	51.2299	7.054	53.124	13.884	510.537	0.00914634
	G.mar.20_DE.MGSW_ZFMK19044	G.mar.41_DE.NDTO_ZFMK2538253	50.8026	7.2418	53.124	13.884	522.571	0.0106707
	G.mar.21_DE.MGSW_ZFMK19045	G.mar.41_DE.NDTO_ZFMK2538253	51.3589	7.1697	53.124	13.884	496.955	0.00914634
	G.mar.22_DE.MGSW_ZFMK19046	G.mar.41_DE.NDTO_ZFMK2538253	51.2299	7.054	53.124	13.884	510.537	0.00914634
	G.mar.23_DE.MGSW_ZFMK19047	G.mar.41_DE.NDTO_ZFMK2538253	50.714	7.1772	53.124	13.884	531.69	0.0106707
	G.mar.24_DE.MGSW_ZFMK19048	G.mar.41_DE.NDTO_ZFMK2538253	50.6715	7.0469	53.124	13.884	541.958	0.00914634
	G.mar.25_DE.MGSW_ZFMK19049	G.mar.41_DE.NDTO_ZFMK2538253	51.291	7.2522	53.124	13.884	495.174	0.00914634
	G.mar.26_DE.MGSW_ZFMK19051	G.mar.41_DE.NDTO_ZFMK2538253	50.5511	7.1722	53.124	13.884	542.01	0.0213415
	G.mar.27_DE.MGSW_ZFMK19054	G.mar.41_DE.NDTO_ZFMK2538253	50.4647	7.2225	53.124	13.884	544.593	0.0213415
	G.mar.28_DE.MGSW_ZFMK19057	G.mar.41_DE.NDTO_ZFMK2538253	51.361	7.5499	53.124	13.884	473.219	0.00914634
	G.mar.29_DE.MGSW_ZFMK19539	G.mar.41_DE.NDTO_ZFMK2538253	50.6319	6.4731	53.124	13.884	578.535	0.0228659
	G.mar.30_DE.MGSW_ZFMK19550	G.mar.41_DE.NDTO_ZFMK2538253	50.7797	8.0085	53.124	13.884	479.141	0.00914634
	G.mar.31_DE.MGSW_ZFMK19555	G.mar.41_DE.NDTO_ZFMK2538253	50.7797	8.0085	53.124	13.884	479.141	0.0106707
	G.mar.32_DE.MGSW_ZFMK19558	G.mar.41_DE.NDTO_ZFMK2538253	50.7093	7.7132	53.124	13.884	500.638	0.0106707
	G.mar.33_DE.MGSW_ZFMK19560	G.mar.41_DE.NDTO_ZFMK2538253	50.7093	7.7132	53.124	13.884	500.638	0.00914634
	G.mar.34_DE.MGSW_ZFMK19561	G.mar.41_DE.NDTO_ZFMK2538253	50.7093	7.7132	53.124	13.884	500.638	0.00914634
	G.mar.35_DE.MGSW_ZFMK2516208	G.mar.41_DE.NDTO_ZFMK2538253	50.6245	7.1936	53.124	13.884	536.187	0.0213415
	G.mar.36_DE.MGSW_ZFMK2516209	G.mar.41_DE.NDTO_ZFMK2538253	50.6245	7.1936	53.124	13.884	536.187	0.0213415
	G.mar.37_DE.MGSW_ZFMK2557907	G.mar.41_DE.NDTO_ZFMK2538253	51.1821	10.2208	53.124	13.884	329.998	0.0152439
	G.mar.38_DE.MGSW_ZFMK2557908	G.mar.41_DE.NDTO_ZFMK2538253	51.1821	10.2208	53.124	13.884	329.998	0.0152439
	G.mar.39_DE.NDTO_ZFMK100409283	G.mar.41_DE.NDTO_ZFMK2538253	53.9192	10.0977	53.124	13.884	265.255	0.00914634
	G.mar.40_DE.NDTO_ZFMK2538190	G.mar.41_DE.NDTO_ZFMK2538253	54.303	10.756	53.124	13.884	243.861	0.0122324
	G.mar.01_DE.MGSO_GBOL33714	G.mar.42_DE.NDTO_ZFMK2553394	51.7429	10.7672	53.6525	11.4369	216.942	0.00152207
	G.mar.02_DE.MGSO_ZFMK100409275	G.mar.42_DE.NDTO_ZFMK2553394	51.7435	10.7673	53.6525	11.4369	216.875	0.00913242
	G.mar.03_DE.MGSO_ZFMK1634	G.mar.42_DE.NDTO_ZFMK2553394	51.841	10.326	53.6525	11.4369	214.719	0.00913242
	G.mar.04_DE.MGSO_ZFMK1909	G.mar.42_DE.NDTO_ZFMK2553394	50.8953	11.7527	53.6525	11.4369	307.145	0
	G.mar.05_DE.MGSO_ZFMK19531	G.mar.42_DE.NDTO_ZFMK2553394	50.8953	11.7527	53.6525	11.4369	307.145	0
	G.mar.06_DE.MGSO_ZFMK2503693	G.mar.42_DE.NDTO_ZFMK2553394	50.9194	11.5479	53.6525	11.4369	303.81	0
	G.mar.07_DE.MGSO_ZFMK2503694	G.mar.42_DE.NDTO_ZFMK2553394	50.9194	11.5479	53.6525	11.4369	303.81	0
	G.mar.08_DE.MGSO_ZFMK2542470	G.mar.42_DE.NDTO_ZFMK2553394	50.892	11.8209	53.6525	11.4369	307.869	0
	G.mar.09_DE.MGSO_ZFMK2542471	G.mar.42_DE.NDTO_ZFMK2553394	50.892	11.8209	53.6525	11.4369	307.869	0.00152207
	G.mar.10_DE.MGSO_ZFMK2542541	G.mar.42_DE.NDTO_ZFMK2553394	51.133	11.7487	53.6525	11.4369	280.776	0
	G.mar.11_DE.MGSO_ZFMK2542542	G.mar.42_DE.NDTO_ZFMK2553394	51.133	11.7487	53.6525	11.4369	280.776	0
	G.mar.12_DE.MGSW_ZFMK18967	G.mar.42_DE.NDTO_ZFMK2553394	50.6627	7.1026	53.6525	11.4369	444.47	0.00913242
	G.mar.13_DE.MGSW_ZFMK18987	G.mar.42_DE.NDTO_ZFMK2553394	50.6659	7.2156	53.6525	11.4369	439.121	0.00913242
	G.mar.14_DE.MGSW_ZFMK18988	G.mar.42_DE.NDTO_ZFMK2553394	50.6867	7.2997	53.6525	11.4369	433.592	0.0106545
	G.mar.15_DE.MGSW_ZFMK18991	G.mar.42_DE.NDTO_ZFMK2553394	50.7667	7.3667	53.6525	11.4369	423.72	0.0106545
	G.mar.16_DE.MGSW_ZFMK19003	G.mar.42_DE.NDTO_ZFMK2553394	51.361	7.5499	53.6525	11.4369	365.913	0.0106545
	G.mar.17_DE.MGSW_ZFMK19005	G.mar.42_DE.NDTO_ZFMK2553394	51.361	7.5499	53.6525	11.4369	365.913	0.00761035
	G.mar.18_DE.MGSW_ZFMK19029	G.mar.42_DE.NDTO_ZFMK2553394	50.56	6.8078	53.6525	11.4369	466.631	0.0304414
	G.mar.19_DE.MGSW_ZFMK19031	G.mar.42_DE.NDTO_ZFMK2553394	51.2299	7.054	53.6525	11.4369	400.642	0.0121766
	G.mar.20_DE.MGSW_ZFMK19044	G.mar.42_DE.NDTO_ZFMK2553394	50.8026	7.2418	53.6525	11.4369	426.275	0.0106545
	G.mar.21_DE.MGSW_ZFMK19045	G.mar.42_DE.NDTO_ZFMK2553394	51.3589	7.1697	53.6525	11.4369	384.94	0.00913242
	G.mar.22_DE.MGSW_ZFMK19046	G.mar.42_DE.NDTO_ZFMK2553394	51.2299	7.054	53.6525	11.4369	400.642	0.00913242
	G.mar.23_DE.MGSW_ZFMK19047	G.mar.42_DE.NDTO_ZFMK2553394	50.714	7.1772	53.6525	11.4369	436.727	0.0106545
	G.mar.24_DE.MGSW_ZFMK19048	G.mar.42_DE.NDTO_ZFMK2553394	50.6715	7.0469	53.6525	11.4369	446.253	0.0106545
	G.mar.25_DE.MGSW_ZFMK19049	G.mar.42_DE.NDTO_ZFMK2553394	51.291	7.2522	53.6525	11.4369	386.026	0.00913242
	G.mar.26_DE.MGSW_ZFMK19051	G.mar.42_DE.NDTO_ZFMK2553394	50.5511	7.1722	53.6525	11.4369	450.971	0.0304414
	G.mar.27_DE.MGSW_ZFMK19054	G.mar.42_DE.NDTO_ZFMK2553394	50.4647	7.2225	53.6525	11.4369	456.35	0.0304414
	G.mar.28_DE.MGSW_ZFMK19057	G.mar.42_DE.NDTO_ZFMK2553394	51.361	7.5499	53.6525	11.4369	365.913	0.00913242
	G.mar.29_DE.MGSW_ZFMK19539	G.mar.42_DE.NDTO_ZFMK2553394	50.6319	6.4731	53.6525	11.4369	476.512	0.0319635
	G.mar.30_DE.MGSW_ZFMK19550	G.mar.42_DE.NDTO_ZFMK2553394	50.7797	8.0085	53.6525	11.4369	395.375	0.00913242
	G.mar.31_DE.MGSW_ZFMK19555	G.mar.42_DE.NDTO_ZFMK2553394	50.7797	8.0085	53.6525	11.4369	395.375	0.0182648
	G.mar.32_DE.MGSW_ZFMK19558	G.mar.42_DE.NDTO_ZFMK2553394	50.7093	7.7132	53.6525	11.4369	413.823	0.0106545
	G.mar.33_DE.MGSW_ZFMK19560	G.mar.42_DE.NDTO_ZFMK2553394	50.7093	7.7132	53.6525	11.4369	413.823	0.00913242
	G.mar.34_DE.MGSW_ZFMK19561	G.mar.42_DE.NDTO_ZFMK2553394	50.7093	7.7132	53.6525	11.4369	413.823	0.00913242
	G.mar.35_DE.MGSW_ZFMK2516208	G.mar.42_DE.NDTO_ZFMK2553394	50.6245	7.1936	53.6525	11.4369	443.667	0.0136986
	G.mar.36_DE.MGSW_ZFMK2516209	G.mar.42_DE.NDTO_ZFMK2553394	50.6245	7.1936	53.6525	11.4369	443.667	0.0136986
	G.mar.37_DE.MGSW_ZFMK2557907	G.mar.42_DE.NDTO_ZFMK2553394	51.1821	10.2208	53.6525	11.4369	286.618	0
	G.mar.38_DE.MGSW_ZFMK2557908	G.mar.42_DE.NDTO_ZFMK2553394	51.1821	10.2208	53.6525	11.4369	286.618	0
	G.mar.39_DE.NDTO_ZFMK100409283	G.mar.42_DE.NDTO_ZFMK2553394	53.9192	10.0977	53.6525	11.4369	92.7818	0.00913242
	G.mar.40_DE.NDTO_ZFMK2538190	G.mar.42_DE.NDTO_ZFMK2553394	54.303	10.756	53.6525	11.4369	84.8844	0.00305344
	G.mar.41_DE.NDTO_ZFMK2538253	G.mar.42_DE.NDTO_ZFMK2553394	53.124	13.884	53.6525	11.4369	172.474	0.0152439
	G.mar.01_DE.MGSO_GBOL33714	G.mar.43_DE.NDTO_ZFMK2553395	51.7429	10.7672	53.6525	11.4369	216.942	0.00152207
	G.mar.02_DE.MGSO_ZFMK100409275	G.mar.43_DE.NDTO_ZFMK2553395	51.7435	10.7673	53.6525	11.4369	216.875	0.00913242
	G.mar.03_DE.MGSO_ZFMK1634	G.mar.43_DE.NDTO_ZFMK2553395	51.841	10.326	53.6525	11.4369	214.719	0.00913242
	G.mar.04_DE.MGSO_ZFMK1909	G.mar.43_DE.NDTO_ZFMK2553395	50.8953	11.7527	53.6525	11.4369	307.145	0
	G.mar.05_DE.MGSO_ZFMK19531	G.mar.43_DE.NDTO_ZFMK2553395	50.8953	11.7527	53.6525	11.4369	307.145	0
	G.mar.06_DE.MGSO_ZFMK2503693	G.mar.43_DE.NDTO_ZFMK2553395	50.9194	11.5479	53.6525	11.4369	303.81	0
	G.mar.07_DE.MGSO_ZFMK2503694	G.mar.43_DE.NDTO_ZFMK2553395	50.9194	11.5479	53.6525	11.4369	303.81	0
	G.mar.08_DE.MGSO_ZFMK2542470	G.mar.43_DE.NDTO_ZFMK2553395	50.892	11.8209	53.6525	11.4369	307.869	0
	G.mar.09_DE.MGSO_ZFMK2542471	G.mar.43_DE.NDTO_ZFMK2553395	50.892	11.8209	53.6525	11.4369	307.869	0.00152207
	G.mar.10_DE.MGSO_ZFMK2542541	G.mar.43_DE.NDTO_ZFMK2553395	51.133	11.7487	53.6525	11.4369	280.776	0
	G.mar.11_DE.MGSO_ZFMK2542542	G.mar.43_DE.NDTO_ZFMK2553395	51.133	11.7487	53.6525	11.4369	280.776	0
	G.mar.12_DE.MGSW_ZFMK18967	G.mar.43_DE.NDTO_ZFMK2553395	50.6627	7.1026	53.6525	11.4369	444.47	0.00913242
	G.mar.13_DE.MGSW_ZFMK18987	G.mar.43_DE.NDTO_ZFMK2553395	50.6659	7.2156	53.6525	11.4369	439.121	0.00913242
	G.mar.14_DE.MGSW_ZFMK18988	G.mar.43_DE.NDTO_ZFMK2553395	50.6867	7.2997	53.6525	11.4369	433.592	0.0106545
	G.mar.15_DE.MGSW_ZFMK18991	G.mar.43_DE.NDTO_ZFMK2553395	50.7667	7.3667	53.6525	11.4369	423.72	0.0106545
	G.mar.16_DE.MGSW_ZFMK19003	G.mar.43_DE.NDTO_ZFMK2553395	51.361	7.5499	53.6525	11.4369	365.913	0.0106545
	G.mar.17_DE.MGSW_ZFMK19005	G.mar.43_DE.NDTO_ZFMK2553395	51.361	7.5499	53.6525	11.4369	365.913	0.00761035
	G.mar.18_DE.MGSW_ZFMK19029	G.mar.43_DE.NDTO_ZFMK2553395	50.56	6.8078	53.6525	11.4369	466.631	0.0304414
	G.mar.19_DE.MGSW_ZFMK19031	G.mar.43_DE.NDTO_ZFMK2553395	51.2299	7.054	53.6525	11.4369	400.642	0.0121766
	G.mar.20_DE.MGSW_ZFMK19044	G.mar.43_DE.NDTO_ZFMK2553395	50.8026	7.2418	53.6525	11.4369	426.275	0.0106545
	G.mar.21_DE.MGSW_ZFMK19045	G.mar.43_DE.NDTO_ZFMK2553395	51.3589	7.1697	53.6525	11.4369	384.94	0.00913242
	G.mar.22_DE.MGSW_ZFMK19046	G.mar.43_DE.NDTO_ZFMK2553395	51.2299	7.054	53.6525	11.4369	400.642	0.00913242
	G.mar.23_DE.MGSW_ZFMK19047	G.mar.43_DE.NDTO_ZFMK2553395	50.714	7.1772	53.6525	11.4369	436.727	0.0106545
	G.mar.24_DE.MGSW_ZFMK19048	G.mar.43_DE.NDTO_ZFMK2553395	50.6715	7.0469	53.6525	11.4369	446.253	0.0106545
	G.mar.25_DE.MGSW_ZFMK19049	G.mar.43_DE.NDTO_ZFMK2553395	51.291	7.2522	53.6525	11.4369	386.026	0.00913242
	G.mar.26_DE.MGSW_ZFMK19051	G.mar.43_DE.NDTO_ZFMK2553395	50.5511	7.1722	53.6525	11.4369	450.971	0.0304414
	G.mar.27_DE.MGSW_ZFMK19054	G.mar.43_DE.NDTO_ZFMK2553395	50.4647	7.2225	53.6525	11.4369	456.35	0.0304414
	G.mar.28_DE.MGSW_ZFMK19057	G.mar.43_DE.NDTO_ZFMK2553395	51.361	7.5499	53.6525	11.4369	365.913	0.00913242
	G.mar.29_DE.MGSW_ZFMK19539	G.mar.43_DE.NDTO_ZFMK2553395	50.6319	6.4731	53.6525	11.4369	476.512	0.0319635
	G.mar.30_DE.MGSW_ZFMK19550	G.mar.43_DE.NDTO_ZFMK2553395	50.7797	8.0085	53.6525	11.4369	395.375	0.00913242
	G.mar.31_DE.MGSW_ZFMK19555	G.mar.43_DE.NDTO_ZFMK2553395	50.7797	8.0085	53.6525	11.4369	395.375	0.0182648
	G.mar.32_DE.MGSW_ZFMK19558	G.mar.43_DE.NDTO_ZFMK2553395	50.7093	7.7132	53.6525	11.4369	413.823	0.0106545
	G.mar.33_DE.MGSW_ZFMK19560	G.mar.43_DE.NDTO_ZFMK2553395	50.7093	7.7132	53.6525	11.4369	413.823	0.00913242
	G.mar.34_DE.MGSW_ZFMK19561	G.mar.43_DE.NDTO_ZFMK2553395	50.7093	7.7132	53.6525	11.4369	413.823	0.00913242
	G.mar.35_DE.MGSW_ZFMK2516208	G.mar.43_DE.NDTO_ZFMK2553395	50.6245	7.1936	53.6525	11.4369	443.667	0.0136986
	G.mar.36_DE.MGSW_ZFMK2516209	G.mar.43_DE.NDTO_ZFMK2553395	50.6245	7.1936	53.6525	11.4369	443.667	0.0136986
	G.mar.37_DE.MGSW_ZFMK2557907	G.mar.43_DE.NDTO_ZFMK2553395	51.1821	10.2208	53.6525	11.4369	286.618	0
	G.mar.38_DE.MGSW_ZFMK2557908	G.mar.43_DE.NDTO_ZFMK2553395	51.1821	10.2208	53.6525	11.4369	286.618	0
	G.mar.39_DE.NDTO_ZFMK100409283	G.mar.43_DE.NDTO_ZFMK2553395	53.9192	10.0977	53.6525	11.4369	92.7818	0.00913242
	G.mar.40_DE.NDTO_ZFMK2538190	G.mar.43_DE.NDTO_ZFMK2553395	54.303	10.756	53.6525	11.4369	84.8844	0.00305344
	G.mar.41_DE.NDTO_ZFMK2538253	G.mar.43_DE.NDTO_ZFMK2553395	53.124	13.884	53.6525	11.4369	172.474	0.0152439
	G.mar.42_DE.NDTO_ZFMK2553394	G.mar.43_DE.NDTO_ZFMK2553395	53.6525	11.4369	53.6525	11.4369	0	0
	G.mar.01_DE.MGSO_GBOL33714	G.mar.44_DE.NDTO_ZFMK2553405	51.7429	10.7672	53.2794	12.0768	192.341	0.0106545
	G.mar.02_DE.MGSO_ZFMK100409275	G.mar.44_DE.NDTO_ZFMK2553405	51.7435	10.7673	53.2794	12.0768	192.278	0
	G.mar.03_DE.MGSO_ZFMK1634	G.mar.44_DE.NDTO_ZFMK2553405	51.841	10.326	53.2794	12.0768	198.831	0
	G.mar.04_DE.MGSO_ZFMK1909	G.mar.44_DE.NDTO_ZFMK2553405	50.8953	11.7527	53.2794	12.0768	265.855	0.00913242
	G.mar.05_DE.MGSO_ZFMK19531	G.mar.44_DE.NDTO_ZFMK2553405	50.8953	11.7527	53.2794	12.0768	265.855	0.00913242
	G.mar.06_DE.MGSO_ZFMK2503693	G.mar.44_DE.NDTO_ZFMK2553405	50.9194	11.5479	53.2794	12.0768	264.727	0.00913242
	G.mar.07_DE.MGSO_ZFMK2503694	G.mar.44_DE.NDTO_ZFMK2553405	50.9194	11.5479	53.2794	12.0768	264.727	0.00913242
	G.mar.08_DE.MGSO_ZFMK2542470	G.mar.44_DE.NDTO_ZFMK2553405	50.892	11.8209	53.2794	12.0768	265.874	0.00913242
	G.mar.09_DE.MGSO_ZFMK2542471	G.mar.44_DE.NDTO_ZFMK2553405	50.892	11.8209	53.2794	12.0768	265.874	0.0106545
	G.mar.10_DE.MGSO_ZFMK2542541	G.mar.44_DE.NDTO_ZFMK2553405	51.133	11.7487	53.2794	12.0768	239.562	0.00913242
	G.mar.11_DE.MGSO_ZFMK2542542	G.mar.44_DE.NDTO_ZFMK2553405	51.133	11.7487	53.2794	12.0768	239.562	0.00913242
	G.mar.12_DE.MGSW_ZFMK18967	G.mar.44_DE.NDTO_ZFMK2553405	50.6627	7.1026	53.2794	12.0768	447.607	0
	G.mar.13_DE.MGSW_ZFMK18987	G.mar.44_DE.NDTO_ZFMK2553405	50.6659	7.2156	53.2794	12.0768	441.518	0
	G.mar.14_DE.MGSW_ZFMK18988	G.mar.44_DE.NDTO_ZFMK2553405	50.6867	7.2997	53.2794	12.0768	435.615	0.00152207
	G.mar.15_DE.MGSW_ZFMK18991	G.mar.44_DE.NDTO_ZFMK2553405	50.7667	7.3667	53.2794	12.0768	426.105	0.00152207
	G.mar.16_DE.MGSW_ZFMK19003	G.mar.44_DE.NDTO_ZFMK2553405	51.361	7.5499	53.2794	12.0768	374.049	0.00152207
	G.mar.17_DE.MGSW_ZFMK19005	G.mar.44_DE.NDTO_ZFMK2553405	51.361	7.5499	53.2794	12.0768	374.049	0.00152207
	G.mar.18_DE.MGSW_ZFMK19029	G.mar.44_DE.NDTO_ZFMK2553405	50.56	6.8078	53.2794	12.0768	470.673	0.0304414
	G.mar.19_DE.MGSW_ZFMK19031	G.mar.44_DE.NDTO_ZFMK2553405	51.2299	7.054	53.2794	12.0768	410.48	0.0121766
	G.mar.20_DE.MGSW_ZFMK19044	G.mar.44_DE.NDTO_ZFMK2553405	50.8026	7.2418	53.2794	12.0768	429.923	0.00152207
	G.mar.21_DE.MGSW_ZFMK19045	G.mar.44_DE.NDTO_ZFMK2553405	51.3589	7.1697	53.2794	12.0768	395.658	0
	G.mar.22_DE.MGSW_ZFMK19046	G.mar.44_DE.NDTO_ZFMK2553405	51.2299	7.054	53.2794	12.0768	410.48	0
	G.mar.23_DE.MGSW_ZFMK19047	G.mar.44_DE.NDTO_ZFMK2553405	50.714	7.1772	53.2794	12.0768	439.885	0.00152207
	G.mar.24_DE.MGSW_ZFMK19048	G.mar.44_DE.NDTO_ZFMK2553405	50.6715	7.0469	53.2794	12.0768	449.854	0.00152207
	G.mar.25_DE.MGSW_ZFMK19049	G.mar.44_DE.NDTO_ZFMK2553405	51.291	7.2522	53.2794	12.0768	395.327	0
	G.mar.26_DE.MGSW_ZFMK19051	G.mar.44_DE.NDTO_ZFMK2553405	50.5511	7.1722	53.2794	12.0768	452.517	0.0304414
	G.mar.27_DE.MGSW_ZFMK19054	G.mar.44_DE.NDTO_ZFMK2553405	50.4647	7.2225	53.2794	12.0768	456.716	0.0304414
	G.mar.28_DE.MGSW_ZFMK19057	G.mar.44_DE.NDTO_ZFMK2553405	51.361	7.5499	53.2794	12.0768	374.049	0
	G.mar.29_DE.MGSW_ZFMK19539	G.mar.44_DE.NDTO_ZFMK2553405	50.6319	6.4731	53.2794	12.0768	483.322	0.0319635
	G.mar.30_DE.MGSW_ZFMK19550	G.mar.44_DE.NDTO_ZFMK2553405	50.7797	8.0085	53.2794	12.0768	392.984	0
	G.mar.31_DE.MGSW_ZFMK19555	G.mar.44_DE.NDTO_ZFMK2553405	50.7797	8.0085	53.2794	12.0768	392.984	0.0182648
	G.mar.32_DE.MGSW_ZFMK19558	G.mar.44_DE.NDTO_ZFMK2553405	50.7093	7.7132	53.2794	12.0768	413.039	0.00152207
	G.mar.33_DE.MGSW_ZFMK19560	G.mar.44_DE.NDTO_ZFMK2553405	50.7093	7.7132	53.2794	12.0768	413.039	0
	G.mar.34_DE.MGSW_ZFMK19561	G.mar.44_DE.NDTO_ZFMK2553405	50.7093	7.7132	53.2794	12.0768	413.039	0
	G.mar.35_DE.MGSW_ZFMK2516208	G.mar.44_DE.NDTO_ZFMK2553405	50.6245	7.1936	53.2794	12.0768	445.796	0.0167428
	G.mar.36_DE.MGSW_ZFMK2516209	G.mar.44_DE.NDTO_ZFMK2553405	50.6245	7.1936	53.2794	12.0768	445.796	0.0167428
	G.mar.37_DE.MGSW_ZFMK2557907	G.mar.44_DE.NDTO_ZFMK2553405	51.1821	10.2208	53.2794	12.0768	265.074	0.00913242
	G.mar.38_DE.MGSW_ZFMK2557908	G.mar.44_DE.NDTO_ZFMK2553405	51.1821	10.2208	53.2794	12.0768	265.074	0.00913242
	G.mar.39_DE.NDTO_ZFMK100409283	G.mar.44_DE.NDTO_ZFMK2553405	53.9192	10.0977	53.2794	12.0768	148.613	0
	G.mar.40_DE.NDTO_ZFMK2538190	G.mar.44_DE.NDTO_ZFMK2553405	54.303	10.756	53.2794	12.0768	143.019	0.00458015
	G.mar.41_DE.NDTO_ZFMK2538253	G.mar.44_DE.NDTO_ZFMK2553405	53.124	13.884	53.2794	12.0768	121.524	0.00914634
	G.mar.42_DE.NDTO_ZFMK2553394	G.mar.44_DE.NDTO_ZFMK2553405	53.6525	11.4369	53.2794	12.0768	59.2526	0.00913242
	G.mar.43_DE.NDTO_ZFMK2553395	G.mar.44_DE.NDTO_ZFMK2553405	53.6525	11.4369	53.2794	12.0768	59.2526	0.00913242
	G.mar.01_DE.MGSO_GBOL33714	G.mar.45_DE.NDTW_ZFMK100409272	51.7429	10.7672	52.9604	9.8927	147.74	0.0106545
	G.mar.02_DE.MGSO_ZFMK100409275	G.mar.45_DE.NDTW_ZFMK100409272	51.7435	10.7673	52.9604	9.8927	147.682	0.0121766
	G.mar.03_DE.MGSO_ZFMK1634	G.mar.45_DE.NDTW_ZFMK100409272	51.841	10.326	52.9604	9.8927	127.815	0.0121766
	G.mar.04_DE.MGSO_ZFMK1909	G.mar.45_DE.NDTW_ZFMK100409272	50.8953	11.7527	52.9604	9.8927	262.483	0.00913242
	G.mar.05_DE.MGSO_ZFMK19531	G.mar.45_DE.NDTW_ZFMK100409272	50.8953	11.7527	52.9604	9.8927	262.483	0.00913242
	G.mar.06_DE.MGSO_ZFMK2503693	G.mar.45_DE.NDTW_ZFMK100409272	50.9194	11.5479	52.9604	9.8927	253.556	0.00913242
	G.mar.07_DE.MGSO_ZFMK2503694	G.mar.45_DE.NDTW_ZFMK100409272	50.9194	11.5479	52.9604	9.8927	253.556	0.00913242
	G.mar.08_DE.MGSO_ZFMK2542470	G.mar.45_DE.NDTW_ZFMK100409272	50.892	11.8209	52.9604	9.8927	265.102	0.00913242
	G.mar.09_DE.MGSO_ZFMK2542471	G.mar.45_DE.NDTW_ZFMK100409272	50.892	11.8209	52.9604	9.8927	265.102	0.0106545
	G.mar.10_DE.MGSO_ZFMK2542541	G.mar.45_DE.NDTW_ZFMK100409272	51.133	11.7487	52.9604	9.8927	239.413	0.00913242
	G.mar.11_DE.MGSO_ZFMK2542542	G.mar.45_DE.NDTW_ZFMK100409272	51.133	11.7487	52.9604	9.8927	239.413	0.00913242
	G.mar.12_DE.MGSW_ZFMK18967	G.mar.45_DE.NDTW_ZFMK100409272	50.6627	7.1026	52.9604	9.8927	319.227	0.0121766
	G.mar.13_DE.MGSW_ZFMK18987	G.mar.45_DE.NDTW_ZFMK100409272	50.6659	7.2156	52.9604	9.8927	314.339	0.0121766
	G.mar.14_DE.MGSW_ZFMK18988	G.mar.45_DE.NDTW_ZFMK100409272	50.6867	7.2997	52.9604	9.8927	309.082	0.0136986
	G.mar.15_DE.MGSW_ZFMK18991	G.mar.45_DE.NDTW_ZFMK100409272	50.7667	7.3667	52.9604	9.8927	299.082	0.0136986
	G.mar.16_DE.MGSW_ZFMK19003	G.mar.45_DE.NDTW_ZFMK100409272	51.361	7.5499	52.9604	9.8927	238.922	0.0136986
	G.mar.17_DE.MGSW_ZFMK19005	G.mar.45_DE.NDTW_ZFMK100409272	51.361	7.5499	52.9604	9.8927	238.922	0.0106545
	G.mar.18_DE.MGSW_ZFMK19029	G.mar.45_DE.NDTW_ZFMK100409272	50.56	6.8078	52.9604	9.8927	340.778	0.0319635
	G.mar.19_DE.MGSW_ZFMK19031	G.mar.45_DE.NDTW_ZFMK100409272	51.2299	7.054	52.9604	9.8927	272.976	0.0152207
	G.mar.20_DE.MGSW_ZFMK19044	G.mar.45_DE.NDTW_ZFMK100409272	50.8026	7.2418	52.9604	9.8927	300.894	0.0136986
	G.mar.21_DE.MGSW_ZFMK19045	G.mar.45_DE.NDTW_ZFMK100409272	51.3589	7.1697	52.9604	9.8927	257.125	0.0121766
	G.mar.22_DE.MGSW_ZFMK19046	G.mar.45_DE.NDTW_ZFMK100409272	51.2299	7.054	52.9604	9.8927	272.976	0.0121766
	G.mar.23_DE.MGSW_ZFMK19047	G.mar.45_DE.NDTW_ZFMK100409272	50.714	7.1772	52.9604	9.8927	311.532	0.0136986
	G.mar.24_DE.MGSW_ZFMK19048	G.mar.45_DE.NDTW_ZFMK100409272	50.6715	7.0469	52.9604	9.8927	320.75	0.0106545
	G.mar.25_DE.MGSW_ZFMK19049	G.mar.45_DE.NDTW_ZFMK100409272	51.291	7.2522	52.9604	9.8927	258.552	0.0121766
	G.mar.26_DE.MGSW_ZFMK19051	G.mar.45_DE.NDTW_ZFMK100409272	50.5511	7.1722	52.9604	9.8927	326.6	0.0319635
	G.mar.27_DE.MGSW_ZFMK19054	G.mar.45_DE.NDTW_ZFMK100409272	50.4647	7.2225	52.9604	9.8927	332.689	0.0319635
	G.mar.28_DE.MGSW_ZFMK19057	G.mar.45_DE.NDTW_ZFMK100409272	51.361	7.5499	52.9604	9.8927	238.922	0.0121766
	G.mar.29_DE.MGSW_ZFMK19539	G.mar.45_DE.NDTW_ZFMK100409272	50.6319	6.4731	52.9604	9.8927	349.475	0.0334855
	G.mar.30_DE.MGSW_ZFMK19550	G.mar.45_DE.NDTW_ZFMK100409272	50.7797	8.0085	52.9604	9.8927	274.637	0.0121766
	G.mar.31_DE.MGSW_ZFMK19555	G.mar.45_DE.NDTW_ZFMK100409272	50.7797	8.0085	52.9604	9.8927	274.637	0.0243531
	G.mar.32_DE.MGSW_ZFMK19558	G.mar.45_DE.NDTW_ZFMK100409272	50.7093	7.7132	52.9604	9.8927	291.473	0.0136986
	G.mar.33_DE.MGSW_ZFMK19560	G.mar.45_DE.NDTW_ZFMK100409272	50.7093	7.7132	52.9604	9.8927	291.473	0.0121766
	G.mar.34_DE.MGSW_ZFMK19561	G.mar.45_DE.NDTW_ZFMK100409272	50.7093	7.7132	52.9604	9.8927	291.473	0.0121766
	G.mar.35_DE.MGSW_ZFMK2516208	G.mar.45_DE.NDTW_ZFMK100409272	50.6245	7.1936	52.9604	9.8927	319.005	0.0167428
	G.mar.36_DE.MGSW_ZFMK2516209	G.mar.45_DE.NDTW_ZFMK100409272	50.6245	7.1936	52.9604	9.8927	319.005	0.0167428
	G.mar.37_DE.MGSW_ZFMK2557907	G.mar.45_DE.NDTW_ZFMK100409272	51.1821	10.2208	52.9604	9.8927	198.88	0.00913242
	G.mar.38_DE.MGSW_ZFMK2557908	G.mar.45_DE.NDTW_ZFMK100409272	51.1821	10.2208	52.9604	9.8927	198.88	0.00913242
	G.mar.39_DE.NDTO_ZFMK100409283	G.mar.45_DE.NDTW_ZFMK100409272	53.9192	10.0977	52.9604	9.8927	107.407	0.0121766
	G.mar.40_DE.NDTO_ZFMK2538190	G.mar.45_DE.NDTW_ZFMK100409272	54.303	10.756	52.9604	9.8927	159.671	0.00763359
	G.mar.41_DE.NDTO_ZFMK2538253	G.mar.45_DE.NDTW_ZFMK100409272	53.124	13.884	52.9604	9.8927	267.248	0.0167683
	G.mar.42_DE.NDTO_ZFMK2553394	G.mar.45_DE.NDTW_ZFMK100409272	53.6525	11.4369	52.9604	9.8927	128.17	0.00913242
	G.mar.43_DE.NDTO_ZFMK2553395	G.mar.45_DE.NDTW_ZFMK100409272	53.6525	11.4369	52.9604	9.8927	128.17	0.00913242
	G.mar.44_DE.NDTO_ZFMK2553405	G.mar.45_DE.NDTW_ZFMK100409272	53.2794	12.0768	52.9604	9.8927	149.904	0.0121766
	G.mar.01_DE.MGSO_GBOL33714	G.mar.46_DE.NDTW_ZFMK19472	51.7429	10.7672	51.4423	7.2665	243.949	0.027439
	G.mar.02_DE.MGSO_ZFMK100409275	G.mar.46_DE.NDTW_ZFMK19472	51.7435	10.7673	51.4423	7.2665	243.963	0.0228659
	G.mar.03_DE.MGSO_ZFMK1634	G.mar.46_DE.NDTW_ZFMK19472	51.841	10.326	51.4423	7.2665	215.573	0.0228659
	G.mar.04_DE.MGSO_ZFMK1909	G.mar.46_DE.NDTW_ZFMK19472	50.8953	11.7527	51.4423	7.2665	318.393	0.0259146
	G.mar.05_DE.MGSO_ZFMK19531	G.mar.46_DE.NDTW_ZFMK19472	50.8953	11.7527	51.4423	7.2665	318.393	0.0259146
	G.mar.06_DE.MGSO_ZFMK2503693	G.mar.46_DE.NDTW_ZFMK19472	50.9194	11.5479	51.4423	7.2665	303.805	0.0259146
	G.mar.07_DE.MGSO_ZFMK2503694	G.mar.46_DE.NDTW_ZFMK19472	50.9194	11.5479	51.4423	7.2665	303.805	0.0259146
	G.mar.08_DE.MGSO_ZFMK2542470	G.mar.46_DE.NDTW_ZFMK19472	50.892	11.8209	51.4423	7.2665	323.137	0.0259146
	G.mar.09_DE.MGSO_ZFMK2542471	G.mar.46_DE.NDTW_ZFMK19472	50.892	11.8209	51.4423	7.2665	323.137	0.027439
	G.mar.10_DE.MGSO_ZFMK2542541	G.mar.46_DE.NDTW_ZFMK19472	51.133	11.7487	51.4423	7.2665	313.348	0.0259146
	G.mar.11_DE.MGSO_ZFMK2542542	G.mar.46_DE.NDTW_ZFMK19472	51.133	11.7487	51.4423	7.2665	313.348	0.0259146
	G.mar.12_DE.MGSW_ZFMK18967	G.mar.46_DE.NDTW_ZFMK19472	50.6627	7.1026	51.4423	7.2665	87.3863	0.0228659
	G.mar.13_DE.MGSW_ZFMK18987	G.mar.46_DE.NDTW_ZFMK19472	50.6659	7.2156	51.4423	7.2665	86.3508	0.0228659
	G.mar.14_DE.MGSW_ZFMK18988	G.mar.46_DE.NDTW_ZFMK19472	50.6867	7.2997	51.4423	7.2665	83.9981	0.0243902
	G.mar.15_DE.MGSW_ZFMK18991	G.mar.46_DE.NDTW_ZFMK19472	50.7667	7.3667	51.4423	7.2665	75.4009	0.0243902
	G.mar.16_DE.MGSW_ZFMK19003	G.mar.46_DE.NDTW_ZFMK19472	51.361	7.5499	51.4423	7.2665	21.6247	0.0243902
	G.mar.17_DE.MGSW_ZFMK19005	G.mar.46_DE.NDTW_ZFMK19472	51.361	7.5499	51.4423	7.2665	21.6247	0.0213415
	G.mar.18_DE.MGSW_ZFMK19029	G.mar.46_DE.NDTW_ZFMK19472	50.56	6.8078	51.4423	7.2665	103.159	0.00609756
	G.mar.19_DE.MGSW_ZFMK19031	G.mar.46_DE.NDTW_ZFMK19472	51.2299	7.054	51.4423	7.2665	27.8343	0.0137195
	G.mar.20_DE.MGSW_ZFMK19044	G.mar.46_DE.NDTW_ZFMK19472	50.8026	7.2418	51.4423	7.2665	71.1076	0.0243902
	G.mar.21_DE.MGSW_ZFMK19045	G.mar.46_DE.NDTW_ZFMK19472	51.3589	7.1697	51.4423	7.2665	11.4424	0.0228659
	G.mar.22_DE.MGSW_ZFMK19046	G.mar.46_DE.NDTW_ZFMK19472	51.2299	7.054	51.4423	7.2665	27.8343	0.0228659
	G.mar.23_DE.MGSW_ZFMK19047	G.mar.46_DE.NDTW_ZFMK19472	50.714	7.1772	51.4423	7.2665	81.1722	0.0243902
	G.mar.24_DE.MGSW_ZFMK19048	G.mar.46_DE.NDTW_ZFMK19472	50.6715	7.0469	51.4423	7.2665	87.0176	0.0213415
	G.mar.25_DE.MGSW_ZFMK19049	G.mar.46_DE.NDTW_ZFMK19472	51.291	7.2522	51.4423	7.2665	16.8425	0.0228659
	G.mar.26_DE.MGSW_ZFMK19051	G.mar.46_DE.NDTW_ZFMK19472	50.5511	7.1722	51.4423	7.2665	99.254	0.00609756
	G.mar.27_DE.MGSW_ZFMK19054	G.mar.46_DE.NDTW_ZFMK19472	50.4647	7.2225	51.4423	7.2665	108.68	0.00609756
	G.mar.28_DE.MGSW_ZFMK19057	G.mar.46_DE.NDTW_ZFMK19472	51.361	7.5499	51.4423	7.2665	21.6247	0.0228659
	G.mar.29_DE.MGSW_ZFMK19539	G.mar.46_DE.NDTW_ZFMK19472	50.6319	6.4731	51.4423	7.2665	105.752	0.00762195
	G.mar.30_DE.MGSW_ZFMK19550	G.mar.46_DE.NDTW_ZFMK19472	50.7797	8.0085	51.4423	7.2665	90.0064	0.0228659
	G.mar.31_DE.MGSW_ZFMK19555	G.mar.46_DE.NDTW_ZFMK19472	50.7797	8.0085	51.4423	7.2665	90.0064	0.0137195
	G.mar.32_DE.MGSW_ZFMK19558	G.mar.46_DE.NDTW_ZFMK19472	50.7093	7.7132	51.4423	7.2665	87.2209	0.0243902
	G.mar.33_DE.MGSW_ZFMK19560	G.mar.46_DE.NDTW_ZFMK19472	50.7093	7.7132	51.4423	7.2665	87.2209	0.0228659
	G.mar.34_DE.MGSW_ZFMK19561	G.mar.46_DE.NDTW_ZFMK19472	50.7093	7.7132	51.4423	7.2665	87.2209	0.0228659
	G.mar.35_DE.MGSW_ZFMK2516208	G.mar.46_DE.NDTW_ZFMK19472	50.6245	7.1936	51.4423	7.2665	91.0208	0.027439
	G.mar.36_DE.MGSW_ZFMK2516209	G.mar.46_DE.NDTW_ZFMK19472	50.6245	7.1936	51.4423	7.2665	91.0208	0.027439
	G.mar.37_DE.MGSW_ZFMK2557907	G.mar.46_DE.NDTW_ZFMK19472	51.1821	10.2208	51.4423	7.2665	207.223	0.0259146
	G.mar.38_DE.MGSW_ZFMK2557908	G.mar.46_DE.NDTW_ZFMK19472	51.1821	10.2208	51.4423	7.2665	207.223	0.0259146
	G.mar.39_DE.NDTO_ZFMK100409283	G.mar.46_DE.NDTW_ZFMK19472	53.9192	10.0977	51.4423	7.2665	334.816	0.0228659
	G.mar.40_DE.NDTO_ZFMK2538190	G.mar.46_DE.NDTW_ZFMK19472	54.303	10.756	51.4423	7.2665	394.661	0.0198777
	G.mar.41_DE.NDTO_ZFMK2538253	G.mar.46_DE.NDTW_ZFMK19472	53.124	13.884	51.4423	7.2665	486.907	0.0167939
	G.mar.42_DE.NDTO_ZFMK2553394	G.mar.46_DE.NDTW_ZFMK19472	53.6525	11.4369	51.4423	7.2665	373.715	0.0259146
	G.mar.43_DE.NDTO_ZFMK2553395	G.mar.46_DE.NDTW_ZFMK19472	53.6525	11.4369	51.4423	7.2665	373.715	0.0259146
	G.mar.44_DE.NDTO_ZFMK2553405	G.mar.46_DE.NDTW_ZFMK19472	53.2794	12.0768	51.4423	7.2665	384.896	0.0228659
	G.mar.45_DE.NDTW_ZFMK100409272	G.mar.46_DE.NDTW_ZFMK19472	52.9604	9.8927	51.4423	7.2665	245.839	0.027439
	G.mar.01_DE.MGSO_GBOL33714	G.mar.47_DE.SSL_ZFMK100409123	51.7429	10.7672	49.9826	9.7681	207.782	0.00152207
	G.mar.02_DE.MGSO_ZFMK100409275	G.mar.47_DE.SSL_ZFMK100409123	51.7435	10.7673	49.9826	9.7681	207.847	0.00913242
	G.mar.03_DE.MGSO_ZFMK1634	G.mar.47_DE.SSL_ZFMK100409123	51.841	10.326	49.9826	9.7681	210.18	0.00913242
	G.mar.04_DE.MGSO_ZFMK1909	G.mar.47_DE.SSL_ZFMK100409123	50.8953	11.7527	49.9826	9.7681	173.242	0
	G.mar.05_DE.MGSO_ZFMK19531	G.mar.47_DE.SSL_ZFMK100409123	50.8953	11.7527	49.9826	9.7681	173.242	0
	G.mar.06_DE.MGSO_ZFMK2503693	G.mar.47_DE.SSL_ZFMK100409123	50.9194	11.5479	49.9826	9.7681	163.383	0
	G.mar.07_DE.MGSO_ZFMK2503694	G.mar.47_DE.SSL_ZFMK100409123	50.9194	11.5479	49.9826	9.7681	163.383	0
	G.mar.08_DE.MGSO_ZFMK2542470	G.mar.47_DE.SSL_ZFMK100409123	50.892	11.8209	49.9826	9.7681	176.972	0
	G.mar.09_DE.MGSO_ZFMK2542471	G.mar.47_DE.SSL_ZFMK100409123	50.892	11.8209	49.9826	9.7681	176.972	0.00152207
	G.mar.10_DE.MGSO_ZFMK2542541	G.mar.47_DE.SSL_ZFMK100409123	51.133	11.7487	49.9826	9.7681	189.444	0
	G.mar.11_DE.MGSO_ZFMK2542542	G.mar.47_DE.SSL_ZFMK100409123	51.133	11.7487	49.9826	9.7681	189.444	0
	G.mar.12_DE.MGSW_ZFMK18967	G.mar.47_DE.SSL_ZFMK100409123	50.6627	7.1026	49.9826	9.7681	203.643	0.00913242
	G.mar.13_DE.MGSW_ZFMK18987	G.mar.47_DE.SSL_ZFMK100409123	50.6659	7.2156	49.9826	9.7681	196.353	0.00913242
	G.mar.14_DE.MGSW_ZFMK18988	G.mar.47_DE.SSL_ZFMK100409123	50.6867	7.2997	49.9826	9.7681	191.762	0.0106545
	G.mar.15_DE.MGSW_ZFMK18991	G.mar.47_DE.SSL_ZFMK100409123	50.7667	7.3667	49.9826	9.7681	191.187	0.0106545
	G.mar.16_DE.MGSW_ZFMK19003	G.mar.47_DE.SSL_ZFMK100409123	51.361	7.5499	49.9826	9.7681	218.767	0.0106545
	G.mar.17_DE.MGSW_ZFMK19005	G.mar.47_DE.SSL_ZFMK100409123	51.361	7.5499	49.9826	9.7681	218.767	0.00761035
	G.mar.18_DE.MGSW_ZFMK19029	G.mar.47_DE.SSL_ZFMK100409123	50.56	6.8078	49.9826	9.7681	219.813	0.0304414
	G.mar.19_DE.MGSW_ZFMK19031	G.mar.47_DE.SSL_ZFMK100409123	51.2299	7.054	49.9826	9.7681	236.302	0.0121766
	G.mar.20_DE.MGSW_ZFMK19044	G.mar.47_DE.SSL_ZFMK100409123	50.8026	7.2418	49.9826	9.7681	200.822	0.0106545
	G.mar.21_DE.MGSW_ZFMK19045	G.mar.47_DE.SSL_ZFMK100409123	51.3589	7.1697	49.9826	9.7681	238.471	0.00913242
	G.mar.22_DE.MGSW_ZFMK19046	G.mar.47_DE.SSL_ZFMK100409123	51.2299	7.054	49.9826	9.7681	236.302	0.00913242
	G.mar.23_DE.MGSW_ZFMK19047	G.mar.47_DE.SSL_ZFMK100409123	50.714	7.1772	49.9826	9.7681	200.884	0.0106545
	G.mar.24_DE.MGSW_ZFMK19048	G.mar.47_DE.SSL_ZFMK100409123	50.6715	7.0469	49.9826	9.7681	207.659	0.0106545
	G.mar.25_DE.MGSW_ZFMK19049	G.mar.47_DE.SSL_ZFMK100409123	51.291	7.2522	49.9826	9.7681	229.285	0.00913242
	G.mar.26_DE.MGSW_ZFMK19051	G.mar.47_DE.SSL_ZFMK100409123	50.5511	7.1722	49.9826	9.7681	194.903	0.0304414
	G.mar.27_DE.MGSW_ZFMK19054	G.mar.47_DE.SSL_ZFMK100409123	50.4647	7.2225	49.9826	9.7681	188.736	0.0304414
	G.mar.28_DE.MGSW_ZFMK19057	G.mar.47_DE.SSL_ZFMK100409123	51.361	7.5499	49.9826	9.7681	218.767	0.00913242
	G.mar.29_DE.MGSW_ZFMK19539	G.mar.47_DE.SSL_ZFMK100409123	50.6319	6.4731	49.9826	9.7681	244.707	0.0319635
	G.mar.30_DE.MGSW_ZFMK19550	G.mar.47_DE.SSL_ZFMK100409123	50.7797	8.0085	49.9826	9.7681	152.942	0.00913242
	G.mar.31_DE.MGSW_ZFMK19555	G.mar.47_DE.SSL_ZFMK100409123	50.7797	8.0085	49.9826	9.7681	152.942	0.0182648
	G.mar.32_DE.MGSW_ZFMK19558	G.mar.47_DE.SSL_ZFMK100409123	50.7093	7.7132	49.9826	9.7681	166.594	0.0106545
	G.mar.33_DE.MGSW_ZFMK19560	G.mar.47_DE.SSL_ZFMK100409123	50.7093	7.7132	49.9826	9.7681	166.594	0.00913242
	G.mar.34_DE.MGSW_ZFMK19561	G.mar.47_DE.SSL_ZFMK100409123	50.7093	7.7132	49.9826	9.7681	166.594	0.00913242
	G.mar.35_DE.MGSW_ZFMK2516208	G.mar.47_DE.SSL_ZFMK100409123	50.6245	7.1936	49.9826	9.7681	196.148	0.0136986
	G.mar.36_DE.MGSW_ZFMK2516209	G.mar.47_DE.SSL_ZFMK100409123	50.6245	7.1936	49.9826	9.7681	196.148	0.0136986
	G.mar.37_DE.MGSW_ZFMK2557907	G.mar.47_DE.SSL_ZFMK100409123	51.1821	10.2208	49.9826	9.7681	137.068	0
	G.mar.38_DE.MGSW_ZFMK2557908	G.mar.47_DE.SSL_ZFMK100409123	51.1821	10.2208	49.9826	9.7681	137.068	0
	G.mar.39_DE.NDTO_ZFMK100409283	G.mar.47_DE.SSL_ZFMK100409123	53.9192	10.0977	49.9826	9.7681	438.036	0.00913242
	G.mar.40_DE.NDTO_ZFMK2538190	G.mar.47_DE.SSL_ZFMK100409123	54.303	10.756	49.9826	9.7681	484.796	0.00305344
	G.mar.41_DE.NDTO_ZFMK2538253	G.mar.47_DE.SSL_ZFMK100409123	53.124	13.884	49.9826	9.7681	450.115	0.0152439
	G.mar.42_DE.NDTO_ZFMK2553394	G.mar.47_DE.SSL_ZFMK100409123	53.6525	11.4369	49.9826	9.7681	423.592	0
	G.mar.43_DE.NDTO_ZFMK2553395	G.mar.47_DE.SSL_ZFMK100409123	53.6525	11.4369	49.9826	9.7681	423.592	0
	G.mar.44_DE.NDTO_ZFMK2553405	G.mar.47_DE.SSL_ZFMK100409123	53.2794	12.0768	49.9826	9.7681	399.419	0.00913242
	G.mar.45_DE.NDTW_ZFMK100409272	G.mar.47_DE.SSL_ZFMK100409123	52.9604	9.8927	49.9826	9.7681	331.021	0.00913242
	G.mar.46_DE.NDTW_ZFMK19472	G.mar.47_DE.SSL_ZFMK100409123	51.4423	7.2665	49.9826	9.7681	239.343	0.0259146
	G.mar.01_DE.MGSO_GBOL33714	G.mar.48_DE.SSL_ZFMK100409296	51.7429	10.7672	49.8641	9.8573	218.337	0.00152207
	G.mar.02_DE.MGSO_ZFMK100409275	G.mar.48_DE.SSL_ZFMK100409296	51.7435	10.7673	49.8641	9.8573	218.403	0.00913242
	G.mar.03_DE.MGSO_ZFMK1634	G.mar.48_DE.SSL_ZFMK100409296	51.841	10.326	49.8641	9.8573	222.129	0.00913242
	G.mar.04_DE.MGSO_ZFMK1909	G.mar.48_DE.SSL_ZFMK100409296	50.8953	11.7527	49.8641	9.8573	176.546	0
	G.mar.05_DE.MGSO_ZFMK19531	G.mar.48_DE.SSL_ZFMK100409296	50.8953	11.7527	49.8641	9.8573	176.546	0
	G.mar.06_DE.MGSO_ZFMK2503693	G.mar.48_DE.SSL_ZFMK100409296	50.9194	11.5479	49.8641	9.8573	167.616	0
	G.mar.07_DE.MGSO_ZFMK2503694	G.mar.48_DE.SSL_ZFMK100409296	50.9194	11.5479	49.8641	9.8573	167.616	0
	G.mar.08_DE.MGSO_ZFMK2542470	G.mar.48_DE.SSL_ZFMK100409296	50.892	11.8209	49.8641	9.8573	180.02	0
	G.mar.09_DE.MGSO_ZFMK2542471	G.mar.48_DE.SSL_ZFMK100409296	50.892	11.8209	49.8641	9.8573	180.02	0.00152207
	G.mar.10_DE.MGSO_ZFMK2542541	G.mar.48_DE.SSL_ZFMK100409296	51.133	11.7487	49.8641	9.8573	194.3	0
	G.mar.11_DE.MGSO_ZFMK2542542	G.mar.48_DE.SSL_ZFMK100409296	51.133	11.7487	49.8641	9.8573	194.3	0
	G.mar.12_DE.MGSW_ZFMK18967	G.mar.48_DE.SSL_ZFMK100409296	50.6627	7.1026	49.8641	9.8573	214.852	0.00913242
	G.mar.13_DE.MGSW_ZFMK18987	G.mar.48_DE.SSL_ZFMK100409296	50.6659	7.2156	49.8641	9.8573	207.716	0.00913242
	G.mar.14_DE.MGSW_ZFMK18988	G.mar.48_DE.SSL_ZFMK100409296	50.6867	7.2997	49.8641	9.8573	203.33	0.0106545
	G.mar.15_DE.MGSW_ZFMK18991	G.mar.48_DE.SSL_ZFMK100409296	50.7667	7.3667	49.8641	9.8573	203.196	0.0106545
	G.mar.16_DE.MGSW_ZFMK19003	G.mar.48_DE.SSL_ZFMK100409296	51.361	7.5499	49.8641	9.8573	232.666	0.0106545
	G.mar.17_DE.MGSW_ZFMK19005	G.mar.48_DE.SSL_ZFMK100409296	51.361	7.5499	49.8641	9.8573	232.666	0.00761035
	G.mar.18_DE.MGSW_ZFMK19029	G.mar.48_DE.SSL_ZFMK100409296	50.56	6.8078	49.8641	9.8573	230.218	0.0304414
	G.mar.19_DE.MGSW_ZFMK19031	G.mar.48_DE.SSL_ZFMK100409296	51.2299	7.054	49.8641	9.8573	249.411	0.0121766
	G.mar.20_DE.MGSW_ZFMK19044	G.mar.48_DE.SSL_ZFMK100409296	50.8026	7.2418	49.8641	9.8573	212.812	0.0106545
	G.mar.21_DE.MGSW_ZFMK19045	G.mar.48_DE.SSL_ZFMK100409296	51.3589	7.1697	49.8641	9.8573	251.984	0.00913242
	G.mar.22_DE.MGSW_ZFMK19046	G.mar.48_DE.SSL_ZFMK100409296	51.2299	7.054	49.8641	9.8573	249.411	0.00913242
	G.mar.23_DE.MGSW_ZFMK19047	G.mar.48_DE.SSL_ZFMK100409296	50.714	7.1772	49.8641	9.8573	212.417	0.0106545
	G.mar.24_DE.MGSW_ZFMK19048	G.mar.48_DE.SSL_ZFMK100409296	50.6715	7.0469	49.8641	9.8573	218.843	0.0106545
	G.mar.25_DE.MGSW_ZFMK19049	G.mar.48_DE.SSL_ZFMK100409296	51.291	7.2522	49.8641	9.8573	242.746	0.00913242
	G.mar.26_DE.MGSW_ZFMK19051	G.mar.48_DE.SSL_ZFMK100409296	50.5511	7.1722	49.8641	9.8573	205.646	0.0304414
	G.mar.27_DE.MGSW_ZFMK19054	G.mar.48_DE.SSL_ZFMK100409296	50.4647	7.2225	49.8641	9.8573	199.067	0.0304414
	G.mar.28_DE.MGSW_ZFMK19057	G.mar.48_DE.SSL_ZFMK100409296	51.361	7.5499	49.8641	9.8573	232.666	0.00913242
	G.mar.29_DE.MGSW_ZFMK19539	G.mar.48_DE.SSL_ZFMK100409296	50.6319	6.4731	49.8641	9.8573	255.142	0.0319635
	G.mar.30_DE.MGSW_ZFMK19550	G.mar.48_DE.SSL_ZFMK100409296	50.7797	8.0085	49.8641	9.8573	166	0.00913242
	G.mar.31_DE.MGSW_ZFMK19555	G.mar.48_DE.SSL_ZFMK100409296	50.7797	8.0085	49.8641	9.8573	166	0.0182648
	G.mar.32_DE.MGSW_ZFMK19558	G.mar.48_DE.SSL_ZFMK100409296	50.7093	7.7132	49.8641	9.8573	178.868	0.0106545
	G.mar.33_DE.MGSW_ZFMK19560	G.mar.48_DE.SSL_ZFMK100409296	50.7093	7.7132	49.8641	9.8573	178.868	0.00913242
	G.mar.34_DE.MGSW_ZFMK19561	G.mar.48_DE.SSL_ZFMK100409296	50.7093	7.7132	49.8641	9.8573	178.868	0.00913242
	G.mar.35_DE.MGSW_ZFMK2516208	G.mar.48_DE.SSL_ZFMK100409296	50.6245	7.1936	49.8641	9.8573	207.287	0.0136986
	G.mar.36_DE.MGSW_ZFMK2516209	G.mar.48_DE.SSL_ZFMK100409296	50.6245	7.1936	49.8641	9.8573	207.287	0.0136986
	G.mar.37_DE.MGSW_ZFMK2557907	G.mar.48_DE.SSL_ZFMK100409296	51.1821	10.2208	49.8641	9.8573	148.697	0
	G.mar.38_DE.MGSW_ZFMK2557908	G.mar.48_DE.SSL_ZFMK100409296	51.1821	10.2208	49.8641	9.8573	148.697	0
	G.mar.39_DE.NDTO_ZFMK100409283	G.mar.48_DE.SSL_ZFMK100409296	53.9192	10.0977	49.8641	9.8573	450.924	0.00913242
	G.mar.40_DE.NDTO_ZFMK2538190	G.mar.48_DE.SSL_ZFMK100409296	54.303	10.756	49.8641	9.8573	497.065	0.00305344
	G.mar.41_DE.NDTO_ZFMK2538253	G.mar.48_DE.SSL_ZFMK100409296	53.124	13.884	49.8641	9.8573	456.841	0.0152439
	G.mar.42_DE.NDTO_ZFMK2553394	G.mar.48_DE.SSL_ZFMK100409296	53.6525	11.4369	49.8641	9.8573	434.752	0
	G.mar.43_DE.NDTO_ZFMK2553395	G.mar.48_DE.SSL_ZFMK100409296	53.6525	11.4369	49.8641	9.8573	434.752	0
	G.mar.44_DE.NDTO_ZFMK2553405	G.mar.48_DE.SSL_ZFMK100409296	53.2794	12.0768	49.8641	9.8573	409.265	0.00913242
	G.mar.45_DE.NDTW_ZFMK100409272	G.mar.48_DE.SSL_ZFMK100409296	52.9604	9.8927	49.8641	9.8573	344.085	0.00913242
	G.mar.46_DE.NDTW_ZFMK19472	G.mar.48_DE.SSL_ZFMK100409296	51.4423	7.2665	49.8641	9.8573	253.103	0.0259146
	G.mar.47_DE.SSL_ZFMK100409123	G.mar.48_DE.SSL_ZFMK100409296	49.9826	9.7681	49.8641	9.8573	14.6332	0
	G.mar.01_DE.MGSO_GBOL33714	G.mar.49_ES.CC_ZFMK1861	51.7429	10.7672	42.4298	-2.56196	1440.74	0.0121766
	G.mar.02_DE.MGSO_ZFMK100409275	G.mar.49_ES.CC_ZFMK1861	51.7435	10.7673	42.4298	-2.56196	1440.79	0.0167428
	G.mar.03_DE.MGSO_ZFMK1634	G.mar.49_ES.CC_ZFMK1861	51.841	10.326	42.4298	-2.56196	1425.2	0.0167428
	G.mar.04_DE.MGSO_ZFMK1909	G.mar.49_ES.CC_ZFMK1861	50.8953	11.7527	42.4298	-2.56196	1436.67	0.0106545
	G.mar.05_DE.MGSO_ZFMK19531	G.mar.49_ES.CC_ZFMK1861	50.8953	11.7527	42.4298	-2.56196	1436.67	0.0106545
	G.mar.06_DE.MGSO_ZFMK2503693	G.mar.49_ES.CC_ZFMK1861	50.9194	11.5479	42.4298	-2.56196	1426.56	0.0106545
	G.mar.07_DE.MGSO_ZFMK2503694	G.mar.49_ES.CC_ZFMK1861	50.9194	11.5479	42.4298	-2.56196	1426.56	0.0106545
	G.mar.08_DE.MGSO_ZFMK2542470	G.mar.49_ES.CC_ZFMK1861	50.892	11.8209	42.4298	-2.56196	1440.36	0.0106545
	G.mar.09_DE.MGSO_ZFMK2542471	G.mar.49_ES.CC_ZFMK1861	50.892	11.8209	42.4298	-2.56196	1440.36	0.0121766
	G.mar.10_DE.MGSO_ZFMK2542541	G.mar.49_ES.CC_ZFMK1861	51.133	11.7487	42.4298	-2.56196	1451.88	0.0106545
	G.mar.11_DE.MGSO_ZFMK2542542	G.mar.49_ES.CC_ZFMK1861	51.133	11.7487	42.4298	-2.56196	1451.88	0.0106545
	G.mar.12_DE.MGSW_ZFMK18967	G.mar.49_ES.CC_ZFMK1861	50.6627	7.1026	42.4298	-2.56196	1173.82	0.0167428
	G.mar.13_DE.MGSW_ZFMK18987	G.mar.49_ES.CC_ZFMK1861	50.6659	7.2156	42.4298	-2.56196	1179.48	0.0167428
	G.mar.14_DE.MGSW_ZFMK18988	G.mar.49_ES.CC_ZFMK1861	50.6867	7.2997	42.4298	-2.56196	1185.2	0.0182648
	G.mar.15_DE.MGSW_ZFMK18991	G.mar.49_ES.CC_ZFMK1861	50.7667	7.3667	42.4298	-2.56196	1194.92	0.0182648
	G.mar.16_DE.MGSW_ZFMK19003	G.mar.49_ES.CC_ZFMK1861	51.361	7.5499	42.4298	-2.56196	1252.4	0.0182648
	G.mar.17_DE.MGSW_ZFMK19005	G.mar.49_ES.CC_ZFMK1861	51.361	7.5499	42.4298	-2.56196	1252.4	0.0152207
	G.mar.18_DE.MGSW_ZFMK19029	G.mar.49_ES.CC_ZFMK1861	50.56	6.8078	42.4298	-2.56196	1151.39	0.0319635
	G.mar.19_DE.MGSW_ZFMK19031	G.mar.49_ES.CC_ZFMK1861	51.2299	7.054	42.4298	-2.56196	1218.81	0.0136986
	G.mar.20_DE.MGSW_ZFMK19044	G.mar.49_ES.CC_ZFMK1861	50.8026	7.2418	42.4298	-2.56196	1191.89	0.0182648
	G.mar.21_DE.MGSW_ZFMK19045	G.mar.49_ES.CC_ZFMK1861	51.3589	7.1697	42.4298	-2.56196	1234.93	0.0167428
	G.mar.22_DE.MGSW_ZFMK19046	G.mar.49_ES.CC_ZFMK1861	51.2299	7.054	42.4298	-2.56196	1218.81	0.0167428
	G.mar.23_DE.MGSW_ZFMK19047	G.mar.49_ES.CC_ZFMK1861	50.714	7.1772	42.4298	-2.56196	1181.57	0.0182648
	G.mar.24_DE.MGSW_ZFMK19048	G.mar.49_ES.CC_ZFMK1861	50.6715	7.0469	42.4298	-2.56196	1171.89	0.0152207
	G.mar.25_DE.MGSW_ZFMK19049	G.mar.49_ES.CC_ZFMK1861	51.291	7.2522	42.4298	-2.56196	1232.93	0.0167428
	G.mar.26_DE.MGSW_ZFMK19051	G.mar.49_ES.CC_ZFMK1861	50.5511	7.1722	42.4298	-2.56196	1168.06	0.0319635
	G.mar.27_DE.MGSW_ZFMK19054	G.mar.49_ES.CC_ZFMK1861	50.4647	7.2225	42.4298	-2.56196	1163.53	0.0319635
	G.mar.28_DE.MGSW_ZFMK19057	G.mar.49_ES.CC_ZFMK1861	51.361	7.5499	42.4298	-2.56196	1252.4	0.0167428
	G.mar.29_DE.MGSW_ZFMK19539	G.mar.49_ES.CC_ZFMK1861	50.6319	6.4731	42.4298	-2.56196	1141.84	0.0334855
	G.mar.30_DE.MGSW_ZFMK19550	G.mar.49_ES.CC_ZFMK1861	50.7797	8.0085	42.4298	-2.56196	1227.29	0.0167428
	G.mar.31_DE.MGSW_ZFMK19555	G.mar.49_ES.CC_ZFMK1861	50.7797	8.0085	42.4298	-2.56196	1227.29	0.0258752
	G.mar.32_DE.MGSW_ZFMK19558	G.mar.49_ES.CC_ZFMK1861	50.7093	7.7132	42.4298	-2.56196	1207.13	0.0182648
	G.mar.33_DE.MGSW_ZFMK19560	G.mar.49_ES.CC_ZFMK1861	50.7093	7.7132	42.4298	-2.56196	1207.13	0.0167428
	G.mar.34_DE.MGSW_ZFMK19561	G.mar.49_ES.CC_ZFMK1861	50.7093	7.7132	42.4298	-2.56196	1207.13	0.0167428
	G.mar.35_DE.MGSW_ZFMK2516208	G.mar.49_ES.CC_ZFMK1861	50.6245	7.1936	42.4298	-2.56196	1175.05	0.00913242
	G.mar.36_DE.MGSW_ZFMK2516209	G.mar.49_ES.CC_ZFMK1861	50.6245	7.1936	42.4298	-2.56196	1175.05	0.00913242
	G.mar.37_DE.MGSW_ZFMK2557907	G.mar.49_ES.CC_ZFMK1861	51.1821	10.2208	42.4298	-2.56196	1371.53	0.0106545
	G.mar.38_DE.MGSW_ZFMK2557908	G.mar.49_ES.CC_ZFMK1861	51.1821	10.2208	42.4298	-2.56196	1371.53	0.0106545
	G.mar.39_DE.NDTO_ZFMK100409283	G.mar.49_ES.CC_ZFMK1861	53.9192	10.0977	42.4298	-2.56196	1579.31	0.0167428
	G.mar.40_DE.NDTO_ZFMK2538190	G.mar.49_ES.CC_ZFMK1861	54.303	10.756	42.4298	-2.56196	1639.67	0.00916031
	G.mar.41_DE.NDTO_ZFMK2538253	G.mar.49_ES.CC_ZFMK1861	53.124	13.884	42.4298	-2.56196	1701.35	0.0213415
	G.mar.42_DE.NDTO_ZFMK2553394	G.mar.49_ES.CC_ZFMK1861	53.6525	11.4369	42.4298	-2.56196	1617.96	0.0106545
	G.mar.43_DE.NDTO_ZFMK2553395	G.mar.49_ES.CC_ZFMK1861	53.6525	11.4369	42.4298	-2.56196	1617.96	0.0106545
	G.mar.44_DE.NDTO_ZFMK2553405	G.mar.49_ES.CC_ZFMK1861	53.2794	12.0768	42.4298	-2.56196	1620.16	0.0167428
	G.mar.45_DE.NDTW_ZFMK100409272	G.mar.49_ES.CC_ZFMK1861	52.9604	9.8927	42.4298	-2.56196	1491.31	0.0136986
	G.mar.46_DE.NDTW_ZFMK19472	G.mar.49_ES.CC_ZFMK1861	51.4423	7.2665	42.4298	-2.56196	1246.34	0.027439
	G.mar.47_DE.SSL_ZFMK100409123	G.mar.49_ES.CC_ZFMK1861	49.9826	9.7681	42.4298	-2.56196	1263.43	0.0106545
	G.mar.48_DE.SSL_ZFMK100409296	G.mar.49_ES.CC_ZFMK1861	49.8641	9.8573	42.4298	-2.56196	1260.71	0.0106545
	G.mar.01_DE.MGSO_GBOL33714	G.mar.50_ES.CC_ZFMK1863	51.7429	10.7672	43.2338	-1.63782	1323.89	0.0136986
	G.mar.02_DE.MGSO_ZFMK100409275	G.mar.50_ES.CC_ZFMK1863	51.7435	10.7673	43.2338	-1.63782	1323.94	0.0182648
	G.mar.03_DE.MGSO_ZFMK1634	G.mar.50_ES.CC_ZFMK1863	51.841	10.326	43.2338	-1.63782	1308.39	0.0182648
	G.mar.04_DE.MGSO_ZFMK1909	G.mar.50_ES.CC_ZFMK1863	50.8953	11.7527	43.2338	-1.63782	1320.19	0.0121766
	G.mar.05_DE.MGSO_ZFMK19531	G.mar.50_ES.CC_ZFMK1863	50.8953	11.7527	43.2338	-1.63782	1320.19	0.0121766
	G.mar.06_DE.MGSO_ZFMK2503693	G.mar.50_ES.CC_ZFMK1863	50.9194	11.5479	43.2338	-1.63782	1310.01	0.0121766
	G.mar.07_DE.MGSO_ZFMK2503694	G.mar.50_ES.CC_ZFMK1863	50.9194	11.5479	43.2338	-1.63782	1310.01	0.0121766
	G.mar.08_DE.MGSO_ZFMK2542470	G.mar.50_ES.CC_ZFMK1863	50.892	11.8209	43.2338	-1.63782	1323.9	0.0121766
	G.mar.09_DE.MGSO_ZFMK2542471	G.mar.50_ES.CC_ZFMK1863	50.892	11.8209	43.2338	-1.63782	1323.9	0.0136986
	G.mar.10_DE.MGSO_ZFMK2542541	G.mar.50_ES.CC_ZFMK1863	51.133	11.7487	43.2338	-1.63782	1335.27	0.0121766
	G.mar.11_DE.MGSO_ZFMK2542542	G.mar.50_ES.CC_ZFMK1863	51.133	11.7487	43.2338	-1.63782	1335.27	0.0121766
	G.mar.12_DE.MGSW_ZFMK18967	G.mar.50_ES.CC_ZFMK1863	50.6627	7.1026	43.2338	-1.63782	1057.33	0.0182648
	G.mar.13_DE.MGSW_ZFMK18987	G.mar.50_ES.CC_ZFMK1863	50.6659	7.2156	43.2338	-1.63782	1062.95	0.0182648
	G.mar.14_DE.MGSW_ZFMK18988	G.mar.50_ES.CC_ZFMK1863	50.6867	7.2997	43.2338	-1.63782	1068.66	0.0197869
	G.mar.15_DE.MGSW_ZFMK18991	G.mar.50_ES.CC_ZFMK1863	50.7667	7.3667	43.2338	-1.63782	1078.39	0.0197869
	G.mar.16_DE.MGSW_ZFMK19003	G.mar.50_ES.CC_ZFMK1863	51.361	7.5499	43.2338	-1.63782	1136.18	0.0197869
	G.mar.17_DE.MGSW_ZFMK19005	G.mar.50_ES.CC_ZFMK1863	51.361	7.5499	43.2338	-1.63782	1136.18	0.0167428
	G.mar.18_DE.MGSW_ZFMK19029	G.mar.50_ES.CC_ZFMK1863	50.56	6.8078	43.2338	-1.63782	1034.98	0.0304414
	G.mar.19_DE.MGSW_ZFMK19031	G.mar.50_ES.CC_ZFMK1863	51.2299	7.054	43.2338	-1.63782	1102.78	0.0121766
	G.mar.20_DE.MGSW_ZFMK19044	G.mar.50_ES.CC_ZFMK1863	50.8026	7.2418	43.2338	-1.63782	1075.44	0.0197869
	G.mar.21_DE.MGSW_ZFMK19045	G.mar.50_ES.CC_ZFMK1863	51.3589	7.1697	43.2338	-1.63782	1118.94	0.0182648
	G.mar.22_DE.MGSW_ZFMK19046	G.mar.50_ES.CC_ZFMK1863	51.2299	7.054	43.2338	-1.63782	1102.78	0.0182648
	G.mar.23_DE.MGSW_ZFMK19047	G.mar.50_ES.CC_ZFMK1863	50.714	7.1772	43.2338	-1.63782	1065.09	0.0197869
	G.mar.24_DE.MGSW_ZFMK19048	G.mar.50_ES.CC_ZFMK1863	50.6715	7.0469	43.2338	-1.63782	1055.44	0.0167428
	G.mar.25_DE.MGSW_ZFMK19049	G.mar.50_ES.CC_ZFMK1863	51.291	7.2522	43.2338	-1.63782	1116.83	0.0182648
	G.mar.26_DE.MGSW_ZFMK19051	G.mar.50_ES.CC_ZFMK1863	50.5511	7.1722	43.2338	-1.63782	1051.49	0.0304414
	G.mar.27_DE.MGSW_ZFMK19054	G.mar.50_ES.CC_ZFMK1863	50.4647	7.2225	43.2338	-1.63782	1046.89	0.0304414
	G.mar.28_DE.MGSW_ZFMK19057	G.mar.50_ES.CC_ZFMK1863	51.361	7.5499	43.2338	-1.63782	1136.18	0.0182648
	G.mar.29_DE.MGSW_ZFMK19539	G.mar.50_ES.CC_ZFMK1863	50.6319	6.4731	43.2338	-1.63782	1025.67	0.0319635
	G.mar.30_DE.MGSW_ZFMK19550	G.mar.50_ES.CC_ZFMK1863	50.7797	8.0085	43.2338	-1.63782	1110.56	0.0182648
	G.mar.31_DE.MGSW_ZFMK19555	G.mar.50_ES.CC_ZFMK1863	50.7797	8.0085	43.2338	-1.63782	1110.56	0.0243531
	G.mar.32_DE.MGSW_ZFMK19558	G.mar.50_ES.CC_ZFMK1863	50.7093	7.7132	43.2338	-1.63782	1090.45	0.0197869
	G.mar.33_DE.MGSW_ZFMK19560	G.mar.50_ES.CC_ZFMK1863	50.7093	7.7132	43.2338	-1.63782	1090.45	0.0182648
	G.mar.34_DE.MGSW_ZFMK19561	G.mar.50_ES.CC_ZFMK1863	50.7093	7.7132	43.2338	-1.63782	1090.45	0.0182648
	G.mar.35_DE.MGSW_ZFMK2516208	G.mar.50_ES.CC_ZFMK1863	50.6245	7.1936	43.2338	-1.63782	1058.51	0.0106545
	G.mar.36_DE.MGSW_ZFMK2516209	G.mar.50_ES.CC_ZFMK1863	50.6245	7.1936	43.2338	-1.63782	1058.51	0.0106545
	G.mar.37_DE.MGSW_ZFMK2557907	G.mar.50_ES.CC_ZFMK1863	51.1821	10.2208	43.2338	-1.63782	1254.69	0.0121766
	G.mar.38_DE.MGSW_ZFMK2557908	G.mar.50_ES.CC_ZFMK1863	51.1821	10.2208	43.2338	-1.63782	1254.69	0.0121766
	G.mar.39_DE.NDTO_ZFMK100409283	G.mar.50_ES.CC_ZFMK1863	53.9192	10.0977	43.2338	-1.63782	1463.72	0.0182648
	G.mar.40_DE.NDTO_ZFMK2538190	G.mar.50_ES.CC_ZFMK1863	54.303	10.756	43.2338	-1.63782	1524.03	0.010687
	G.mar.41_DE.NDTO_ZFMK2538253	G.mar.50_ES.CC_ZFMK1863	53.124	13.884	43.2338	-1.63782	1584.5	0.0198171
	G.mar.42_DE.NDTO_ZFMK2553394	G.mar.50_ES.CC_ZFMK1863	53.6525	11.4369	43.2338	-1.63782	1501.59	0.0121766
	G.mar.43_DE.NDTO_ZFMK2553395	G.mar.50_ES.CC_ZFMK1863	53.6525	11.4369	43.2338	-1.63782	1501.59	0.0121766
	G.mar.44_DE.NDTO_ZFMK2553405	G.mar.50_ES.CC_ZFMK1863	53.2794	12.0768	43.2338	-1.63782	1503.48	0.0182648
	G.mar.45_DE.NDTW_ZFMK100409272	G.mar.50_ES.CC_ZFMK1863	52.9604	9.8927	43.2338	-1.63782	1375.1	0.0152207
	G.mar.46_DE.NDTW_ZFMK19472	G.mar.50_ES.CC_ZFMK1863	51.4423	7.2665	43.2338	-1.63782	1130.36	0.0259146
	G.mar.47_DE.SSL_ZFMK100409123	G.mar.50_ES.CC_ZFMK1863	49.9826	9.7681	43.2338	-1.63782	1146.95	0.0121766
	G.mar.48_DE.SSL_ZFMK100409296	G.mar.50_ES.CC_ZFMK1863	49.8641	9.8573	43.2338	-1.63782	1144.35	0.0121766
	G.mar.49_ES.CC_ZFMK1861	G.mar.50_ES.CC_ZFMK1863	42.4298	-2.56196	43.2338	-1.63782	116.85	0.00761035
	G.mar.01_DE.MGSO_GBOL33714	G.mar.51_ES.CC_ZFMK1893	51.7429	10.7672	43.2338	-1.63782	1323.89	0.0121766
	G.mar.02_DE.MGSO_ZFMK100409275	G.mar.51_ES.CC_ZFMK1893	51.7435	10.7673	43.2338	-1.63782	1323.94	0.0167428
	G.mar.03_DE.MGSO_ZFMK1634	G.mar.51_ES.CC_ZFMK1893	51.841	10.326	43.2338	-1.63782	1308.39	0.0167428
	G.mar.04_DE.MGSO_ZFMK1909	G.mar.51_ES.CC_ZFMK1893	50.8953	11.7527	43.2338	-1.63782	1320.19	0.0106545
	G.mar.05_DE.MGSO_ZFMK19531	G.mar.51_ES.CC_ZFMK1893	50.8953	11.7527	43.2338	-1.63782	1320.19	0.0106545
	G.mar.06_DE.MGSO_ZFMK2503693	G.mar.51_ES.CC_ZFMK1893	50.9194	11.5479	43.2338	-1.63782	1310.01	0.0106545
	G.mar.07_DE.MGSO_ZFMK2503694	G.mar.51_ES.CC_ZFMK1893	50.9194	11.5479	43.2338	-1.63782	1310.01	0.0106545
	G.mar.08_DE.MGSO_ZFMK2542470	G.mar.51_ES.CC_ZFMK1893	50.892	11.8209	43.2338	-1.63782	1323.9	0.0106545
	G.mar.09_DE.MGSO_ZFMK2542471	G.mar.51_ES.CC_ZFMK1893	50.892	11.8209	43.2338	-1.63782	1323.9	0.0121766
	G.mar.10_DE.MGSO_ZFMK2542541	G.mar.51_ES.CC_ZFMK1893	51.133	11.7487	43.2338	-1.63782	1335.27	0.0106545
	G.mar.11_DE.MGSO_ZFMK2542542	G.mar.51_ES.CC_ZFMK1893	51.133	11.7487	43.2338	-1.63782	1335.27	0.0106545
	G.mar.12_DE.MGSW_ZFMK18967	G.mar.51_ES.CC_ZFMK1893	50.6627	7.1026	43.2338	-1.63782	1057.33	0.0167428
	G.mar.13_DE.MGSW_ZFMK18987	G.mar.51_ES.CC_ZFMK1893	50.6659	7.2156	43.2338	-1.63782	1062.95	0.0167428
	G.mar.14_DE.MGSW_ZFMK18988	G.mar.51_ES.CC_ZFMK1893	50.6867	7.2997	43.2338	-1.63782	1068.66	0.0182648
	G.mar.15_DE.MGSW_ZFMK18991	G.mar.51_ES.CC_ZFMK1893	50.7667	7.3667	43.2338	-1.63782	1078.39	0.0182648
	G.mar.16_DE.MGSW_ZFMK19003	G.mar.51_ES.CC_ZFMK1893	51.361	7.5499	43.2338	-1.63782	1136.18	0.0182648
	G.mar.17_DE.MGSW_ZFMK19005	G.mar.51_ES.CC_ZFMK1893	51.361	7.5499	43.2338	-1.63782	1136.18	0.0152207
	G.mar.18_DE.MGSW_ZFMK19029	G.mar.51_ES.CC_ZFMK1893	50.56	6.8078	43.2338	-1.63782	1034.98	0.0319635
	G.mar.19_DE.MGSW_ZFMK19031	G.mar.51_ES.CC_ZFMK1893	51.2299	7.054	43.2338	-1.63782	1102.78	0.0136986
	G.mar.20_DE.MGSW_ZFMK19044	G.mar.51_ES.CC_ZFMK1893	50.8026	7.2418	43.2338	-1.63782	1075.44	0.0182648
	G.mar.21_DE.MGSW_ZFMK19045	G.mar.51_ES.CC_ZFMK1893	51.3589	7.1697	43.2338	-1.63782	1118.94	0.0167428
	G.mar.22_DE.MGSW_ZFMK19046	G.mar.51_ES.CC_ZFMK1893	51.2299	7.054	43.2338	-1.63782	1102.78	0.0167428
	G.mar.23_DE.MGSW_ZFMK19047	G.mar.51_ES.CC_ZFMK1893	50.714	7.1772	43.2338	-1.63782	1065.09	0.0182648
	G.mar.24_DE.MGSW_ZFMK19048	G.mar.51_ES.CC_ZFMK1893	50.6715	7.0469	43.2338	-1.63782	1055.44	0.0152207
	G.mar.25_DE.MGSW_ZFMK19049	G.mar.51_ES.CC_ZFMK1893	51.291	7.2522	43.2338	-1.63782	1116.83	0.0167428
	G.mar.26_DE.MGSW_ZFMK19051	G.mar.51_ES.CC_ZFMK1893	50.5511	7.1722	43.2338	-1.63782	1051.49	0.0319635
	G.mar.27_DE.MGSW_ZFMK19054	G.mar.51_ES.CC_ZFMK1893	50.4647	7.2225	43.2338	-1.63782	1046.89	0.0319635
	G.mar.28_DE.MGSW_ZFMK19057	G.mar.51_ES.CC_ZFMK1893	51.361	7.5499	43.2338	-1.63782	1136.18	0.0167428
	G.mar.29_DE.MGSW_ZFMK19539	G.mar.51_ES.CC_ZFMK1893	50.6319	6.4731	43.2338	-1.63782	1025.67	0.0304414
	G.mar.30_DE.MGSW_ZFMK19550	G.mar.51_ES.CC_ZFMK1893	50.7797	8.0085	43.2338	-1.63782	1110.56	0.0167428
	G.mar.31_DE.MGSW_ZFMK19555	G.mar.51_ES.CC_ZFMK1893	50.7797	8.0085	43.2338	-1.63782	1110.56	0.0228311
	G.mar.32_DE.MGSW_ZFMK19558	G.mar.51_ES.CC_ZFMK1893	50.7093	7.7132	43.2338	-1.63782	1090.45	0.0182648
	G.mar.33_DE.MGSW_ZFMK19560	G.mar.51_ES.CC_ZFMK1893	50.7093	7.7132	43.2338	-1.63782	1090.45	0.0167428
	G.mar.34_DE.MGSW_ZFMK19561	G.mar.51_ES.CC_ZFMK1893	50.7093	7.7132	43.2338	-1.63782	1090.45	0.0167428
	G.mar.35_DE.MGSW_ZFMK2516208	G.mar.51_ES.CC_ZFMK1893	50.6245	7.1936	43.2338	-1.63782	1058.51	0.00913242
	G.mar.36_DE.MGSW_ZFMK2516209	G.mar.51_ES.CC_ZFMK1893	50.6245	7.1936	43.2338	-1.63782	1058.51	0.00913242
	G.mar.37_DE.MGSW_ZFMK2557907	G.mar.51_ES.CC_ZFMK1893	51.1821	10.2208	43.2338	-1.63782	1254.69	0.0106545
	G.mar.38_DE.MGSW_ZFMK2557908	G.mar.51_ES.CC_ZFMK1893	51.1821	10.2208	43.2338	-1.63782	1254.69	0.0106545
	G.mar.39_DE.NDTO_ZFMK100409283	G.mar.51_ES.CC_ZFMK1893	53.9192	10.0977	43.2338	-1.63782	1463.72	0.0167428
	G.mar.40_DE.NDTO_ZFMK2538190	G.mar.51_ES.CC_ZFMK1893	54.303	10.756	43.2338	-1.63782	1524.03	0.00916031
	G.mar.41_DE.NDTO_ZFMK2538253	G.mar.51_ES.CC_ZFMK1893	53.124	13.884	43.2338	-1.63782	1584.5	0.0213415
	G.mar.42_DE.NDTO_ZFMK2553394	G.mar.51_ES.CC_ZFMK1893	53.6525	11.4369	43.2338	-1.63782	1501.59	0.0106545
	G.mar.43_DE.NDTO_ZFMK2553395	G.mar.51_ES.CC_ZFMK1893	53.6525	11.4369	43.2338	-1.63782	1501.59	0.0106545
	G.mar.44_DE.NDTO_ZFMK2553405	G.mar.51_ES.CC_ZFMK1893	53.2794	12.0768	43.2338	-1.63782	1503.48	0.0167428
	G.mar.45_DE.NDTW_ZFMK100409272	G.mar.51_ES.CC_ZFMK1893	52.9604	9.8927	43.2338	-1.63782	1375.1	0.0136986
	G.mar.46_DE.NDTW_ZFMK19472	G.mar.51_ES.CC_ZFMK1893	51.4423	7.2665	43.2338	-1.63782	1130.36	0.027439
	G.mar.47_DE.SSL_ZFMK100409123	G.mar.51_ES.CC_ZFMK1893	49.9826	9.7681	43.2338	-1.63782	1146.95	0.0106545
	G.mar.48_DE.SSL_ZFMK100409296	G.mar.51_ES.CC_ZFMK1893	49.8641	9.8573	43.2338	-1.63782	1144.35	0.0106545
	G.mar.49_ES.CC_ZFMK1861	G.mar.51_ES.CC_ZFMK1893	42.4298	-2.56196	43.2338	-1.63782	116.85	0.00608828
	G.mar.50_ES.CC_ZFMK1863	G.mar.51_ES.CC_ZFMK1893	43.2338	-1.63782	43.2338	-1.63782	0	0.00456621
	G.mar.01_DE.MGSO_GBOL33714	G.mar.52_ES.PYRS_ZFMK2517202	51.7429	10.7672	41.3155	1.10444	1371.57	0.00913242
	G.mar.02_DE.MGSO_ZFMK100409275	G.mar.52_ES.PYRS_ZFMK2517202	51.7435	10.7673	41.3155	1.10444	1371.63	0.0136986
	G.mar.03_DE.MGSO_ZFMK1634	G.mar.52_ES.PYRS_ZFMK2517202	51.841	10.326	41.3155	1.10444	1362.93	0.0136986
	G.mar.04_DE.MGSO_ZFMK1909	G.mar.52_ES.PYRS_ZFMK2517202	50.8953	11.7527	41.3155	1.10444	1341.16	0.00761035
	G.mar.05_DE.MGSO_ZFMK19531	G.mar.52_ES.PYRS_ZFMK2517202	50.8953	11.7527	41.3155	1.10444	1341.16	0.00761035
	G.mar.06_DE.MGSO_ZFMK2503693	G.mar.52_ES.PYRS_ZFMK2517202	50.9194	11.5479	41.3155	1.10444	1333.71	0.00761035
	G.mar.07_DE.MGSO_ZFMK2503694	G.mar.52_ES.PYRS_ZFMK2517202	50.9194	11.5479	41.3155	1.10444	1333.71	0.00761035
	G.mar.08_DE.MGSO_ZFMK2542470	G.mar.52_ES.PYRS_ZFMK2517202	50.892	11.8209	41.3155	1.10444	1344.06	0.00761035
	G.mar.09_DE.MGSO_ZFMK2542471	G.mar.52_ES.PYRS_ZFMK2517202	50.892	11.8209	41.3155	1.10444	1344.06	0.00913242
	G.mar.10_DE.MGSO_ZFMK2542541	G.mar.52_ES.PYRS_ZFMK2517202	51.133	11.7487	41.3155	1.10444	1360.84	0.00761035
	G.mar.11_DE.MGSO_ZFMK2542542	G.mar.52_ES.PYRS_ZFMK2517202	51.133	11.7487	41.3155	1.10444	1360.84	0.00761035
	G.mar.12_DE.MGSW_ZFMK18967	G.mar.52_ES.PYRS_ZFMK2517202	50.6627	7.1026	41.3155	1.10444	1136.35	0.0136986
	G.mar.13_DE.MGSW_ZFMK18987	G.mar.52_ES.PYRS_ZFMK2517202	50.6659	7.2156	41.3155	1.10444	1140.21	0.0136986
	G.mar.14_DE.MGSW_ZFMK18988	G.mar.52_ES.PYRS_ZFMK2517202	50.6867	7.2997	41.3155	1.10444	1144.95	0.0152207
	G.mar.15_DE.MGSW_ZFMK18991	G.mar.52_ES.PYRS_ZFMK2517202	50.7667	7.3667	41.3155	1.10444	1155.01	0.0152207
	G.mar.16_DE.MGSW_ZFMK19003	G.mar.52_ES.PYRS_ZFMK2517202	51.361	7.5499	41.3155	1.10444	1219.77	0.0152207
	G.mar.17_DE.MGSW_ZFMK19005	G.mar.52_ES.PYRS_ZFMK2517202	51.361	7.5499	41.3155	1.10444	1219.77	0.0121766
	G.mar.18_DE.MGSW_ZFMK19029	G.mar.52_ES.PYRS_ZFMK2517202	50.56	6.8078	41.3155	1.10444	1117.03	0.0289193
	G.mar.19_DE.MGSW_ZFMK19031	G.mar.52_ES.PYRS_ZFMK2517202	51.2299	7.054	41.3155	1.10444	1191.79	0.0136986
	G.mar.20_DE.MGSW_ZFMK19044	G.mar.52_ES.PYRS_ZFMK2517202	50.8026	7.2418	41.3155	1.10444	1154.62	0.0152207
	G.mar.21_DE.MGSW_ZFMK19045	G.mar.52_ES.PYRS_ZFMK2517202	51.3589	7.1697	41.3155	1.10444	1208.17	0.0136986
	G.mar.22_DE.MGSW_ZFMK19046	G.mar.52_ES.PYRS_ZFMK2517202	51.2299	7.054	41.3155	1.10444	1191.79	0.0136986
	G.mar.23_DE.MGSW_ZFMK19047	G.mar.52_ES.PYRS_ZFMK2517202	50.714	7.1772	41.3155	1.10444	1143.79	0.0152207
	G.mar.24_DE.MGSW_ZFMK19048	G.mar.52_ES.PYRS_ZFMK2517202	50.6715	7.0469	41.3155	1.10444	1135.5	0.0121766
	G.mar.25_DE.MGSW_ZFMK19049	G.mar.52_ES.PYRS_ZFMK2517202	51.291	7.2522	41.3155	1.10444	1203.77	0.0136986
	G.mar.26_DE.MGSW_ZFMK19051	G.mar.52_ES.PYRS_ZFMK2517202	50.5511	7.1722	41.3155	1.10444	1127.44	0.0289193
	G.mar.27_DE.MGSW_ZFMK19054	G.mar.52_ES.PYRS_ZFMK2517202	50.4647	7.2225	41.3155	1.10444	1120.5	0.0289193
	G.mar.28_DE.MGSW_ZFMK19057	G.mar.52_ES.PYRS_ZFMK2517202	51.361	7.5499	41.3155	1.10444	1219.77	0.0136986
	G.mar.29_DE.MGSW_ZFMK19539	G.mar.52_ES.PYRS_ZFMK2517202	50.6319	6.4731	41.3155	1.10444	1114.48	0.0304414
	G.mar.30_DE.MGSW_ZFMK19550	G.mar.52_ES.PYRS_ZFMK2517202	50.7797	8.0085	41.3155	1.10444	1177.6	0.0136986
	G.mar.31_DE.MGSW_ZFMK19555	G.mar.52_ES.PYRS_ZFMK2517202	50.7797	8.0085	41.3155	1.10444	1177.6	0.0228311
	G.mar.32_DE.MGSW_ZFMK19558	G.mar.52_ES.PYRS_ZFMK2517202	50.7093	7.7132	41.3155	1.10444	1160.71	0.0152207
	G.mar.33_DE.MGSW_ZFMK19560	G.mar.52_ES.PYRS_ZFMK2517202	50.7093	7.7132	41.3155	1.10444	1160.71	0.0136986
	G.mar.34_DE.MGSW_ZFMK19561	G.mar.52_ES.PYRS_ZFMK2517202	50.7093	7.7132	41.3155	1.10444	1160.71	0.0136986
	G.mar.35_DE.MGSW_ZFMK2516208	G.mar.52_ES.PYRS_ZFMK2517202	50.6245	7.1936	41.3155	1.10444	1135.41	0.0152207
	G.mar.36_DE.MGSW_ZFMK2516209	G.mar.52_ES.PYRS_ZFMK2517202	50.6245	7.1936	41.3155	1.10444	1135.41	0.0152207
	G.mar.37_DE.MGSW_ZFMK2557907	G.mar.52_ES.PYRS_ZFMK2517202	51.1821	10.2208	41.3155	1.10444	1298.93	0.00761035
	G.mar.38_DE.MGSW_ZFMK2557908	G.mar.52_ES.PYRS_ZFMK2517202	51.1821	10.2208	41.3155	1.10444	1298.93	0.00761035
	G.mar.39_DE.NDTO_ZFMK100409283	G.mar.52_ES.PYRS_ZFMK2517202	53.9192	10.0977	41.3155	1.10444	1551.29	0.0136986
	G.mar.40_DE.NDTO_ZFMK2538190	G.mar.52_ES.PYRS_ZFMK2517202	54.303	10.756	41.3155	1.10444	1609.58	0.00610687
	G.mar.41_DE.NDTO_ZFMK2538253	G.mar.52_ES.PYRS_ZFMK2517202	53.124	13.884	41.3155	1.10444	1623.37	0.0182927
	G.mar.42_DE.NDTO_ZFMK2553394	G.mar.52_ES.PYRS_ZFMK2517202	53.6525	11.4369	41.3155	1.10444	1571.64	0.00761035
	G.mar.43_DE.NDTO_ZFMK2553395	G.mar.52_ES.PYRS_ZFMK2517202	53.6525	11.4369	41.3155	1.10444	1571.64	0.00761035
	G.mar.44_DE.NDTO_ZFMK2553405	G.mar.52_ES.PYRS_ZFMK2517202	53.2794	12.0768	41.3155	1.10444	1561.72	0.0136986
	G.mar.45_DE.NDTW_ZFMK100409272	G.mar.52_ES.PYRS_ZFMK2517202	52.9604	9.8927	41.3155	1.10444	1452.09	0.0106545
	G.mar.46_DE.NDTW_ZFMK19472	G.mar.52_ES.PYRS_ZFMK2517202	51.4423	7.2665	41.3155	1.10444	1219.41	0.0243902
	G.mar.47_DE.SSL_ZFMK100409123	G.mar.52_ES.PYRS_ZFMK2517202	49.9826	9.7681	41.3155	1.10444	1173.27	0.00761035
	G.mar.48_DE.SSL_ZFMK100409296	G.mar.52_ES.PYRS_ZFMK2517202	49.8641	9.8573	41.3155	1.10444	1166.93	0.00761035
	G.mar.49_ES.CC_ZFMK1861	G.mar.52_ES.PYRS_ZFMK2517202	42.4298	-2.56196	41.3155	1.10444	327.647	0.0121766
	G.mar.50_ES.CC_ZFMK1863	G.mar.52_ES.PYRS_ZFMK2517202	43.2338	-1.63782	41.3155	1.10444	310.266	0.0136986
	G.mar.51_ES.CC_ZFMK1893	G.mar.52_ES.PYRS_ZFMK2517202	43.2338	-1.63782	41.3155	1.10444	310.266	0.0121766
	G.mar.01_DE.MGSO_GBOL33714	G.mar.53_FR.ALP_BGI12GEU183	51.7429	10.7672	45.2731	5.76573	807.301	0.00152207
	G.mar.02_DE.MGSO_ZFMK100409275	G.mar.53_FR.ALP_BGI12GEU183	51.7435	10.7673	45.2731	5.76573	807.362	0.00913242
	G.mar.03_DE.MGSO_ZFMK1634	G.mar.53_FR.ALP_BGI12GEU183	51.841	10.326	45.2731	5.76573	802.844	0.00913242
	G.mar.04_DE.MGSO_ZFMK1909	G.mar.53_FR.ALP_BGI12GEU183	50.8953	11.7527	45.2731	5.76573	766.169	0
	G.mar.05_DE.MGSO_ZFMK19531	G.mar.53_FR.ALP_BGI12GEU183	50.8953	11.7527	45.2731	5.76573	766.169	0
	G.mar.06_DE.MGSO_ZFMK2503693	G.mar.53_FR.ALP_BGI12GEU183	50.9194	11.5479	45.2731	5.76573	759.642	0
	G.mar.07_DE.MGSO_ZFMK2503694	G.mar.53_FR.ALP_BGI12GEU183	50.9194	11.5479	45.2731	5.76573	759.642	0
	G.mar.08_DE.MGSO_ZFMK2542470	G.mar.53_FR.ALP_BGI12GEU183	50.892	11.8209	45.2731	5.76573	768.814	0
	G.mar.09_DE.MGSO_ZFMK2542471	G.mar.53_FR.ALP_BGI12GEU183	50.892	11.8209	45.2731	5.76573	768.814	0.00152207
	G.mar.10_DE.MGSO_ZFMK2542541	G.mar.53_FR.ALP_BGI12GEU183	51.133	11.7487	45.2731	5.76573	787.07	0
	G.mar.11_DE.MGSO_ZFMK2542542	G.mar.53_FR.ALP_BGI12GEU183	51.133	11.7487	45.2731	5.76573	787.07	0
	G.mar.12_DE.MGSW_ZFMK18967	G.mar.53_FR.ALP_BGI12GEU183	50.6627	7.1026	45.2731	5.76573	607.092	0.00913242
	G.mar.13_DE.MGSW_ZFMK18987	G.mar.53_FR.ALP_BGI12GEU183	50.6659	7.2156	45.2731	5.76573	608.87	0.00913242
	G.mar.14_DE.MGSW_ZFMK18988	G.mar.53_FR.ALP_BGI12GEU183	50.6867	7.2997	45.2731	5.76573	612.272	0.0106545
	G.mar.15_DE.MGSW_ZFMK18991	G.mar.53_FR.ALP_BGI12GEU183	50.7667	7.3667	45.2731	5.76573	621.922	0.0106545
	G.mar.16_DE.MGSW_ZFMK19003	G.mar.53_FR.ALP_BGI12GEU183	51.361	7.5499	45.2731	5.76573	689.186	0.0106545
	G.mar.17_DE.MGSW_ZFMK19005	G.mar.53_FR.ALP_BGI12GEU183	51.361	7.5499	45.2731	5.76573	689.186	0.00761035
	G.mar.18_DE.MGSW_ZFMK19029	G.mar.53_FR.ALP_BGI12GEU183	50.56	6.8078	45.2731	5.76573	592.591	0.0304414
	G.mar.19_DE.MGSW_ZFMK19031	G.mar.53_FR.ALP_BGI12GEU183	51.2299	7.054	45.2731	5.76573	668.746	0.0121766
	G.mar.20_DE.MGSW_ZFMK19044	G.mar.53_FR.ALP_BGI12GEU183	50.8026	7.2418	45.2731	5.76573	624.139	0.0106545
	G.mar.21_DE.MGSW_ZFMK19045	G.mar.53_FR.ALP_BGI12GEU183	51.3589	7.1697	45.2731	5.76573	684.159	0.00913242
	G.mar.22_DE.MGSW_ZFMK19046	G.mar.53_FR.ALP_BGI12GEU183	51.2299	7.054	45.2731	5.76573	668.746	0.00913242
	G.mar.23_DE.MGSW_ZFMK19047	G.mar.53_FR.ALP_BGI12GEU183	50.714	7.1772	45.2731	5.76573	613.629	0.0106545
	G.mar.24_DE.MGSW_ZFMK19048	G.mar.53_FR.ALP_BGI12GEU183	50.6715	7.0469	45.2731	5.76573	607.393	0.0106545
	G.mar.25_DE.MGSW_ZFMK19049	G.mar.53_FR.ALP_BGI12GEU183	51.291	7.2522	45.2731	5.76573	677.671	0.00913242
	G.mar.26_DE.MGSW_ZFMK19051	G.mar.53_FR.ALP_BGI12GEU183	50.5511	7.1722	45.2731	5.76573	595.767	0.0304414
	G.mar.27_DE.MGSW_ZFMK19054	G.mar.53_FR.ALP_BGI12GEU183	50.4647	7.2225	45.2731	5.76573	587.013	0.0304414
	G.mar.28_DE.MGSW_ZFMK19057	G.mar.53_FR.ALP_BGI12GEU183	51.361	7.5499	45.2731	5.76573	689.186	0.00913242
	G.mar.29_DE.MGSW_ZFMK19539	G.mar.53_FR.ALP_BGI12GEU183	50.6319	6.4731	45.2731	5.76573	597.809	0.0319635
	G.mar.30_DE.MGSW_ZFMK19550	G.mar.53_FR.ALP_BGI12GEU183	50.7797	8.0085	45.2731	5.76573	634.132	0.00913242
	G.mar.31_DE.MGSW_ZFMK19555	G.mar.53_FR.ALP_BGI12GEU183	50.7797	8.0085	45.2731	5.76573	634.132	0.0182648
	G.mar.32_DE.MGSW_ZFMK19558	G.mar.53_FR.ALP_BGI12GEU183	50.7093	7.7132	45.2731	5.76573	621.154	0.0106545
	G.mar.33_DE.MGSW_ZFMK19560	G.mar.53_FR.ALP_BGI12GEU183	50.7093	7.7132	45.2731	5.76573	621.154	0.00913242
	G.mar.34_DE.MGSW_ZFMK19561	G.mar.53_FR.ALP_BGI12GEU183	50.7093	7.7132	45.2731	5.76573	621.154	0.00913242
	G.mar.35_DE.MGSW_ZFMK2516208	G.mar.53_FR.ALP_BGI12GEU183	50.6245	7.1936	45.2731	5.76573	604.062	0.0136986
	G.mar.36_DE.MGSW_ZFMK2516209	G.mar.53_FR.ALP_BGI12GEU183	50.6245	7.1936	45.2731	5.76573	604.062	0.0136986
	G.mar.37_DE.MGSW_ZFMK2557907	G.mar.53_FR.ALP_BGI12GEU183	51.1821	10.2208	45.2731	5.76573	734.472	0
	G.mar.38_DE.MGSW_ZFMK2557908	G.mar.53_FR.ALP_BGI12GEU183	51.1821	10.2208	45.2731	5.76573	734.472	0
	G.mar.39_DE.NDTO_ZFMK100409283	G.mar.53_FR.ALP_BGI12GEU183	53.9192	10.0977	45.2731	5.76573	1009.71	0.00913242
	G.mar.40_DE.NDTO_ZFMK2538190	G.mar.53_FR.ALP_BGI12GEU183	54.303	10.756	45.2731	5.76573	1064.73	0.00305344
	G.mar.41_DE.NDTO_ZFMK2538253	G.mar.53_FR.ALP_BGI12GEU183	53.124	13.884	45.2731	5.76573	1051.46	0.0152439
	G.mar.42_DE.NDTO_ZFMK2553394	G.mar.53_FR.ALP_BGI12GEU183	53.6525	11.4369	45.2731	5.76573	1016.47	0
	G.mar.43_DE.NDTO_ZFMK2553395	G.mar.53_FR.ALP_BGI12GEU183	53.6525	11.4369	45.2731	5.76573	1016.47	0
	G.mar.44_DE.NDTO_ZFMK2553405	G.mar.53_FR.ALP_BGI12GEU183	53.2794	12.0768	45.2731	5.76573	999.535	0.00913242
	G.mar.45_DE.NDTW_ZFMK100409272	G.mar.53_FR.ALP_BGI12GEU183	52.9604	9.8927	45.2731	5.76573	905.065	0.00913242
	G.mar.46_DE.NDTW_ZFMK19472	G.mar.53_FR.ALP_BGI12GEU183	51.4423	7.2665	45.2731	5.76573	694.407	0.0259146
	G.mar.47_DE.SSL_ZFMK100409123	G.mar.53_FR.ALP_BGI12GEU183	49.9826	9.7681	45.2731	5.76573	602.893	0
	G.mar.48_DE.SSL_ZFMK100409296	G.mar.53_FR.ALP_BGI12GEU183	49.8641	9.8573	45.2731	5.76573	595.09	0
	G.mar.49_ES.CC_ZFMK1861	G.mar.53_FR.ALP_BGI12GEU183	42.4298	-2.56196	45.2731	5.76573	737.883	0.0106545
	G.mar.50_ES.CC_ZFMK1863	G.mar.53_FR.ALP_BGI12GEU183	43.2338	-1.63782	45.2731	5.76573	631.057	0.0121766
	G.mar.51_ES.CC_ZFMK1893	G.mar.53_FR.ALP_BGI12GEU183	43.2338	-1.63782	45.2731	5.76573	631.057	0.0106545
	G.mar.52_ES.PYRS_ZFMK2517202	G.mar.53_FR.ALP_BGI12GEU183	41.3155	1.10444	45.2731	5.76573	579.063	0.00761035
	G.mar.01_DE.MGSO_GBOL33714	G.mar.54_FR.ALP_ZFMK2517217	51.7429	10.7672	45.0707	6.00764	819.95	0.00152207
	G.mar.02_DE.MGSO_ZFMK100409275	G.mar.54_FR.ALP_ZFMK2517217	51.7435	10.7673	45.0707	6.00764	820.013	0.00913242
	G.mar.03_DE.MGSO_ZFMK1634	G.mar.54_FR.ALP_ZFMK2517217	51.841	10.326	45.0707	6.00764	816.533	0.00913242
	G.mar.04_DE.MGSO_ZFMK1909	G.mar.54_FR.ALP_ZFMK2517217	50.8953	11.7527	45.0707	6.00764	775.071	0
	G.mar.05_DE.MGSO_ZFMK19531	G.mar.54_FR.ALP_ZFMK2517217	50.8953	11.7527	45.0707	6.00764	775.071	0
	G.mar.06_DE.MGSO_ZFMK2503693	G.mar.54_FR.ALP_ZFMK2517217	50.9194	11.5479	45.0707	6.00764	769.025	0
	G.mar.07_DE.MGSO_ZFMK2503694	G.mar.54_FR.ALP_ZFMK2517217	50.9194	11.5479	45.0707	6.00764	769.025	0
	G.mar.08_DE.MGSO_ZFMK2542470	G.mar.54_FR.ALP_ZFMK2517217	50.892	11.8209	45.0707	6.00764	777.568	0
	G.mar.09_DE.MGSO_ZFMK2542471	G.mar.54_FR.ALP_ZFMK2517217	50.892	11.8209	45.0707	6.00764	777.568	0.00152207
	G.mar.10_DE.MGSO_ZFMK2542541	G.mar.54_FR.ALP_ZFMK2517217	51.133	11.7487	45.0707	6.00764	796.537	0
	G.mar.11_DE.MGSO_ZFMK2542542	G.mar.54_FR.ALP_ZFMK2517217	51.133	11.7487	45.0707	6.00764	796.537	0
	G.mar.12_DE.MGSW_ZFMK18967	G.mar.54_FR.ALP_ZFMK2517217	50.6627	7.1026	45.0707	6.00764	626.734	0.00913242
	G.mar.13_DE.MGSW_ZFMK18987	G.mar.54_FR.ALP_ZFMK2517217	50.6659	7.2156	45.0707	6.00764	628.233	0.00913242
	G.mar.14_DE.MGSW_ZFMK18988	G.mar.54_FR.ALP_ZFMK2517217	50.6867	7.2997	45.0707	6.00764	631.44	0.0106545
	G.mar.15_DE.MGSW_ZFMK18991	G.mar.54_FR.ALP_ZFMK2517217	50.7667	7.3667	45.0707	6.00764	640.982	0.0106545
	G.mar.16_DE.MGSW_ZFMK19003	G.mar.54_FR.ALP_ZFMK2517217	51.361	7.5499	45.0707	6.00764	708.236	0.0106545
	G.mar.17_DE.MGSW_ZFMK19005	G.mar.54_FR.ALP_ZFMK2517217	51.361	7.5499	45.0707	6.00764	708.236	0.00761035
	G.mar.18_DE.MGSW_ZFMK19029	G.mar.54_FR.ALP_ZFMK2517217	50.56	6.8078	45.0707	6.00764	612.907	0.0304414
	G.mar.19_DE.MGSW_ZFMK19031	G.mar.54_FR.ALP_ZFMK2517217	51.2299	7.054	45.0707	6.00764	688.808	0.0121766
	G.mar.20_DE.MGSW_ZFMK19044	G.mar.54_FR.ALP_ZFMK2517217	50.8026	7.2418	45.0707	6.00764	643.528	0.0106545
	G.mar.21_DE.MGSW_ZFMK19045	G.mar.54_FR.ALP_ZFMK2517217	51.3589	7.1697	45.0707	6.00764	704.033	0.00913242
	G.mar.22_DE.MGSW_ZFMK19046	G.mar.54_FR.ALP_ZFMK2517217	51.2299	7.054	45.0707	6.00764	688.808	0.00913242
	G.mar.23_DE.MGSW_ZFMK19047	G.mar.54_FR.ALP_ZFMK2517217	50.714	7.1772	45.0707	6.00764	633.119	0.0106545
	G.mar.24_DE.MGSW_ZFMK19048	G.mar.54_FR.ALP_ZFMK2517217	50.6715	7.0469	45.0707	6.00764	627.178	0.0106545
	G.mar.25_DE.MGSW_ZFMK19049	G.mar.54_FR.ALP_ZFMK2517217	51.291	7.2522	45.0707	6.00764	697.33	0.00913242
	G.mar.26_DE.MGSW_ZFMK19051	G.mar.54_FR.ALP_ZFMK2517217	50.5511	7.1722	45.0707	6.00764	615.162	0.0304414
	G.mar.27_DE.MGSW_ZFMK19054	G.mar.54_FR.ALP_ZFMK2517217	50.4647	7.2225	45.0707	6.00764	606.218	0.0304414
	G.mar.28_DE.MGSW_ZFMK19057	G.mar.54_FR.ALP_ZFMK2517217	51.361	7.5499	45.0707	6.00764	708.236	0.00913242
	G.mar.29_DE.MGSW_ZFMK19539	G.mar.54_FR.ALP_ZFMK2517217	50.6319	6.4731	45.0707	6.00764	618.963	0.0319635
	G.mar.30_DE.MGSW_ZFMK19550	G.mar.54_FR.ALP_ZFMK2517217	50.7797	8.0085	45.0707	6.00764	651.611	0.00913242
	G.mar.31_DE.MGSW_ZFMK19555	G.mar.54_FR.ALP_ZFMK2517217	50.7797	8.0085	45.0707	6.00764	651.611	0.0182648
	G.mar.32_DE.MGSW_ZFMK19558	G.mar.54_FR.ALP_ZFMK2517217	50.7093	7.7132	45.0707	6.00764	639.304	0.0106545
	G.mar.33_DE.MGSW_ZFMK19560	G.mar.54_FR.ALP_ZFMK2517217	50.7093	7.7132	45.0707	6.00764	639.304	0.00913242
	G.mar.34_DE.MGSW_ZFMK19561	G.mar.54_FR.ALP_ZFMK2517217	50.7093	7.7132	45.0707	6.00764	639.304	0.00913242
	G.mar.35_DE.MGSW_ZFMK2516208	G.mar.54_FR.ALP_ZFMK2517217	50.6245	7.1936	45.0707	6.00764	623.452	0.0136986
	G.mar.36_DE.MGSW_ZFMK2516209	G.mar.54_FR.ALP_ZFMK2517217	50.6245	7.1936	45.0707	6.00764	623.452	0.0136986
	G.mar.37_DE.MGSW_ZFMK2557907	G.mar.54_FR.ALP_ZFMK2517217	51.1821	10.2208	45.0707	6.00764	747.276	0
	G.mar.38_DE.MGSW_ZFMK2557908	G.mar.54_FR.ALP_ZFMK2517217	51.1821	10.2208	45.0707	6.00764	747.276	0
	G.mar.39_DE.NDTO_ZFMK100409283	G.mar.54_FR.ALP_ZFMK2517217	53.9192	10.0977	45.0707	6.00764	1026.21	0.00913242
	G.mar.40_DE.NDTO_ZFMK2538190	G.mar.54_FR.ALP_ZFMK2517217	54.303	10.756	45.0707	6.00764	1080.63	0.00305344
	G.mar.41_DE.NDTO_ZFMK2538253	G.mar.54_FR.ALP_ZFMK2517217	53.124	13.884	45.0707	6.00764	1061.29	0.0152439
	G.mar.42_DE.NDTO_ZFMK2553394	G.mar.54_FR.ALP_ZFMK2517217	53.6525	11.4369	45.0707	6.00764	1030.69	0
	G.mar.43_DE.NDTO_ZFMK2553395	G.mar.54_FR.ALP_ZFMK2517217	53.6525	11.4369	45.0707	6.00764	1030.69	0
	G.mar.44_DE.NDTO_ZFMK2553405	G.mar.54_FR.ALP_ZFMK2517217	53.2794	12.0768	45.0707	6.00764	1012.29	0.00913242
	G.mar.45_DE.NDTW_ZFMK100409272	G.mar.54_FR.ALP_ZFMK2517217	52.9604	9.8927	45.0707	6.00764	920.984	0.00913242
	G.mar.46_DE.NDTW_ZFMK19472	G.mar.54_FR.ALP_ZFMK2517217	51.4423	7.2665	45.0707	6.00764	714.118	0.0259146
	G.mar.47_DE.SSL_ZFMK100409123	G.mar.54_FR.ALP_ZFMK2517217	49.9826	9.7681	45.0707	6.00764	614.266	0
	G.mar.48_DE.SSL_ZFMK100409296	G.mar.54_FR.ALP_ZFMK2517217	49.8641	9.8573	45.0707	6.00764	605.913	0
	G.mar.49_ES.CC_ZFMK1861	G.mar.54_FR.ALP_ZFMK2517217	42.4298	-2.56196	45.0707	6.00764	747.393	0.0106545
	G.mar.50_ES.CC_ZFMK1863	G.mar.54_FR.ALP_ZFMK2517217	43.2338	-1.63782	45.0707	6.00764	642.547	0.0121766
	G.mar.51_ES.CC_ZFMK1893	G.mar.54_FR.ALP_ZFMK2517217	43.2338	-1.63782	45.0707	6.00764	642.547	0.0106545
	G.mar.52_ES.PYRS_ZFMK2517202	G.mar.54_FR.ALP_ZFMK2517217	41.3155	1.10444	45.0707	6.00764	575.919	0.00761035
	G.mar.53_FR.ALP_BGI12GEU183	G.mar.54_FR.ALP_ZFMK2517217	45.2731	5.76573	45.0707	6.00764	29.4166	0
	G.mar.01_DE.MGSO_GBOL33714	G.mar.55_FR.ATLN_ZFMK2553457	51.7429	10.7672	48.2014	0.1711	852.344	0.0121766
	G.mar.02_DE.MGSO_ZFMK100409275	G.mar.55_FR.ATLN_ZFMK2553457	51.7435	10.7673	48.2014	0.1711	852.377	0.00761035
	G.mar.03_DE.MGSO_ZFMK1634	G.mar.55_FR.ATLN_ZFMK2553457	51.841	10.326	48.2014	0.1711	829.173	0.00761035
	G.mar.04_DE.MGSO_ZFMK1909	G.mar.55_FR.ATLN_ZFMK2553457	50.8953	11.7527	48.2014	0.1711	885.91	0.0106545
	G.mar.05_DE.MGSO_ZFMK19531	G.mar.55_FR.ATLN_ZFMK2553457	50.8953	11.7527	48.2014	0.1711	885.91	0.0106545
	G.mar.06_DE.MGSO_ZFMK2503693	G.mar.55_FR.ATLN_ZFMK2553457	50.9194	11.5479	48.2014	0.1711	872.801	0.0106545
	G.mar.07_DE.MGSO_ZFMK2503694	G.mar.55_FR.ATLN_ZFMK2553457	50.9194	11.5479	48.2014	0.1711	872.801	0.0106545
	G.mar.08_DE.MGSO_ZFMK2542470	G.mar.55_FR.ATLN_ZFMK2553457	50.892	11.8209	48.2014	0.1711	890.428	0.0106545
	G.mar.09_DE.MGSO_ZFMK2542471	G.mar.55_FR.ATLN_ZFMK2553457	50.892	11.8209	48.2014	0.1711	890.428	0.0121766
	G.mar.10_DE.MGSO_ZFMK2542541	G.mar.55_FR.ATLN_ZFMK2553457	51.133	11.7487	48.2014	0.1711	892.95	0.0106545
	G.mar.11_DE.MGSO_ZFMK2542542	G.mar.55_FR.ATLN_ZFMK2553457	51.133	11.7487	48.2014	0.1711	892.95	0.0106545
	G.mar.12_DE.MGSW_ZFMK18967	G.mar.55_FR.ATLN_ZFMK2553457	50.6627	7.1026	48.2014	0.1711	570.418	0.00761035
	G.mar.13_DE.MGSW_ZFMK18987	G.mar.55_FR.ATLN_ZFMK2553457	50.6659	7.2156	48.2014	0.1711	577.741	0.00761035
	G.mar.14_DE.MGSW_ZFMK18988	G.mar.55_FR.ATLN_ZFMK2553457	50.6867	7.2997	48.2014	0.1711	584.081	0.00913242
	G.mar.15_DE.MGSW_ZFMK18991	G.mar.55_FR.ATLN_ZFMK2553457	50.7667	7.3667	48.2014	0.1711	592.186	0.00913242
	G.mar.16_DE.MGSW_ZFMK19003	G.mar.55_FR.ATLN_ZFMK2553457	51.361	7.5499	48.2014	0.1711	634.833	0.00913242
	G.mar.17_DE.MGSW_ZFMK19005	G.mar.55_FR.ATLN_ZFMK2553457	51.361	7.5499	48.2014	0.1711	634.833	0.00608828
	G.mar.18_DE.MGSW_ZFMK19029	G.mar.55_FR.ATLN_ZFMK2553457	50.56	6.8078	48.2014	0.1711	546.73	0.0319635
	G.mar.19_DE.MGSW_ZFMK19031	G.mar.55_FR.ATLN_ZFMK2553457	51.2299	7.054	48.2014	0.1711	597.805	0.0136986
	G.mar.20_DE.MGSW_ZFMK19044	G.mar.55_FR.ATLN_ZFMK2553457	50.8026	7.2418	48.2014	0.1711	586.099	0.00913242
	G.mar.21_DE.MGSW_ZFMK19045	G.mar.55_FR.ATLN_ZFMK2553457	51.3589	7.1697	48.2014	0.1711	612.206	0.00761035
	G.mar.22_DE.MGSW_ZFMK19046	G.mar.55_FR.ATLN_ZFMK2553457	51.2299	7.054	48.2014	0.1711	597.805	0.00761035
	G.mar.23_DE.MGSW_ZFMK19047	G.mar.55_FR.ATLN_ZFMK2553457	50.714	7.1772	48.2014	0.1711	577.642	0.00913242
	G.mar.24_DE.MGSW_ZFMK19048	G.mar.55_FR.ATLN_ZFMK2553457	50.6715	7.0469	48.2014	0.1711	567.326	0.00608828
	G.mar.25_DE.MGSW_ZFMK19049	G.mar.55_FR.ATLN_ZFMK2553457	51.291	7.2522	48.2014	0.1711	613.106	0.00761035
	G.mar.26_DE.MGSW_ZFMK19051	G.mar.55_FR.ATLN_ZFMK2553457	50.5511	7.1722	48.2014	0.1711	569.562	0.0319635
	G.mar.27_DE.MGSW_ZFMK19054	G.mar.55_FR.ATLN_ZFMK2553457	50.4647	7.2225	48.2014	0.1711	568.896	0.0319635
	G.mar.28_DE.MGSW_ZFMK19057	G.mar.55_FR.ATLN_ZFMK2553457	51.361	7.5499	48.2014	0.1711	634.833	0.00761035
	G.mar.29_DE.MGSW_ZFMK19539	G.mar.55_FR.ATLN_ZFMK2553457	50.6319	6.4731	48.2014	0.1711	529.369	0.0334855
	G.mar.30_DE.MGSW_ZFMK19550	G.mar.55_FR.ATLN_ZFMK2553457	50.7797	8.0085	48.2014	0.1711	633.704	0.00761035
	G.mar.31_DE.MGSW_ZFMK19555	G.mar.55_FR.ATLN_ZFMK2553457	50.7797	8.0085	48.2014	0.1711	633.704	0.0228311
	G.mar.32_DE.MGSW_ZFMK19558	G.mar.55_FR.ATLN_ZFMK2553457	50.7093	7.7132	48.2014	0.1711	611.553	0.00913242
	G.mar.33_DE.MGSW_ZFMK19560	G.mar.55_FR.ATLN_ZFMK2553457	50.7093	7.7132	48.2014	0.1711	611.553	0.00761035
	G.mar.34_DE.MGSW_ZFMK19561	G.mar.55_FR.ATLN_ZFMK2553457	50.7093	7.7132	48.2014	0.1711	611.553	0.00761035
	G.mar.35_DE.MGSW_ZFMK2516208	G.mar.55_FR.ATLN_ZFMK2553457	50.6245	7.1936	48.2014	0.1711	574.367	0.0152207
	G.mar.36_DE.MGSW_ZFMK2516209	G.mar.55_FR.ATLN_ZFMK2553457	50.6245	7.1936	48.2014	0.1711	574.367	0.0152207
	G.mar.37_DE.MGSW_ZFMK2557907	G.mar.55_FR.ATLN_ZFMK2553457	51.1821	10.2208	48.2014	0.1711	793.881	0.0106545
	G.mar.38_DE.MGSW_ZFMK2557908	G.mar.55_FR.ATLN_ZFMK2553457	51.1821	10.2208	48.2014	0.1711	793.881	0.0106545
	G.mar.39_DE.NDTO_ZFMK100409283	G.mar.55_FR.ATLN_ZFMK2553457	53.9192	10.0977	48.2014	0.1711	938.842	0.00761035
	G.mar.40_DE.NDTO_ZFMK2538190	G.mar.55_FR.ATLN_ZFMK2553457	54.303	10.756	48.2014	0.1711	998.951	0.00458015
	G.mar.41_DE.NDTO_ZFMK2538253	G.mar.55_FR.ATLN_ZFMK2553457	53.124	13.884	48.2014	0.1711	1107.47	0.0152439
	G.mar.42_DE.NDTO_ZFMK2553394	G.mar.55_FR.ATLN_ZFMK2553457	53.6525	11.4369	48.2014	0.1711	992.87	0.0106545
	G.mar.43_DE.NDTO_ZFMK2553395	G.mar.55_FR.ATLN_ZFMK2553457	53.6525	11.4369	48.2014	0.1711	992.87	0.0106545
	G.mar.44_DE.NDTO_ZFMK2553405	G.mar.55_FR.ATLN_ZFMK2553457	53.2794	12.0768	48.2014	0.1711	1007.67	0.00761035
	G.mar.45_DE.NDTW_ZFMK100409272	G.mar.55_FR.ATLN_ZFMK2553457	52.9604	9.8927	48.2014	0.1711	864.932	0.0106545
	G.mar.46_DE.NDTW_ZFMK19472	G.mar.55_FR.ATLN_ZFMK2553457	51.4423	7.2665	48.2014	0.1711	622.838	0.0243902
	G.mar.47_DE.SSL_ZFMK100409123	G.mar.55_FR.ATLN_ZFMK2553457	49.9826	9.7681	48.2014	0.1711	725.296	0.0106545
	G.mar.48_DE.SSL_ZFMK100409296	G.mar.55_FR.ATLN_ZFMK2553457	49.8641	9.8573	48.2014	0.1711	728.908	0.0106545
	G.mar.49_ES.CC_ZFMK1861	G.mar.55_FR.ATLN_ZFMK2553457	42.4298	-2.56196	48.2014	0.1711	675.873	0.0152207
	G.mar.50_ES.CC_ZFMK1863	G.mar.55_FR.ATLN_ZFMK2553457	43.2338	-1.63782	48.2014	0.1711	569.54	0.0167428
	G.mar.51_ES.CC_ZFMK1893	G.mar.55_FR.ATLN_ZFMK2553457	43.2338	-1.63782	48.2014	0.1711	569.54	0.0152207
	G.mar.52_ES.PYRS_ZFMK2517202	G.mar.55_FR.ATLN_ZFMK2553457	41.3155	1.10444	48.2014	0.1711	768.719	0.0121766
	G.mar.53_FR.ALP_BGI12GEU183	G.mar.55_FR.ATLN_ZFMK2553457	45.2731	5.76573	48.2014	0.1711	535.895	0.0106545
	G.mar.54_FR.ALP_ZFMK2517217	G.mar.55_FR.ATLN_ZFMK2553457	45.0707	6.00764	48.2014	0.1711	564.851	0.0106545
	G.mar.01_DE.MGSO_GBOL33714	G.mar.56_FR.ATLN_TW163	51.7429	10.7672	48.2297	-0.2422	876.959	0.0152207
	G.mar.02_DE.MGSO_ZFMK100409275	G.mar.56_FR.ATLN_TW163	51.7435	10.7673	48.2297	-0.2422	876.99	0.0136986
	G.mar.03_DE.MGSO_ZFMK1634	G.mar.56_FR.ATLN_TW163	51.841	10.326	48.2297	-0.2422	853.299	0.0136986
	G.mar.04_DE.MGSO_ZFMK1909	G.mar.56_FR.ATLN_TW163	50.8953	11.7527	48.2297	-0.2422	912.657	0.0136986
	G.mar.05_DE.MGSO_ZFMK19531	G.mar.56_FR.ATLN_TW163	50.8953	11.7527	48.2297	-0.2422	912.657	0.0136986
	G.mar.06_DE.MGSO_ZFMK2503693	G.mar.56_FR.ATLN_TW163	50.9194	11.5479	48.2297	-0.2422	899.439	0.0136986
	G.mar.07_DE.MGSO_ZFMK2503694	G.mar.56_FR.ATLN_TW163	50.9194	11.5479	48.2297	-0.2422	899.439	0.0136986
	G.mar.08_DE.MGSO_ZFMK2542470	G.mar.56_FR.ATLN_TW163	50.892	11.8209	48.2297	-0.2422	917.201	0.0136986
	G.mar.09_DE.MGSO_ZFMK2542471	G.mar.56_FR.ATLN_TW163	50.892	11.8209	48.2297	-0.2422	917.201	0.0152207
	G.mar.10_DE.MGSO_ZFMK2542541	G.mar.56_FR.ATLN_TW163	51.133	11.7487	48.2297	-0.2422	919.255	0.0136986
	G.mar.11_DE.MGSO_ZFMK2542542	G.mar.56_FR.ATLN_TW163	51.133	11.7487	48.2297	-0.2422	919.255	0.0136986
	G.mar.12_DE.MGSW_ZFMK18967	G.mar.56_FR.ATLN_TW163	50.6627	7.1026	48.2297	-0.2422	595.195	0.0136986
	G.mar.13_DE.MGSW_ZFMK18987	G.mar.56_FR.ATLN_TW163	50.6659	7.2156	48.2297	-0.2422	602.611	0.0136986
	G.mar.14_DE.MGSW_ZFMK18988	G.mar.56_FR.ATLN_TW163	50.6867	7.2997	48.2297	-0.2422	608.963	0.0152207
	G.mar.15_DE.MGSW_ZFMK18991	G.mar.56_FR.ATLN_TW163	50.7667	7.3667	48.2297	-0.2422	616.882	0.0152207
	G.mar.16_DE.MGSW_ZFMK19003	G.mar.56_FR.ATLN_TW163	51.361	7.5499	48.2297	-0.2422	657.894	0.0152207
	G.mar.17_DE.MGSW_ZFMK19005	G.mar.56_FR.ATLN_TW163	51.361	7.5499	48.2297	-0.2422	657.894	0.0121766
	G.mar.18_DE.MGSW_ZFMK19029	G.mar.56_FR.ATLN_TW163	50.56	6.8078	48.2297	-0.2422	571.555	0.0197869
	G.mar.19_DE.MGSW_ZFMK19031	G.mar.56_FR.ATLN_TW163	51.2299	7.054	48.2297	-0.2422	620.711	0.0136986
	G.mar.20_DE.MGSW_ZFMK19044	G.mar.56_FR.ATLN_TW163	50.8026	7.2418	48.2297	-0.2422	610.568	0.0152207
	G.mar.21_DE.MGSW_ZFMK19045	G.mar.56_FR.ATLN_TW163	51.3589	7.1697	48.2297	-0.2422	634.838	0.0136986
	G.mar.22_DE.MGSW_ZFMK19046	G.mar.56_FR.ATLN_TW163	51.2299	7.054	48.2297	-0.2422	620.711	0.0136986
	G.mar.23_DE.MGSW_ZFMK19047	G.mar.56_FR.ATLN_TW163	50.714	7.1772	48.2297	-0.2422	602.327	0.0152207
	G.mar.24_DE.MGSW_ZFMK19048	G.mar.56_FR.ATLN_TW163	50.6715	7.0469	48.2297	-0.2422	592.022	0.0121766
	G.mar.25_DE.MGSW_ZFMK19049	G.mar.56_FR.ATLN_TW163	51.291	7.2522	48.2297	-0.2422	636.051	0.0136986
	G.mar.26_DE.MGSW_ZFMK19051	G.mar.56_FR.ATLN_TW163	50.5511	7.1722	48.2297	-0.2422	594.75	0.0197869
	G.mar.27_DE.MGSW_ZFMK19054	G.mar.56_FR.ATLN_TW163	50.4647	7.2225	48.2297	-0.2422	594.39	0.0197869
	G.mar.28_DE.MGSW_ZFMK19057	G.mar.56_FR.ATLN_TW163	51.361	7.5499	48.2297	-0.2422	657.894	0.0136986
	G.mar.29_DE.MGSW_ZFMK19539	G.mar.56_FR.ATLN_TW163	50.6319	6.4731	48.2297	-0.2422	553.599	0.021309
	G.mar.30_DE.MGSW_ZFMK19550	G.mar.56_FR.ATLN_TW163	50.7797	8.0085	48.2297	-0.2422	658.893	0.0136986
	G.mar.31_DE.MGSW_ZFMK19555	G.mar.56_FR.ATLN_TW163	50.7797	8.0085	48.2297	-0.2422	658.893	0.0197869
	G.mar.32_DE.MGSW_ZFMK19558	G.mar.56_FR.ATLN_TW163	50.7093	7.7132	48.2297	-0.2422	636.714	0.0152207
	G.mar.33_DE.MGSW_ZFMK19560	G.mar.56_FR.ATLN_TW163	50.7093	7.7132	48.2297	-0.2422	636.714	0.0136986
	G.mar.34_DE.MGSW_ZFMK19561	G.mar.56_FR.ATLN_TW163	50.7093	7.7132	48.2297	-0.2422	636.714	0.0136986
	G.mar.35_DE.MGSW_ZFMK2516208	G.mar.56_FR.ATLN_TW163	50.6245	7.1936	48.2297	-0.2422	599.346	0.0152207
	G.mar.36_DE.MGSW_ZFMK2516209	G.mar.56_FR.ATLN_TW163	50.6245	7.1936	48.2297	-0.2422	599.346	0.0152207
	G.mar.37_DE.MGSW_ZFMK2557907	G.mar.56_FR.ATLN_TW163	51.1821	10.2208	48.2297	-0.2422	819.439	0.0136986
	G.mar.38_DE.MGSW_ZFMK2557908	G.mar.56_FR.ATLN_TW163	51.1821	10.2208	48.2297	-0.2422	819.439	0.0136986
	G.mar.39_DE.NDTO_ZFMK100409283	G.mar.56_FR.ATLN_TW163	53.9192	10.0977	48.2297	-0.2422	957.957	0.0136986
	G.mar.40_DE.NDTO_ZFMK2538190	G.mar.56_FR.ATLN_TW163	54.303	10.756	48.2297	-0.2422	1017.88	0.00763359
	G.mar.41_DE.NDTO_ZFMK2538253	G.mar.56_FR.ATLN_TW163	53.124	13.884	48.2297	-0.2422	1130.95	0.0213415
	G.mar.42_DE.NDTO_ZFMK2553394	G.mar.56_FR.ATLN_TW163	53.6525	11.4369	48.2297	-0.2422	1013.78	0.0136986
	G.mar.43_DE.NDTO_ZFMK2553395	G.mar.56_FR.ATLN_TW163	53.6525	11.4369	48.2297	-0.2422	1013.78	0.0136986
	G.mar.44_DE.NDTO_ZFMK2553405	G.mar.56_FR.ATLN_TW163	53.2794	12.0768	48.2297	-0.2422	1029.83	0.0136986
	G.mar.45_DE.NDTW_ZFMK100409272	G.mar.56_FR.ATLN_TW163	52.9604	9.8927	48.2297	-0.2422	886.067	0.0152207
	G.mar.46_DE.NDTW_ZFMK19472	G.mar.56_FR.ATLN_TW163	51.4423	7.2665	48.2297	-0.2422	645.323	0.0152439
	G.mar.47_DE.SSL_ZFMK100409123	G.mar.56_FR.ATLN_TW163	49.9826	9.7681	48.2297	-0.2422	753.193	0.0136986
	G.mar.48_DE.SSL_ZFMK100409296	G.mar.56_FR.ATLN_TW163	49.8641	9.8573	48.2297	-0.2422	757.048	0.0136986
	G.mar.49_ES.CC_ZFMK1861	G.mar.56_FR.ATLN_TW163	42.4298	-2.56196	48.2297	-0.2422	669.421	0.0152207
	G.mar.50_ES.CC_ZFMK1863	G.mar.56_FR.ATLN_TW163	43.2338	-1.63782	48.2297	-0.2422	565.597	0.0167428
	G.mar.51_ES.CC_ZFMK1893	G.mar.56_FR.ATLN_TW163	43.2338	-1.63782	48.2297	-0.2422	565.597	0.0152207
	G.mar.52_ES.PYRS_ZFMK2517202	G.mar.56_FR.ATLN_TW163	41.3155	1.10444	48.2297	-0.2422	775.619	0.0152207
	G.mar.53_FR.ALP_BGI12GEU183	G.mar.56_FR.ATLN_TW163	45.2731	5.76573	48.2297	-0.2422	562.928	0.0136986
	G.mar.54_FR.ALP_ZFMK2517217	G.mar.56_FR.ATLN_TW163	45.0707	6.00764	48.2297	-0.2422	591.738	0.0136986
	G.mar.55_FR.ATLN_ZFMK2553457	G.mar.56_FR.ATLN_TW163	48.2014	0.1711	48.2297	-0.2422	30.7643	0.0121766
	G.mar.01_DE.MGSO_GBOL33714	G.mar.57_FR.ATLN_TW164	51.7429	10.7672	47.2611	0.3256	901.929	0.0152207
	G.mar.02_DE.MGSO_ZFMK100409275	G.mar.57_FR.ATLN_TW164	51.7435	10.7673	47.2611	0.3256	901.968	0.0197869
	G.mar.03_DE.MGSO_ZFMK1634	G.mar.57_FR.ATLN_TW164	51.841	10.326	47.2611	0.3256	881.274	0.0197869
	G.mar.04_DE.MGSO_ZFMK1909	G.mar.57_FR.ATLN_TW164	50.8953	11.7527	47.2611	0.3256	923.301	0.0136986
	G.mar.05_DE.MGSO_ZFMK19531	G.mar.57_FR.ATLN_TW164	50.8953	11.7527	47.2611	0.3256	923.301	0.0136986
	G.mar.06_DE.MGSO_ZFMK2503693	G.mar.57_FR.ATLN_TW164	50.9194	11.5479	47.2611	0.3256	910.973	0.0136986
	G.mar.07_DE.MGSO_ZFMK2503694	G.mar.57_FR.ATLN_TW164	50.9194	11.5479	47.2611	0.3256	910.973	0.0136986
	G.mar.08_DE.MGSO_ZFMK2542470	G.mar.57_FR.ATLN_TW164	50.892	11.8209	47.2611	0.3256	927.618	0.0136986
	G.mar.09_DE.MGSO_ZFMK2542471	G.mar.57_FR.ATLN_TW164	50.892	11.8209	47.2611	0.3256	927.618	0.0152207
	G.mar.10_DE.MGSO_ZFMK2542541	G.mar.57_FR.ATLN_TW164	51.133	11.7487	47.2611	0.3256	933.044	0.0136986
	G.mar.11_DE.MGSO_ZFMK2542542	G.mar.57_FR.ATLN_TW164	51.133	11.7487	47.2611	0.3256	933.044	0.0136986
	G.mar.12_DE.MGSW_ZFMK18967	G.mar.57_FR.ATLN_TW164	50.6627	7.1026	47.2611	0.3256	621.974	0.0197869
	G.mar.13_DE.MGSW_ZFMK18987	G.mar.57_FR.ATLN_TW164	50.6659	7.2156	47.2611	0.3256	628.73	0.0197869
	G.mar.14_DE.MGSW_ZFMK18988	G.mar.57_FR.ATLN_TW164	50.6867	7.2997	47.2611	0.3256	634.927	0.021309
	G.mar.15_DE.MGSW_ZFMK18991	G.mar.57_FR.ATLN_TW164	50.7667	7.3667	47.2611	0.3256	643.831	0.021309
	G.mar.16_DE.MGSW_ZFMK19003	G.mar.57_FR.ATLN_TW164	51.361	7.5499	47.2611	0.3256	693.331	0.021309
	G.mar.17_DE.MGSW_ZFMK19005	G.mar.57_FR.ATLN_TW164	51.361	7.5499	47.2611	0.3256	693.331	0.0182648
	G.mar.18_DE.MGSW_ZFMK19029	G.mar.57_FR.ATLN_TW164	50.56	6.8078	47.2611	0.3256	598.401	0.0319635
	G.mar.19_DE.MGSW_ZFMK19031	G.mar.57_FR.ATLN_TW164	51.2299	7.054	47.2611	0.3256	657.361	0.0167428
	G.mar.20_DE.MGSW_ZFMK19044	G.mar.57_FR.ATLN_TW164	50.8026	7.2418	47.2611	0.3256	638.92	0.021309
	G.mar.21_DE.MGSW_ZFMK19045	G.mar.57_FR.ATLN_TW164	51.3589	7.1697	47.2611	0.3256	672.706	0.0197869
	G.mar.22_DE.MGSW_ZFMK19046	G.mar.57_FR.ATLN_TW164	51.2299	7.054	47.2611	0.3256	657.361	0.0197869
	G.mar.23_DE.MGSW_ZFMK19047	G.mar.57_FR.ATLN_TW164	50.714	7.1772	47.2611	0.3256	629.541	0.021309
	G.mar.24_DE.MGSW_ZFMK19048	G.mar.57_FR.ATLN_TW164	50.6715	7.0469	47.2611	0.3256	619.319	0.0182648
	G.mar.25_DE.MGSW_ZFMK19049	G.mar.57_FR.ATLN_TW164	51.291	7.2522	47.2611	0.3256	672.328	0.0197869
	G.mar.26_DE.MGSW_ZFMK19051	G.mar.57_FR.ATLN_TW164	50.5511	7.1722	47.2611	0.3256	619.068	0.0319635
	G.mar.27_DE.MGSW_ZFMK19054	G.mar.57_FR.ATLN_TW164	50.4647	7.2225	47.2611	0.3256	616.808	0.0319635
	G.mar.28_DE.MGSW_ZFMK19057	G.mar.57_FR.ATLN_TW164	51.361	7.5499	47.2611	0.3256	693.331	0.0197869
	G.mar.29_DE.MGSW_ZFMK19539	G.mar.57_FR.ATLN_TW164	50.6319	6.4731	47.2611	0.3256	584.133	0.0334855
	G.mar.30_DE.MGSW_ZFMK19550	G.mar.57_FR.ATLN_TW164	50.7797	8.0085	47.2611	0.3256	682.351	0.0197869
	G.mar.31_DE.MGSW_ZFMK19555	G.mar.57_FR.ATLN_TW164	50.7797	8.0085	47.2611	0.3256	682.351	0.0289193
	G.mar.32_DE.MGSW_ZFMK19558	G.mar.57_FR.ATLN_TW164	50.7093	7.7132	47.2611	0.3256	660.618	0.021309
	G.mar.33_DE.MGSW_ZFMK19560	G.mar.57_FR.ATLN_TW164	50.7093	7.7132	47.2611	0.3256	660.618	0.0197869
	G.mar.34_DE.MGSW_ZFMK19561	G.mar.57_FR.ATLN_TW164	50.7093	7.7132	47.2611	0.3256	660.618	0.0197869
	G.mar.35_DE.MGSW_ZFMK2516208	G.mar.57_FR.ATLN_TW164	50.6245	7.1936	47.2611	0.3256	624.862	0.0152207
	G.mar.36_DE.MGSW_ZFMK2516209	G.mar.57_FR.ATLN_TW164	50.6245	7.1936	47.2611	0.3256	624.862	0.0152207
	G.mar.37_DE.MGSW_ZFMK2557907	G.mar.57_FR.ATLN_TW164	51.1821	10.2208	47.2611	0.3256	838.989	0.0136986
	G.mar.38_DE.MGSW_ZFMK2557908	G.mar.57_FR.ATLN_TW164	51.1821	10.2208	47.2611	0.3256	838.989	0.0136986
	G.mar.39_DE.NDTO_ZFMK100409283	G.mar.57_FR.ATLN_TW164	53.9192	10.0977	47.2611	0.3256	1009.51	0.0197869
	G.mar.40_DE.NDTO_ZFMK2538190	G.mar.57_FR.ATLN_TW164	54.303	10.756	47.2611	0.3256	1069.96	0.0122137
	G.mar.41_DE.NDTO_ZFMK2538253	G.mar.57_FR.ATLN_TW164	53.124	13.884	47.2611	0.3256	1161.04	0.0243902
	G.mar.42_DE.NDTO_ZFMK2553394	G.mar.57_FR.ATLN_TW164	53.6525	11.4369	47.2611	0.3256	1057.26	0.0136986
	G.mar.43_DE.NDTO_ZFMK2553395	G.mar.57_FR.ATLN_TW164	53.6525	11.4369	47.2611	0.3256	1057.26	0.0136986
	G.mar.44_DE.NDTO_ZFMK2553405	G.mar.57_FR.ATLN_TW164	53.2794	12.0768	47.2611	0.3256	1067.27	0.0197869
	G.mar.45_DE.NDTW_ZFMK100409272	G.mar.57_FR.ATLN_TW164	52.9604	9.8927	47.2611	0.3256	929.14	0.0167428
	G.mar.46_DE.NDTW_ZFMK19472	G.mar.57_FR.ATLN_TW164	51.4423	7.2665	47.2611	0.3256	683.804	0.027439
	G.mar.47_DE.SSL_ZFMK100409123	G.mar.57_FR.ATLN_TW164	49.9826	9.7681	47.2611	0.3256	755.982	0.0136986
	G.mar.48_DE.SSL_ZFMK100409296	G.mar.57_FR.ATLN_TW164	49.8641	9.8573	47.2611	0.3256	757.632	0.0136986
	G.mar.49_ES.CC_ZFMK1861	G.mar.57_FR.ATLN_TW164	42.4298	-2.56196	47.2611	0.3256	582.984	0.0121766
	G.mar.50_ES.CC_ZFMK1863	G.mar.57_FR.ATLN_TW164	43.2338	-1.63782	47.2611	0.3256	473.119	0.0136986
	G.mar.51_ES.CC_ZFMK1893	G.mar.57_FR.ATLN_TW164	43.2338	-1.63782	47.2611	0.3256	473.119	0.0121766
	G.mar.52_ES.PYRS_ZFMK2517202	G.mar.57_FR.ATLN_TW164	41.3155	1.10444	47.2611	0.3256	663.597	0.0121766
	G.mar.53_FR.ALP_BGI12GEU183	G.mar.57_FR.ATLN_TW164	45.2731	5.76573	47.2611	0.3256	472.558	0.0136986
	G.mar.54_FR.ALP_ZFMK2517217	G.mar.57_FR.ATLN_TW164	45.0707	6.00764	47.2611	0.3256	500.302	0.0136986
	G.mar.55_FR.ATLN_ZFMK2553457	G.mar.57_FR.ATLN_TW164	48.2014	0.1711	47.2611	0.3256	105.127	0.0182648
	G.mar.56_FR.ATLN_TW163	G.mar.57_FR.ATLN_TW164	48.2297	-0.2422	47.2611	0.3256	115.695	0.0182648
	G.mar.01_DE.MGSO_GBOL33714	G.mar.58_FR.CONN_ZFMK100410157	51.7429	10.7672	47.8123	7.0651	511.079	0.00761035
	G.mar.02_DE.MGSO_ZFMK100409275	G.mar.58_FR.CONN_ZFMK100410157	51.7435	10.7673	47.8123	7.0651	511.139	0.00913242
	G.mar.03_DE.MGSO_ZFMK1634	G.mar.58_FR.CONN_ZFMK100410157	51.841	10.326	47.8123	7.0651	504.922	0.00913242
	G.mar.04_DE.MGSO_ZFMK1909	G.mar.58_FR.CONN_ZFMK100410157	50.8953	11.7527	47.8123	7.0651	482.006	0.00608828
	G.mar.05_DE.MGSO_ZFMK19531	G.mar.58_FR.CONN_ZFMK100410157	50.8953	11.7527	47.8123	7.0651	482.006	0.00608828
	G.mar.06_DE.MGSO_ZFMK2503693	G.mar.58_FR.CONN_ZFMK100410157	50.9194	11.5479	47.8123	7.0651	473.599	0.00608828
	G.mar.07_DE.MGSO_ZFMK2503694	G.mar.58_FR.CONN_ZFMK100410157	50.9194	11.5479	47.8123	7.0651	473.599	0.00608828
	G.mar.08_DE.MGSO_ZFMK2542470	G.mar.58_FR.CONN_ZFMK100410157	50.892	11.8209	47.8123	7.0651	485.237	0.00608828
	G.mar.09_DE.MGSO_ZFMK2542471	G.mar.58_FR.CONN_ZFMK100410157	50.892	11.8209	47.8123	7.0651	485.237	0.00761035
	G.mar.10_DE.MGSO_ZFMK2542541	G.mar.58_FR.CONN_ZFMK100410157	51.133	11.7487	47.8123	7.0651	500.352	0.00608828
	G.mar.11_DE.MGSO_ZFMK2542542	G.mar.58_FR.CONN_ZFMK100410157	51.133	11.7487	47.8123	7.0651	500.352	0.00608828
	G.mar.12_DE.MGSW_ZFMK18967	G.mar.58_FR.CONN_ZFMK100410157	50.6627	7.1026	47.8123	7.0651	316.763	0.00913242
	G.mar.13_DE.MGSW_ZFMK18987	G.mar.58_FR.CONN_ZFMK100410157	50.6659	7.2156	47.8123	7.0651	317.294	0.00913242
	G.mar.14_DE.MGSW_ZFMK18988	G.mar.58_FR.CONN_ZFMK100410157	50.6867	7.2997	47.8123	7.0651	319.871	0.0106545
	G.mar.15_DE.MGSW_ZFMK18991	G.mar.58_FR.CONN_ZFMK100410157	50.7667	7.3667	47.8123	7.0651	329.034	0.0106545
	G.mar.16_DE.MGSW_ZFMK19003	G.mar.58_FR.CONN_ZFMK100410157	51.361	7.5499	47.8123	7.0651	395.891	0.0106545
	G.mar.17_DE.MGSW_ZFMK19005	G.mar.58_FR.CONN_ZFMK100410157	51.361	7.5499	47.8123	7.0651	395.891	0.00761035
	G.mar.18_DE.MGSW_ZFMK19029	G.mar.58_FR.CONN_ZFMK100410157	50.56	6.8078	47.8123	7.0651	305.909	0.0289193
	G.mar.19_DE.MGSW_ZFMK19031	G.mar.58_FR.CONN_ZFMK100410157	51.2299	7.054	47.8123	7.0651	379.782	0.0121766
	G.mar.20_DE.MGSW_ZFMK19044	G.mar.58_FR.CONN_ZFMK100410157	50.8026	7.2418	47.8123	7.0651	332.544	0.0106545
	G.mar.21_DE.MGSW_ZFMK19045	G.mar.58_FR.CONN_ZFMK100410157	51.3589	7.1697	47.8123	7.0651	394.188	0.00913242
	G.mar.22_DE.MGSW_ZFMK19046	G.mar.58_FR.CONN_ZFMK100410157	51.2299	7.054	47.8123	7.0651	379.782	0.00913242
	G.mar.23_DE.MGSW_ZFMK19047	G.mar.58_FR.CONN_ZFMK100410157	50.714	7.1772	47.8123	7.0651	322.554	0.0106545
	G.mar.24_DE.MGSW_ZFMK19048	G.mar.58_FR.CONN_ZFMK100410157	50.6715	7.0469	47.8123	7.0651	317.732	0.00761035
	G.mar.25_DE.MGSW_ZFMK19049	G.mar.58_FR.CONN_ZFMK100410157	51.291	7.2522	47.8123	7.0651	386.806	0.00913242
	G.mar.26_DE.MGSW_ZFMK19051	G.mar.58_FR.CONN_ZFMK100410157	50.5511	7.1722	47.8123	7.0651	304.449	0.0289193
	G.mar.27_DE.MGSW_ZFMK19054	G.mar.58_FR.CONN_ZFMK100410157	50.4647	7.2225	47.8123	7.0651	294.97	0.0289193
	G.mar.28_DE.MGSW_ZFMK19057	G.mar.58_FR.CONN_ZFMK100410157	51.361	7.5499	47.8123	7.0651	395.891	0.00913242
	G.mar.29_DE.MGSW_ZFMK19539	G.mar.58_FR.CONN_ZFMK100410157	50.6319	6.4731	47.8123	7.0651	316.258	0.0304414
	G.mar.30_DE.MGSW_ZFMK19550	G.mar.58_FR.CONN_ZFMK100410157	50.7797	8.0085	47.8123	7.0651	336.758	0.00913242
	G.mar.31_DE.MGSW_ZFMK19555	G.mar.58_FR.CONN_ZFMK100410157	50.7797	8.0085	47.8123	7.0651	336.758	0.021309
	G.mar.32_DE.MGSW_ZFMK19558	G.mar.58_FR.CONN_ZFMK100410157	50.7093	7.7132	47.8123	7.0651	325.339	0.0106545
	G.mar.33_DE.MGSW_ZFMK19560	G.mar.58_FR.CONN_ZFMK100410157	50.7093	7.7132	47.8123	7.0651	325.339	0.00913242
	G.mar.34_DE.MGSW_ZFMK19561	G.mar.58_FR.CONN_ZFMK100410157	50.7093	7.7132	47.8123	7.0651	325.339	0.00913242
	G.mar.35_DE.MGSW_ZFMK2516208	G.mar.58_FR.CONN_ZFMK100410157	50.6245	7.1936	47.8123	7.0651	312.645	0.0136986
	G.mar.36_DE.MGSW_ZFMK2516209	G.mar.58_FR.CONN_ZFMK100410157	50.6245	7.1936	47.8123	7.0651	312.645	0.0136986
	G.mar.37_DE.MGSW_ZFMK2557907	G.mar.58_FR.CONN_ZFMK100410157	51.1821	10.2208	47.8123	7.0651	438.198	0.00608828
	G.mar.38_DE.MGSW_ZFMK2557908	G.mar.58_FR.CONN_ZFMK100410157	51.1821	10.2208	47.8123	7.0651	438.198	0.00608828
	G.mar.39_DE.NDTO_ZFMK100409283	G.mar.58_FR.CONN_ZFMK100410157	53.9192	10.0977	47.8123	7.0651	711.009	0.00913242
	G.mar.40_DE.NDTO_ZFMK2538190	G.mar.58_FR.CONN_ZFMK100410157	54.303	10.756	47.8123	7.0651	765.697	0.00458015
	G.mar.41_DE.NDTO_ZFMK2538253	G.mar.58_FR.CONN_ZFMK100410157	53.124	13.884	47.8123	7.0651	761.56	0.0137195
	G.mar.42_DE.NDTO_ZFMK2553394	G.mar.58_FR.CONN_ZFMK100410157	53.6525	11.4369	47.8123	7.0651	717.821	0.00608828
	G.mar.43_DE.NDTO_ZFMK2553395	G.mar.58_FR.CONN_ZFMK100410157	53.6525	11.4369	47.8123	7.0651	717.821	0.00608828
	G.mar.44_DE.NDTO_ZFMK2553405	G.mar.58_FR.CONN_ZFMK100410157	53.2794	12.0768	47.8123	7.0651	702.695	0.00913242
	G.mar.45_DE.NDTW_ZFMK100409272	G.mar.58_FR.CONN_ZFMK100410157	52.9604	9.8927	47.8123	7.0651	606.026	0.00304414
	G.mar.46_DE.NDTW_ZFMK19472	G.mar.58_FR.CONN_ZFMK100410157	51.4423	7.2665	47.8123	7.0651	403.644	0.0243902
	G.mar.47_DE.SSL_ZFMK100409123	G.mar.58_FR.CONN_ZFMK100410157	49.9826	9.7681	47.8123	7.0651	311.659	0.00608828
	G.mar.48_DE.SSL_ZFMK100409296	G.mar.58_FR.CONN_ZFMK100410157	49.8641	9.8573	47.8123	7.0651	306.052	0.00608828
	G.mar.49_ES.CC_ZFMK1861	G.mar.58_FR.CONN_ZFMK100410157	42.4298	-2.56196	47.8123	7.0651	961.886	0.0106545
	G.mar.50_ES.CC_ZFMK1863	G.mar.58_FR.CONN_ZFMK100410157	43.2338	-1.63782	47.8123	7.0651	846.477	0.0121766
	G.mar.51_ES.CC_ZFMK1893	G.mar.58_FR.CONN_ZFMK100410157	43.2338	-1.63782	47.8123	7.0651	846.477	0.0106545
	G.mar.52_ES.PYRS_ZFMK2517202	G.mar.58_FR.CONN_ZFMK100410157	41.3155	1.10444	47.8123	7.0651	861.921	0.00761035
	G.mar.53_FR.ALP_BGI12GEU183	G.mar.58_FR.CONN_ZFMK100410157	45.2731	5.76573	47.8123	7.0651	299.122	0.00608828
	G.mar.54_FR.ALP_ZFMK2517217	G.mar.58_FR.CONN_ZFMK100410157	45.0707	6.00764	47.8123	7.0651	315.233	0.00608828
	G.mar.55_FR.ATLN_ZFMK2553457	G.mar.58_FR.CONN_ZFMK100410157	48.2014	0.1711	47.8123	7.0651	514.196	0.00761035
	G.mar.56_FR.ATLN_TW163	G.mar.58_FR.CONN_ZFMK100410157	48.2297	-0.2422	47.8123	7.0651	544.898	0.0121766
	G.mar.57_FR.ATLN_TW164	G.mar.58_FR.CONN_ZFMK100410157	47.2611	0.3256	47.8123	7.0651	509.145	0.0136986
	G.mar.01_DE.MGSO_GBOL33714	G.mar.59_FR.CONN_ZFMK18996	51.7429	10.7672	49.4611	6.36444	400.784	0.00761035
	G.mar.02_DE.MGSO_ZFMK100409275	G.mar.59_FR.CONN_ZFMK18996	51.7435	10.7673	49.4611	6.36444	400.83	0.00913242
	G.mar.03_DE.MGSO_ZFMK1634	G.mar.59_FR.CONN_ZFMK18996	51.841	10.326	49.4611	6.36444	384.411	0.00913242
	G.mar.04_DE.MGSO_ZFMK1909	G.mar.59_FR.CONN_ZFMK18996	50.8953	11.7527	49.4611	6.36444	415.129	0.00608828
	G.mar.05_DE.MGSO_ZFMK19531	G.mar.59_FR.CONN_ZFMK18996	50.8953	11.7527	49.4611	6.36444	415.129	0.00608828
	G.mar.06_DE.MGSO_ZFMK2503693	G.mar.59_FR.CONN_ZFMK18996	50.9194	11.5479	49.4611	6.36444	402.704	0.00608828
	G.mar.07_DE.MGSO_ZFMK2503694	G.mar.59_FR.CONN_ZFMK18996	50.9194	11.5479	49.4611	6.36444	402.704	0.00608828
	G.mar.08_DE.MGSO_ZFMK2542470	G.mar.59_FR.CONN_ZFMK18996	50.892	11.8209	49.4611	6.36444	419.485	0.00608828
	G.mar.09_DE.MGSO_ZFMK2542471	G.mar.59_FR.CONN_ZFMK18996	50.892	11.8209	49.4611	6.36444	419.485	0.00761035
	G.mar.10_DE.MGSO_ZFMK2542541	G.mar.59_FR.CONN_ZFMK18996	51.133	11.7487	49.4611	6.36444	424.837	0.00608828
	G.mar.11_DE.MGSO_ZFMK2542542	G.mar.59_FR.CONN_ZFMK18996	51.133	11.7487	49.4611	6.36444	424.837	0.00608828
	G.mar.12_DE.MGSW_ZFMK18967	G.mar.59_FR.CONN_ZFMK18996	50.6627	7.1026	49.4611	6.36444	143.533	0.00913242
	G.mar.13_DE.MGSW_ZFMK18987	G.mar.59_FR.CONN_ZFMK18996	50.6659	7.2156	49.4611	6.36444	147.005	0.00913242
	G.mar.14_DE.MGSW_ZFMK18988	G.mar.59_FR.CONN_ZFMK18996	50.6867	7.2997	49.4611	6.36444	151.648	0.0106545
	G.mar.15_DE.MGSW_ZFMK18991	G.mar.59_FR.CONN_ZFMK18996	50.7667	7.3667	49.4611	6.36444	161.707	0.0106545
	G.mar.16_DE.MGSW_ZFMK19003	G.mar.59_FR.CONN_ZFMK18996	51.361	7.5499	49.4611	6.36444	227.196	0.0106545
	G.mar.17_DE.MGSW_ZFMK19005	G.mar.59_FR.CONN_ZFMK18996	51.361	7.5499	49.4611	6.36444	227.196	0.00761035
	G.mar.18_DE.MGSW_ZFMK19029	G.mar.59_FR.CONN_ZFMK18996	50.56	6.8078	49.4611	6.36444	126.151	0.0289193
	G.mar.19_DE.MGSW_ZFMK19031	G.mar.59_FR.CONN_ZFMK18996	51.2299	7.054	49.4611	6.36444	202.546	0.0121766
	G.mar.20_DE.MGSW_ZFMK19044	G.mar.59_FR.CONN_ZFMK18996	50.8026	7.2418	49.4611	6.36444	161.641	0.0106545
	G.mar.21_DE.MGSW_ZFMK19045	G.mar.59_FR.CONN_ZFMK18996	51.3589	7.1697	49.4611	6.36444	218.463	0.00913242
	G.mar.22_DE.MGSW_ZFMK19046	G.mar.59_FR.CONN_ZFMK18996	51.2299	7.054	49.4611	6.36444	202.546	0.00913242
	G.mar.23_DE.MGSW_ZFMK19047	G.mar.59_FR.CONN_ZFMK18996	50.714	7.1772	49.4611	6.36444	150.803	0.0106545
	G.mar.24_DE.MGSW_ZFMK19048	G.mar.59_FR.CONN_ZFMK18996	50.6715	7.0469	49.4611	6.36444	143.041	0.00761035
	G.mar.25_DE.MGSW_ZFMK19049	G.mar.59_FR.CONN_ZFMK18996	51.291	7.2522	49.4611	6.36444	212.853	0.00913242
	G.mar.26_DE.MGSW_ZFMK19051	G.mar.59_FR.CONN_ZFMK18996	50.5511	7.1722	49.4611	6.36444	134.16	0.0289193
	G.mar.27_DE.MGSW_ZFMK19054	G.mar.59_FR.CONN_ZFMK18996	50.4647	7.2225	49.4611	6.36444	127.277	0.0289193
	G.mar.28_DE.MGSW_ZFMK19057	G.mar.59_FR.CONN_ZFMK18996	51.361	7.5499	49.4611	6.36444	227.196	0.00913242
	G.mar.29_DE.MGSW_ZFMK19539	G.mar.59_FR.CONN_ZFMK18996	50.6319	6.4731	49.4611	6.36444	130.335	0.0304414
	G.mar.30_DE.MGSW_ZFMK19550	G.mar.59_FR.CONN_ZFMK18996	50.7797	8.0085	49.4611	6.36444	187.586	0.00913242
	G.mar.31_DE.MGSW_ZFMK19555	G.mar.59_FR.CONN_ZFMK18996	50.7797	8.0085	49.4611	6.36444	187.586	0.021309
	G.mar.32_DE.MGSW_ZFMK19558	G.mar.59_FR.CONN_ZFMK18996	50.7093	7.7132	49.4611	6.36444	168.777	0.0106545
	G.mar.33_DE.MGSW_ZFMK19560	G.mar.59_FR.CONN_ZFMK18996	50.7093	7.7132	49.4611	6.36444	168.777	0.00913242
	G.mar.34_DE.MGSW_ZFMK19561	G.mar.59_FR.CONN_ZFMK18996	50.7093	7.7132	49.4611	6.36444	168.777	0.00913242
	G.mar.35_DE.MGSW_ZFMK2516208	G.mar.59_FR.CONN_ZFMK18996	50.6245	7.1936	49.4611	6.36444	142.178	0.0136986
	G.mar.36_DE.MGSW_ZFMK2516209	G.mar.59_FR.CONN_ZFMK18996	50.6245	7.1936	49.4611	6.36444	142.178	0.0136986
	G.mar.37_DE.MGSW_ZFMK2557907	G.mar.59_FR.CONN_ZFMK18996	51.1821	10.2208	49.4611	6.36444	333.753	0.00608828
	G.mar.38_DE.MGSW_ZFMK2557908	G.mar.59_FR.CONN_ZFMK18996	51.1821	10.2208	49.4611	6.36444	333.753	0.00608828
	G.mar.39_DE.NDTO_ZFMK100409283	G.mar.59_FR.CONN_ZFMK18996	53.9192	10.0977	49.4611	6.36444	557.995	0.00913242
	G.mar.40_DE.NDTO_ZFMK2538190	G.mar.59_FR.CONN_ZFMK18996	54.303	10.756	49.4611	6.36444	616.364	0.00458015
	G.mar.41_DE.NDTO_ZFMK2538253	G.mar.59_FR.CONN_ZFMK18996	53.124	13.884	49.4611	6.36444	661.791	0.0137195
	G.mar.42_DE.NDTO_ZFMK2553394	G.mar.59_FR.CONN_ZFMK18996	53.6525	11.4369	49.4611	6.36444	582.578	0.00608828
	G.mar.43_DE.NDTO_ZFMK2553395	G.mar.59_FR.CONN_ZFMK18996	53.6525	11.4369	49.4611	6.36444	582.578	0.00608828
	G.mar.44_DE.NDTO_ZFMK2553405	G.mar.59_FR.CONN_ZFMK18996	53.2794	12.0768	49.4611	6.36444	580.233	0.00913242
	G.mar.45_DE.NDTW_ZFMK100409272	G.mar.59_FR.CONN_ZFMK18996	52.9604	9.8927	49.4611	6.36444	459.808	0.00304414
	G.mar.46_DE.NDTW_ZFMK19472	G.mar.59_FR.CONN_ZFMK18996	51.4423	7.2665	49.4611	6.36444	229.22	0.0243902
	G.mar.47_DE.SSL_ZFMK100409123	G.mar.59_FR.CONN_ZFMK18996	49.9826	9.7681	49.4611	6.36444	251.275	0.00608828
	G.mar.48_DE.SSL_ZFMK100409296	G.mar.59_FR.CONN_ZFMK18996	49.8641	9.8573	49.4611	6.36444	255.176	0.00608828
	G.mar.49_ES.CC_ZFMK1861	G.mar.59_FR.CONN_ZFMK18996	42.4298	-2.56196	49.4611	6.36444	1040.79	0.0106545
	G.mar.50_ES.CC_ZFMK1863	G.mar.59_FR.CONN_ZFMK18996	43.2338	-1.63782	49.4611	6.36444	923.989	0.0121766
	G.mar.51_ES.CC_ZFMK1893	G.mar.59_FR.CONN_ZFMK18996	43.2338	-1.63782	49.4611	6.36444	923.989	0.0106545
	G.mar.52_ES.PYRS_ZFMK2517202	G.mar.59_FR.CONN_ZFMK18996	41.3155	1.10444	49.4611	6.36444	993.305	0.00761035
	G.mar.53_FR.ALP_BGI12GEU183	G.mar.59_FR.CONN_ZFMK18996	45.2731	5.76573	49.4611	6.36444	467.562	0.00608828
	G.mar.54_FR.ALP_ZFMK2517217	G.mar.59_FR.CONN_ZFMK18996	45.0707	6.00764	49.4611	6.36444	488.628	0.00608828
	G.mar.55_FR.ATLN_ZFMK2553457	G.mar.59_FR.CONN_ZFMK18996	48.2014	0.1711	49.4611	6.36444	474.023	0.00761035
	G.mar.56_FR.ATLN_TW163	G.mar.59_FR.CONN_ZFMK18996	48.2297	-0.2422	49.4611	6.36444	501.963	0.0121766
	G.mar.57_FR.ATLN_TW164	G.mar.59_FR.CONN_ZFMK18996	47.2611	0.3256	49.4611	6.36444	508.289	0.0136986
	G.mar.58_FR.CONN_ZFMK100410157	G.mar.59_FR.CONN_ZFMK18996	47.8123	7.0651	49.4611	6.36444	190.309	0
	G.mar.01_DE.MGSO_GBOL33714	G.mar.60_FR.CONN_ZFMK2517315	51.7429	10.7672	47.8591	6.4036	532.918	0.00920245
	G.mar.02_DE.MGSO_ZFMK100409275	G.mar.60_FR.CONN_ZFMK2517315	51.7435	10.7673	47.8591	6.4036	532.975	0.0107362
	G.mar.03_DE.MGSO_ZFMK1634	G.mar.60_FR.CONN_ZFMK2517315	51.841	10.326	47.8591	6.4036	524.024	0.0107362
	G.mar.04_DE.MGSO_ZFMK1909	G.mar.60_FR.CONN_ZFMK2517315	50.8953	11.7527	47.8591	6.4036	513.201	0.00766871
	G.mar.05_DE.MGSO_ZFMK19531	G.mar.60_FR.CONN_ZFMK2517315	50.8953	11.7527	47.8591	6.4036	513.201	0.00766871
	G.mar.06_DE.MGSO_ZFMK2503693	G.mar.60_FR.CONN_ZFMK2517315	50.9194	11.5479	47.8591	6.4036	503.877	0.00766871
	G.mar.07_DE.MGSO_ZFMK2503694	G.mar.60_FR.CONN_ZFMK2517315	50.9194	11.5479	47.8591	6.4036	503.877	0.00766871
	G.mar.08_DE.MGSO_ZFMK2542470	G.mar.60_FR.CONN_ZFMK2517315	50.892	11.8209	47.8591	6.4036	516.696	0.00766871
	G.mar.09_DE.MGSO_ZFMK2542471	G.mar.60_FR.CONN_ZFMK2517315	50.892	11.8209	47.8591	6.4036	516.696	0.00920245
	G.mar.10_DE.MGSO_ZFMK2542541	G.mar.60_FR.CONN_ZFMK2517315	51.133	11.7487	47.8591	6.4036	530.02	0.00766871
	G.mar.11_DE.MGSO_ZFMK2542542	G.mar.60_FR.CONN_ZFMK2517315	51.133	11.7487	47.8591	6.4036	530.02	0.00766871
	G.mar.12_DE.MGSW_ZFMK18967	G.mar.60_FR.CONN_ZFMK2517315	50.6627	7.1026	47.8591	6.4036	315.643	0.0107362
	G.mar.13_DE.MGSW_ZFMK18987	G.mar.60_FR.CONN_ZFMK2517315	50.6659	7.2156	47.8591	6.4036	317.41	0.0107362
	G.mar.14_DE.MGSW_ZFMK18988	G.mar.60_FR.CONN_ZFMK2517315	50.6867	7.2997	47.8591	6.4036	320.857	0.00920245
	G.mar.15_DE.MGSW_ZFMK18991	G.mar.60_FR.CONN_ZFMK2517315	50.7667	7.3667	47.8591	6.4036	330.547	0.0122699
	G.mar.16_DE.MGSW_ZFMK19003	G.mar.60_FR.CONN_ZFMK2517315	51.361	7.5499	47.8591	6.4036	397.793	0.0122699
	G.mar.17_DE.MGSW_ZFMK19005	G.mar.60_FR.CONN_ZFMK2517315	51.361	7.5499	47.8591	6.4036	397.793	0.00920245
	G.mar.18_DE.MGSW_ZFMK19029	G.mar.60_FR.CONN_ZFMK2517315	50.56	6.8078	47.8591	6.4036	301.568	0.0306748
	G.mar.19_DE.MGSW_ZFMK19031	G.mar.60_FR.CONN_ZFMK2517315	51.2299	7.054	47.8591	6.4036	377.5	0.0138037
	G.mar.20_DE.MGSW_ZFMK19044	G.mar.60_FR.CONN_ZFMK2517315	50.8026	7.2418	47.8591	6.4036	332.675	0.00920245
	G.mar.21_DE.MGSW_ZFMK19045	G.mar.60_FR.CONN_ZFMK2517315	51.3589	7.1697	47.8591	6.4036	392.803	0.0107362
	G.mar.22_DE.MGSW_ZFMK19046	G.mar.60_FR.CONN_ZFMK2517315	51.2299	7.054	47.8591	6.4036	377.5	0.0107362
	G.mar.23_DE.MGSW_ZFMK19047	G.mar.60_FR.CONN_ZFMK2517315	50.714	7.1772	47.8591	6.4036	322.163	0.0122699
	G.mar.24_DE.MGSW_ZFMK19048	G.mar.60_FR.CONN_ZFMK2517315	50.6715	7.0469	47.8591	6.4036	315.987	0.00920245
	G.mar.25_DE.MGSW_ZFMK19049	G.mar.60_FR.CONN_ZFMK2517315	51.291	7.2522	47.8591	6.4036	386.234	0.0107362
	G.mar.26_DE.MGSW_ZFMK19051	G.mar.60_FR.CONN_ZFMK2517315	50.5511	7.1722	47.8591	6.4036	304.304	0.0306748
	G.mar.27_DE.MGSW_ZFMK19054	G.mar.60_FR.CONN_ZFMK2517315	50.4647	7.2225	47.8591	6.4036	295.594	0.0306748
	G.mar.28_DE.MGSW_ZFMK19057	G.mar.60_FR.CONN_ZFMK2517315	51.361	7.5499	47.8591	6.4036	397.793	0.0107362
	G.mar.29_DE.MGSW_ZFMK19539	G.mar.60_FR.CONN_ZFMK2517315	50.6319	6.4731	47.8591	6.4036	308.169	0.0322086
	G.mar.30_DE.MGSW_ZFMK19550	G.mar.60_FR.CONN_ZFMK2517315	50.7797	8.0085	47.8591	6.4036	344.722	0.0107362
	G.mar.31_DE.MGSW_ZFMK19555	G.mar.60_FR.CONN_ZFMK2517315	50.7797	8.0085	47.8591	6.4036	344.722	0.0230061
	G.mar.32_DE.MGSW_ZFMK19558	G.mar.60_FR.CONN_ZFMK2517315	50.7093	7.7132	47.8591	6.4036	330.635	0.0122699
	G.mar.33_DE.MGSW_ZFMK19560	G.mar.60_FR.CONN_ZFMK2517315	50.7093	7.7132	47.8591	6.4036	330.635	0.0107362
	G.mar.34_DE.MGSW_ZFMK19561	G.mar.60_FR.CONN_ZFMK2517315	50.7093	7.7132	47.8591	6.4036	330.635	0.0107362
	G.mar.35_DE.MGSW_ZFMK2516208	G.mar.60_FR.CONN_ZFMK2517315	50.6245	7.1936	47.8591	6.4036	312.599	0.0153374
	G.mar.36_DE.MGSW_ZFMK2516209	G.mar.60_FR.CONN_ZFMK2517315	50.6245	7.1936	47.8591	6.4036	312.599	0.0153374
	G.mar.37_DE.MGSW_ZFMK2557907	G.mar.60_FR.CONN_ZFMK2517315	51.1821	10.2208	47.8591	6.4036	460.504	0.00766871
	G.mar.38_DE.MGSW_ZFMK2557908	G.mar.60_FR.CONN_ZFMK2517315	51.1821	10.2208	47.8591	6.4036	460.504	0.00766871
	G.mar.39_DE.NDTO_ZFMK100409283	G.mar.60_FR.CONN_ZFMK2517315	53.9192	10.0977	47.8591	6.4036	721.253	0.0107362
	G.mar.40_DE.NDTO_ZFMK2538190	G.mar.60_FR.CONN_ZFMK2517315	54.303	10.756	47.8591	6.4036	777.508	0.00615385
	G.mar.41_DE.NDTO_ZFMK2538253	G.mar.60_FR.CONN_ZFMK2517315	53.124	13.884	47.8591	6.4036	787.826	0.015361
	G.mar.42_DE.NDTO_ZFMK2553394	G.mar.60_FR.CONN_ZFMK2517315	53.6525	11.4369	47.8591	6.4036	734.193	0.00766871
	G.mar.43_DE.NDTO_ZFMK2553395	G.mar.60_FR.CONN_ZFMK2517315	53.6525	11.4369	47.8591	6.4036	734.193	0.00766871
	G.mar.44_DE.NDTO_ZFMK2553405	G.mar.60_FR.CONN_ZFMK2517315	53.2794	12.0768	47.8591	6.4036	722.779	0.0107362
	G.mar.45_DE.NDTW_ZFMK100409272	G.mar.60_FR.CONN_ZFMK2517315	52.9604	9.8927	47.8591	6.4036	618.21	0.00460123
	G.mar.46_DE.NDTW_ZFMK19472	G.mar.60_FR.CONN_ZFMK2517315	51.4423	7.2665	47.8591	6.4036	402.986	0.0261137
	G.mar.47_DE.SSL_ZFMK100409123	G.mar.60_FR.CONN_ZFMK2517315	49.9826	9.7681	47.8591	6.4036	340.583	0.00766871
	G.mar.48_DE.SSL_ZFMK100409296	G.mar.60_FR.CONN_ZFMK2517315	49.8641	9.8573	47.8591	6.4036	336.676	0.00766871
	G.mar.49_ES.CC_ZFMK1861	G.mar.60_FR.CONN_ZFMK2517315	42.4298	-2.56196	47.8591	6.4036	925.102	0.0122699
	G.mar.50_ES.CC_ZFMK1863	G.mar.60_FR.CONN_ZFMK2517315	43.2338	-1.63782	47.8591	6.4036	809.089	0.0138037
	G.mar.51_ES.CC_ZFMK1893	G.mar.60_FR.CONN_ZFMK2517315	43.2338	-1.63782	47.8591	6.4036	809.089	0.0122699
	G.mar.52_ES.PYRS_ZFMK2517202	G.mar.60_FR.CONN_ZFMK2517315	41.3155	1.10444	47.8591	6.4036	838.949	0.00920245
	G.mar.53_FR.ALP_BGI12GEU183	G.mar.60_FR.CONN_ZFMK2517315	45.2731	5.76573	47.8591	6.4036	291.466	0.00766871
	G.mar.54_FR.ALP_ZFMK2517217	G.mar.60_FR.CONN_ZFMK2517315	45.0707	6.00764	47.8591	6.4036	311.342	0.00766871
	G.mar.55_FR.ATLN_ZFMK2553457	G.mar.60_FR.CONN_ZFMK2517315	48.2014	0.1711	47.8591	6.4036	464.59	0.00920245
	G.mar.56_FR.ATLN_TW163	G.mar.60_FR.CONN_ZFMK2517315	48.2297	-0.2422	47.8591	6.4036	495.296	0.0138037
	G.mar.57_FR.ATLN_TW164	G.mar.60_FR.CONN_ZFMK2517315	47.2611	0.3256	47.8591	6.4036	460.478	0.0153374
	G.mar.58_FR.CONN_ZFMK100410157	G.mar.60_FR.CONN_ZFMK2517315	47.8123	7.0651	47.8591	6.4036	49.6169	0.00153374
	G.mar.59_FR.CONN_ZFMK18996	G.mar.60_FR.CONN_ZFMK2517315	49.4611	6.36444	47.8591	6.4036	178.047	0.00153374
	G.mar.01_DE.MGSO_GBOL33714	G.mar.61_FR.CONN_ZFMK2517322	51.7429	10.7672	47.8387	6.6671	523.979	0.00761035
	G.mar.02_DE.MGSO_ZFMK100409275	G.mar.61_FR.CONN_ZFMK2517322	51.7435	10.7673	47.8387	6.6671	524.037	0.00913242
	G.mar.03_DE.MGSO_ZFMK1634	G.mar.61_FR.CONN_ZFMK2517322	51.841	10.326	47.8387	6.6671	516.149	0.00913242
	G.mar.04_DE.MGSO_ZFMK1909	G.mar.61_FR.CONN_ZFMK2517322	50.8953	11.7527	47.8387	6.6671	500.6	0.00608828
	G.mar.05_DE.MGSO_ZFMK19531	G.mar.61_FR.CONN_ZFMK2517322	50.8953	11.7527	47.8387	6.6671	500.6	0.00608828
	G.mar.06_DE.MGSO_ZFMK2503693	G.mar.61_FR.CONN_ZFMK2517322	50.9194	11.5479	47.8387	6.6671	491.624	0.00608828
	G.mar.07_DE.MGSO_ZFMK2503694	G.mar.61_FR.CONN_ZFMK2517322	50.9194	11.5479	47.8387	6.6671	491.624	0.00608828
	G.mar.08_DE.MGSO_ZFMK2542470	G.mar.61_FR.CONN_ZFMK2517322	50.892	11.8209	47.8387	6.6671	503.995	0.00608828
	G.mar.09_DE.MGSO_ZFMK2542471	G.mar.61_FR.CONN_ZFMK2517322	50.892	11.8209	47.8387	6.6671	503.995	0.00761035
	G.mar.10_DE.MGSO_ZFMK2542541	G.mar.61_FR.CONN_ZFMK2517322	51.133	11.7487	47.8387	6.6671	518.024	0.00608828
	G.mar.11_DE.MGSO_ZFMK2542542	G.mar.61_FR.CONN_ZFMK2517322	51.133	11.7487	47.8387	6.6671	518.024	0.00608828
	G.mar.12_DE.MGSW_ZFMK18967	G.mar.61_FR.CONN_ZFMK2517322	50.6627	7.1026	47.8387	6.6671	315.402	0.00913242
	G.mar.13_DE.MGSW_ZFMK18987	G.mar.61_FR.CONN_ZFMK2517322	50.6659	7.2156	47.8387	6.6671	316.679	0.00913242
	G.mar.14_DE.MGSW_ZFMK18988	G.mar.61_FR.CONN_ZFMK2517322	50.6867	7.2997	47.8387	6.6671	319.789	0.0106545
	G.mar.15_DE.MGSW_ZFMK18991	G.mar.61_FR.CONN_ZFMK2517322	50.7667	7.3667	47.8387	6.6671	329.295	0.0106545
	G.mar.16_DE.MGSW_ZFMK19003	G.mar.61_FR.CONN_ZFMK2517322	51.361	7.5499	47.8387	6.6671	396.538	0.0106545
	G.mar.17_DE.MGSW_ZFMK19005	G.mar.61_FR.CONN_ZFMK2517322	51.361	7.5499	47.8387	6.6671	396.538	0.00761035
	G.mar.18_DE.MGSW_ZFMK19029	G.mar.61_FR.CONN_ZFMK2517322	50.56	6.8078	47.8387	6.6671	302.577	0.0289193
	G.mar.19_DE.MGSW_ZFMK19031	G.mar.61_FR.CONN_ZFMK2517322	51.2299	7.054	47.8387	6.6671	377.878	0.0121766
	G.mar.20_DE.MGSW_ZFMK19044	G.mar.61_FR.CONN_ZFMK2517322	50.8026	7.2418	47.8387	6.6671	331.981	0.0106545
	G.mar.21_DE.MGSW_ZFMK19045	G.mar.61_FR.CONN_ZFMK2517322	51.3589	7.1697	47.8387	6.6671	392.851	0.00913242
	G.mar.22_DE.MGSW_ZFMK19046	G.mar.61_FR.CONN_ZFMK2517322	51.2299	7.054	47.8387	6.6671	377.878	0.00913242
	G.mar.23_DE.MGSW_ZFMK19047	G.mar.61_FR.CONN_ZFMK2517322	50.714	7.1772	47.8387	6.6671	321.649	0.0106545
	G.mar.24_DE.MGSW_ZFMK19048	G.mar.61_FR.CONN_ZFMK2517322	50.6715	7.0469	47.8387	6.6671	315.997	0.00761035
	G.mar.25_DE.MGSW_ZFMK19049	G.mar.61_FR.CONN_ZFMK2517322	51.291	7.2522	47.8387	6.6671	385.944	0.00913242
	G.mar.26_DE.MGSW_ZFMK19051	G.mar.61_FR.CONN_ZFMK2517322	50.5511	7.1722	47.8387	6.6671	303.637	0.0289193
	G.mar.27_DE.MGSW_ZFMK19054	G.mar.61_FR.CONN_ZFMK2517322	50.4647	7.2225	47.8387	6.6671	294.591	0.0289193
	G.mar.28_DE.MGSW_ZFMK19057	G.mar.61_FR.CONN_ZFMK2517322	51.361	7.5499	47.8387	6.6671	396.538	0.00913242
	G.mar.29_DE.MGSW_ZFMK19539	G.mar.61_FR.CONN_ZFMK2517322	50.6319	6.4731	47.8387	6.6671	310.713	0.0304414
	G.mar.30_DE.MGSW_ZFMK19550	G.mar.61_FR.CONN_ZFMK2517322	50.7797	8.0085	47.8387	6.6671	340.947	0.00913242
	G.mar.31_DE.MGSW_ZFMK19555	G.mar.61_FR.CONN_ZFMK2517322	50.7797	8.0085	47.8387	6.6671	340.947	0.021309
	G.mar.32_DE.MGSW_ZFMK19558	G.mar.61_FR.CONN_ZFMK2517322	50.7093	7.7132	47.8387	6.6671	327.879	0.0106545
	G.mar.33_DE.MGSW_ZFMK19560	G.mar.61_FR.CONN_ZFMK2517322	50.7093	7.7132	47.8387	6.6671	327.879	0.00913242
	G.mar.34_DE.MGSW_ZFMK19561	G.mar.61_FR.CONN_ZFMK2517322	50.7093	7.7132	47.8387	6.6671	327.879	0.00913242
	G.mar.35_DE.MGSW_ZFMK2516208	G.mar.61_FR.CONN_ZFMK2517322	50.6245	7.1936	47.8387	6.6671	311.919	0.0136986
	G.mar.36_DE.MGSW_ZFMK2516209	G.mar.61_FR.CONN_ZFMK2517322	50.6245	7.1936	47.8387	6.6671	311.919	0.0136986
	G.mar.37_DE.MGSW_ZFMK2557907	G.mar.61_FR.CONN_ZFMK2517322	51.1821	10.2208	47.8387	6.6671	451.31	0.00608828
	G.mar.38_DE.MGSW_ZFMK2557908	G.mar.61_FR.CONN_ZFMK2517322	51.1821	10.2208	47.8387	6.6671	451.31	0.00608828
	G.mar.39_DE.NDTO_ZFMK100409283	G.mar.61_FR.CONN_ZFMK2517322	53.9192	10.0977	47.8387	6.6671	717.017	0.00913242
	G.mar.40_DE.NDTO_ZFMK2538190	G.mar.61_FR.CONN_ZFMK2517322	54.303	10.756	47.8387	6.6671	772.679	0.00458015
	G.mar.41_DE.NDTO_ZFMK2538253	G.mar.61_FR.CONN_ZFMK2517322	53.124	13.884	47.8387	6.6671	777.291	0.0137195
	G.mar.42_DE.NDTO_ZFMK2553394	G.mar.61_FR.CONN_ZFMK2517322	53.6525	11.4369	47.8387	6.6671	727.538	0.00608828
	G.mar.43_DE.NDTO_ZFMK2553395	G.mar.61_FR.CONN_ZFMK2517322	53.6525	11.4369	47.8387	6.6671	727.538	0.00608828
	G.mar.44_DE.NDTO_ZFMK2553405	G.mar.61_FR.CONN_ZFMK2517322	53.2794	12.0768	47.8387	6.6671	714.653	0.00913242
	G.mar.45_DE.NDTW_ZFMK100409272	G.mar.61_FR.CONN_ZFMK2517322	52.9604	9.8927	47.8387	6.6671	613.14	0.00304414
	G.mar.46_DE.NDTW_ZFMK19472	G.mar.61_FR.CONN_ZFMK2517322	51.4423	7.2665	47.8387	6.6671	402.763	0.0243902
	G.mar.47_DE.SSL_ZFMK100409123	G.mar.61_FR.CONN_ZFMK2517322	49.9826	9.7681	47.8387	6.6671	328.659	0.00608828
	G.mar.48_DE.SSL_ZFMK100409296	G.mar.61_FR.CONN_ZFMK2517322	49.8641	9.8573	47.8387	6.6671	324.096	0.00608828
	G.mar.49_ES.CC_ZFMK1861	G.mar.61_FR.CONN_ZFMK2517322	42.4298	-2.56196	47.8387	6.6671	939.46	0.0106545
	G.mar.50_ES.CC_ZFMK1863	G.mar.61_FR.CONN_ZFMK2517322	43.2338	-1.63782	47.8387	6.6671	823.677	0.0121766
	G.mar.51_ES.CC_ZFMK1893	G.mar.61_FR.CONN_ZFMK2517322	43.2338	-1.63782	47.8387	6.6671	823.677	0.0106545
	G.mar.52_ES.PYRS_ZFMK2517202	G.mar.61_FR.CONN_ZFMK2517322	41.3155	1.10444	47.8387	6.6671	847.616	0.00761035
	G.mar.53_FR.ALP_BGI12GEU183	G.mar.61_FR.CONN_ZFMK2517322	45.2731	5.76573	47.8387	6.6671	293.296	0.00608828
	G.mar.54_FR.ALP_ZFMK2517217	G.mar.61_FR.CONN_ZFMK2517322	45.0707	6.00764	47.8387	6.6671	311.71	0.00608828
	G.mar.55_FR.ATLN_ZFMK2553457	G.mar.61_FR.CONN_ZFMK2517322	48.2014	0.1711	47.8387	6.6671	484.37	0.00761035
	G.mar.56_FR.ATLN_TW163	G.mar.61_FR.CONN_ZFMK2517322	48.2297	-0.2422	47.8387	6.6671	515.075	0.0121766
	G.mar.57_FR.ATLN_TW164	G.mar.61_FR.CONN_ZFMK2517322	47.2611	0.3256	47.8387	6.6671	479.807	0.0136986
	G.mar.58_FR.CONN_ZFMK100410157	G.mar.61_FR.CONN_ZFMK2517322	47.8123	7.0651	47.8387	6.6671	29.8387	0
	G.mar.59_FR.CONN_ZFMK18996	G.mar.61_FR.CONN_ZFMK2517322	49.4611	6.36444	47.8387	6.6671	181.654	0
	G.mar.60_FR.CONN_ZFMK2517315	G.mar.61_FR.CONN_ZFMK2517322	47.8591	6.4036	47.8387	6.6671	19.7808	0.00153374
	G.mar.01_DE.MGSO_GBOL33714	G.mar.62_FR.CONN_TW161	51.7429	10.7672	47.8387	6.6671	523.979	0.00913242
	G.mar.02_DE.MGSO_ZFMK100409275	G.mar.62_FR.CONN_TW161	51.7435	10.7673	47.8387	6.6671	524.037	0.0106545
	G.mar.03_DE.MGSO_ZFMK1634	G.mar.62_FR.CONN_TW161	51.841	10.326	47.8387	6.6671	516.149	0.0106545
	G.mar.04_DE.MGSO_ZFMK1909	G.mar.62_FR.CONN_TW161	50.8953	11.7527	47.8387	6.6671	500.6	0.00761035
	G.mar.05_DE.MGSO_ZFMK19531	G.mar.62_FR.CONN_TW161	50.8953	11.7527	47.8387	6.6671	500.6	0.00761035
	G.mar.06_DE.MGSO_ZFMK2503693	G.mar.62_FR.CONN_TW161	50.9194	11.5479	47.8387	6.6671	491.624	0.00761035
	G.mar.07_DE.MGSO_ZFMK2503694	G.mar.62_FR.CONN_TW161	50.9194	11.5479	47.8387	6.6671	491.624	0.00761035
	G.mar.08_DE.MGSO_ZFMK2542470	G.mar.62_FR.CONN_TW161	50.892	11.8209	47.8387	6.6671	503.995	0.00761035
	G.mar.09_DE.MGSO_ZFMK2542471	G.mar.62_FR.CONN_TW161	50.892	11.8209	47.8387	6.6671	503.995	0.00913242
	G.mar.10_DE.MGSO_ZFMK2542541	G.mar.62_FR.CONN_TW161	51.133	11.7487	47.8387	6.6671	518.024	0.00761035
	G.mar.11_DE.MGSO_ZFMK2542542	G.mar.62_FR.CONN_TW161	51.133	11.7487	47.8387	6.6671	518.024	0.00761035
	G.mar.12_DE.MGSW_ZFMK18967	G.mar.62_FR.CONN_TW161	50.6627	7.1026	47.8387	6.6671	315.402	0.0106545
	G.mar.13_DE.MGSW_ZFMK18987	G.mar.62_FR.CONN_TW161	50.6659	7.2156	47.8387	6.6671	316.679	0.0106545
	G.mar.14_DE.MGSW_ZFMK18988	G.mar.62_FR.CONN_TW161	50.6867	7.2997	47.8387	6.6671	319.789	0.0121766
	G.mar.15_DE.MGSW_ZFMK18991	G.mar.62_FR.CONN_TW161	50.7667	7.3667	47.8387	6.6671	329.295	0.0121766
	G.mar.16_DE.MGSW_ZFMK19003	G.mar.62_FR.CONN_TW161	51.361	7.5499	47.8387	6.6671	396.538	0.0121766
	G.mar.17_DE.MGSW_ZFMK19005	G.mar.62_FR.CONN_TW161	51.361	7.5499	47.8387	6.6671	396.538	0.00913242
	G.mar.18_DE.MGSW_ZFMK19029	G.mar.62_FR.CONN_TW161	50.56	6.8078	47.8387	6.6671	302.577	0.0304414
	G.mar.19_DE.MGSW_ZFMK19031	G.mar.62_FR.CONN_TW161	51.2299	7.054	47.8387	6.6671	377.878	0.0136986
	G.mar.20_DE.MGSW_ZFMK19044	G.mar.62_FR.CONN_TW161	50.8026	7.2418	47.8387	6.6671	331.981	0.0121766
	G.mar.21_DE.MGSW_ZFMK19045	G.mar.62_FR.CONN_TW161	51.3589	7.1697	47.8387	6.6671	392.851	0.0106545
	G.mar.22_DE.MGSW_ZFMK19046	G.mar.62_FR.CONN_TW161	51.2299	7.054	47.8387	6.6671	377.878	0.0106545
	G.mar.23_DE.MGSW_ZFMK19047	G.mar.62_FR.CONN_TW161	50.714	7.1772	47.8387	6.6671	321.649	0.0121766
	G.mar.24_DE.MGSW_ZFMK19048	G.mar.62_FR.CONN_TW161	50.6715	7.0469	47.8387	6.6671	315.997	0.00913242
	G.mar.25_DE.MGSW_ZFMK19049	G.mar.62_FR.CONN_TW161	51.291	7.2522	47.8387	6.6671	385.944	0.0106545
	G.mar.26_DE.MGSW_ZFMK19051	G.mar.62_FR.CONN_TW161	50.5511	7.1722	47.8387	6.6671	303.637	0.0304414
	G.mar.27_DE.MGSW_ZFMK19054	G.mar.62_FR.CONN_TW161	50.4647	7.2225	47.8387	6.6671	294.591	0.0304414
	G.mar.28_DE.MGSW_ZFMK19057	G.mar.62_FR.CONN_TW161	51.361	7.5499	47.8387	6.6671	396.538	0.0106545
	G.mar.29_DE.MGSW_ZFMK19539	G.mar.62_FR.CONN_TW161	50.6319	6.4731	47.8387	6.6671	310.713	0.0319635
	G.mar.30_DE.MGSW_ZFMK19550	G.mar.62_FR.CONN_TW161	50.7797	8.0085	47.8387	6.6671	340.947	0.0106545
	G.mar.31_DE.MGSW_ZFMK19555	G.mar.62_FR.CONN_TW161	50.7797	8.0085	47.8387	6.6671	340.947	0.0228311
	G.mar.32_DE.MGSW_ZFMK19558	G.mar.62_FR.CONN_TW161	50.7093	7.7132	47.8387	6.6671	327.879	0.0121766
	G.mar.33_DE.MGSW_ZFMK19560	G.mar.62_FR.CONN_TW161	50.7093	7.7132	47.8387	6.6671	327.879	0.0106545
	G.mar.34_DE.MGSW_ZFMK19561	G.mar.62_FR.CONN_TW161	50.7093	7.7132	47.8387	6.6671	327.879	0.0106545
	G.mar.35_DE.MGSW_ZFMK2516208	G.mar.62_FR.CONN_TW161	50.6245	7.1936	47.8387	6.6671	311.919	0.0121766
	G.mar.36_DE.MGSW_ZFMK2516209	G.mar.62_FR.CONN_TW161	50.6245	7.1936	47.8387	6.6671	311.919	0.0121766
	G.mar.37_DE.MGSW_ZFMK2557907	G.mar.62_FR.CONN_TW161	51.1821	10.2208	47.8387	6.6671	451.31	0.00761035
	G.mar.38_DE.MGSW_ZFMK2557908	G.mar.62_FR.CONN_TW161	51.1821	10.2208	47.8387	6.6671	451.31	0.00761035
	G.mar.39_DE.NDTO_ZFMK100409283	G.mar.62_FR.CONN_TW161	53.9192	10.0977	47.8387	6.6671	717.017	0.0106545
	G.mar.40_DE.NDTO_ZFMK2538190	G.mar.62_FR.CONN_TW161	54.303	10.756	47.8387	6.6671	772.679	0.00610687
	G.mar.41_DE.NDTO_ZFMK2538253	G.mar.62_FR.CONN_TW161	53.124	13.884	47.8387	6.6671	777.291	0.0152439
	G.mar.42_DE.NDTO_ZFMK2553394	G.mar.62_FR.CONN_TW161	53.6525	11.4369	47.8387	6.6671	727.538	0.00761035
	G.mar.43_DE.NDTO_ZFMK2553395	G.mar.62_FR.CONN_TW161	53.6525	11.4369	47.8387	6.6671	727.538	0.00761035
	G.mar.44_DE.NDTO_ZFMK2553405	G.mar.62_FR.CONN_TW161	53.2794	12.0768	47.8387	6.6671	714.653	0.0106545
	G.mar.45_DE.NDTW_ZFMK100409272	G.mar.62_FR.CONN_TW161	52.9604	9.8927	47.8387	6.6671	613.14	0.00456621
	G.mar.46_DE.NDTW_ZFMK19472	G.mar.62_FR.CONN_TW161	51.4423	7.2665	47.8387	6.6671	402.763	0.0259146
	G.mar.47_DE.SSL_ZFMK100409123	G.mar.62_FR.CONN_TW161	49.9826	9.7681	47.8387	6.6671	328.659	0.00761035
	G.mar.48_DE.SSL_ZFMK100409296	G.mar.62_FR.CONN_TW161	49.8641	9.8573	47.8387	6.6671	324.096	0.00761035
	G.mar.49_ES.CC_ZFMK1861	G.mar.62_FR.CONN_TW161	42.4298	-2.56196	47.8387	6.6671	939.46	0.00913242
	G.mar.50_ES.CC_ZFMK1863	G.mar.62_FR.CONN_TW161	43.2338	-1.63782	47.8387	6.6671	823.677	0.0106545
	G.mar.51_ES.CC_ZFMK1893	G.mar.62_FR.CONN_TW161	43.2338	-1.63782	47.8387	6.6671	823.677	0.00913242
	G.mar.52_ES.PYRS_ZFMK2517202	G.mar.62_FR.CONN_TW161	41.3155	1.10444	47.8387	6.6671	847.616	0.00913242
	G.mar.53_FR.ALP_BGI12GEU183	G.mar.62_FR.CONN_TW161	45.2731	5.76573	47.8387	6.6671	293.296	0.00761035
	G.mar.54_FR.ALP_ZFMK2517217	G.mar.62_FR.CONN_TW161	45.0707	6.00764	47.8387	6.6671	311.71	0.00761035
	G.mar.55_FR.ATLN_ZFMK2553457	G.mar.62_FR.CONN_TW161	48.2014	0.1711	47.8387	6.6671	484.37	0.00913242
	G.mar.56_FR.ATLN_TW163	G.mar.62_FR.CONN_TW161	48.2297	-0.2422	47.8387	6.6671	515.075	0.0136986
	G.mar.57_FR.ATLN_TW164	G.mar.62_FR.CONN_TW161	47.2611	0.3256	47.8387	6.6671	479.807	0.0121766
	G.mar.58_FR.CONN_ZFMK100410157	G.mar.62_FR.CONN_TW161	47.8123	7.0651	47.8387	6.6671	29.8387	0.00152207
	G.mar.59_FR.CONN_ZFMK18996	G.mar.62_FR.CONN_TW161	49.4611	6.36444	47.8387	6.6671	181.654	0.00152207
	G.mar.60_FR.CONN_ZFMK2517315	G.mar.62_FR.CONN_TW161	47.8591	6.4036	47.8387	6.6671	19.7808	0.00306748
	G.mar.61_FR.CONN_ZFMK2517322	G.mar.62_FR.CONN_TW161	47.8387	6.6671	47.8387	6.6671	0	0.00152207
	G.mar.01_DE.MGSO_GBOL33714	G.mar.63_FR.CONN_TW162	51.7429	10.7672	47.8167	6.8736	517.919	0.00913242
	G.mar.02_DE.MGSO_ZFMK100409275	G.mar.63_FR.CONN_TW162	51.7435	10.7673	47.8167	6.8736	517.978	0.0106545
	G.mar.03_DE.MGSO_ZFMK1634	G.mar.63_FR.CONN_TW162	51.841	10.326	47.8167	6.8736	510.973	0.0106545
	G.mar.04_DE.MGSO_ZFMK1909	G.mar.63_FR.CONN_TW162	50.8953	11.7527	47.8167	6.8736	491.493	0.00761035
	G.mar.05_DE.MGSO_ZFMK19531	G.mar.63_FR.CONN_TW162	50.8953	11.7527	47.8167	6.8736	491.493	0.00761035
	G.mar.06_DE.MGSO_ZFMK2503693	G.mar.63_FR.CONN_TW162	50.9194	11.5479	47.8167	6.8736	482.82	0.00761035
	G.mar.07_DE.MGSO_ZFMK2503694	G.mar.63_FR.CONN_TW162	50.9194	11.5479	47.8167	6.8736	482.82	0.00761035
	G.mar.08_DE.MGSO_ZFMK2542470	G.mar.63_FR.CONN_TW162	50.892	11.8209	47.8167	6.8736	494.801	0.00761035
	G.mar.09_DE.MGSO_ZFMK2542471	G.mar.63_FR.CONN_TW162	50.892	11.8209	47.8167	6.8736	494.801	0.00913242
	G.mar.10_DE.MGSO_ZFMK2542541	G.mar.63_FR.CONN_TW162	51.133	11.7487	47.8167	6.8736	509.417	0.00761035
	G.mar.11_DE.MGSO_ZFMK2542542	G.mar.63_FR.CONN_TW162	51.133	11.7487	47.8167	6.8736	509.417	0.00761035
	G.mar.12_DE.MGSW_ZFMK18967	G.mar.63_FR.CONN_TW162	50.6627	7.1026	47.8167	6.8736	316.698	0.0106545
	G.mar.13_DE.MGSW_ZFMK18987	G.mar.63_FR.CONN_TW162	50.6659	7.2156	47.8167	6.8736	317.587	0.0106545
	G.mar.14_DE.MGSW_ZFMK18988	G.mar.63_FR.CONN_TW162	50.6867	7.2997	47.8167	6.8736	320.422	0.0121766
	G.mar.15_DE.MGSW_ZFMK18991	G.mar.63_FR.CONN_TW162	50.7667	7.3667	47.8167	6.8736	329.759	0.0121766
	G.mar.16_DE.MGSW_ZFMK19003	G.mar.63_FR.CONN_TW162	51.361	7.5499	47.8167	6.8736	396.858	0.0121766
	G.mar.17_DE.MGSW_ZFMK19005	G.mar.63_FR.CONN_TW162	51.361	7.5499	47.8167	6.8736	396.858	0.00913242
	G.mar.18_DE.MGSW_ZFMK19029	G.mar.63_FR.CONN_TW162	50.56	6.8078	47.8167	6.8736	304.887	0.0304414
	G.mar.19_DE.MGSW_ZFMK19031	G.mar.63_FR.CONN_TW162	51.2299	7.054	47.8167	6.8736	379.515	0.0136986
	G.mar.20_DE.MGSW_ZFMK19044	G.mar.63_FR.CONN_TW162	50.8026	7.2418	47.8167	6.8736	332.878	0.0121766
	G.mar.21_DE.MGSW_ZFMK19045	G.mar.63_FR.CONN_TW162	51.3589	7.1697	47.8167	6.8736	394.204	0.0106545
	G.mar.22_DE.MGSW_ZFMK19046	G.mar.63_FR.CONN_TW162	51.2299	7.054	47.8167	6.8736	379.515	0.0106545
	G.mar.23_DE.MGSW_ZFMK19047	G.mar.63_FR.CONN_TW162	50.714	7.1772	47.8167	6.8736	322.714	0.0121766
	G.mar.24_DE.MGSW_ZFMK19048	G.mar.63_FR.CONN_TW162	50.6715	7.0469	47.8167	6.8736	317.489	0.00913242
	G.mar.25_DE.MGSW_ZFMK19049	G.mar.63_FR.CONN_TW162	51.291	7.2522	47.8167	6.8736	387.044	0.0106545
	G.mar.26_DE.MGSW_ZFMK19051	G.mar.63_FR.CONN_TW162	50.5511	7.1722	47.8167	6.8736	304.633	0.0304414
	G.mar.27_DE.MGSW_ZFMK19054	G.mar.63_FR.CONN_TW162	50.4647	7.2225	47.8167	6.8736	295.349	0.0304414
	G.mar.28_DE.MGSW_ZFMK19057	G.mar.63_FR.CONN_TW162	51.361	7.5499	47.8167	6.8736	396.858	0.0106545
	G.mar.29_DE.MGSW_ZFMK19539	G.mar.63_FR.CONN_TW162	50.6319	6.4731	47.8167	6.8736	314.185	0.0319635
	G.mar.30_DE.MGSW_ZFMK19550	G.mar.63_FR.CONN_TW162	50.7797	8.0085	47.8167	6.8736	339.368	0.0106545
	G.mar.31_DE.MGSW_ZFMK19555	G.mar.63_FR.CONN_TW162	50.7797	8.0085	47.8167	6.8736	339.368	0.0228311
	G.mar.32_DE.MGSW_ZFMK19558	G.mar.63_FR.CONN_TW162	50.7093	7.7132	47.8167	6.8736	327.15	0.0121766
	G.mar.33_DE.MGSW_ZFMK19560	G.mar.63_FR.CONN_TW162	50.7093	7.7132	47.8167	6.8736	327.15	0.0106545
	G.mar.34_DE.MGSW_ZFMK19561	G.mar.63_FR.CONN_TW162	50.7093	7.7132	47.8167	6.8736	327.15	0.0106545
	G.mar.35_DE.MGSW_ZFMK2516208	G.mar.63_FR.CONN_TW162	50.6245	7.1936	47.8167	6.8736	312.879	0.0152207
	G.mar.36_DE.MGSW_ZFMK2516209	G.mar.63_FR.CONN_TW162	50.6245	7.1936	47.8167	6.8736	312.879	0.0152207
	G.mar.37_DE.MGSW_ZFMK2557907	G.mar.63_FR.CONN_TW162	51.1821	10.2208	47.8167	6.8736	445.109	0.00761035
	G.mar.38_DE.MGSW_ZFMK2557908	G.mar.63_FR.CONN_TW162	51.1821	10.2208	47.8167	6.8736	445.109	0.00761035
	G.mar.39_DE.NDTO_ZFMK100409283	G.mar.63_FR.CONN_TW162	53.9192	10.0977	47.8167	6.8736	714.651	0.0106545
	G.mar.40_DE.NDTO_ZFMK2538190	G.mar.63_FR.CONN_TW162	54.303	10.756	47.8167	6.8736	769.811	0.00610687
	G.mar.41_DE.NDTO_ZFMK2538253	G.mar.63_FR.CONN_TW162	53.124	13.884	47.8167	6.8736	769.775	0.0152439
	G.mar.42_DE.NDTO_ZFMK2553394	G.mar.63_FR.CONN_TW162	53.6525	11.4369	47.8167	6.8736	723.218	0.00761035
	G.mar.43_DE.NDTO_ZFMK2553395	G.mar.63_FR.CONN_TW162	53.6525	11.4369	47.8167	6.8736	723.218	0.00761035
	G.mar.44_DE.NDTO_ZFMK2553405	G.mar.63_FR.CONN_TW162	53.2794	12.0768	47.8167	6.8736	709.141	0.0106545
	G.mar.45_DE.NDTW_ZFMK100409272	G.mar.63_FR.CONN_TW162	52.9604	9.8927	47.8167	6.8736	610.167	0.00456621
	G.mar.46_DE.NDTW_ZFMK19472	G.mar.63_FR.CONN_TW162	51.4423	7.2665	47.8167	6.8736	403.885	0.0259146
	G.mar.47_DE.SSL_ZFMK100409123	G.mar.63_FR.CONN_TW162	49.9826	9.7681	47.8167	6.8736	320.325	0.00761035
	G.mar.48_DE.SSL_ZFMK100409296	G.mar.63_FR.CONN_TW162	49.8641	9.8573	47.8167	6.8736	315.205	0.00761035
	G.mar.49_ES.CC_ZFMK1861	G.mar.63_FR.CONN_TW162	42.4298	-2.56196	47.8167	6.8736	950.494	0.0121766
	G.mar.50_ES.CC_ZFMK1863	G.mar.63_FR.CONN_TW162	43.2338	-1.63782	47.8167	6.8736	834.916	0.0136986
	G.mar.51_ES.CC_ZFMK1893	G.mar.63_FR.CONN_TW162	43.2338	-1.63782	47.8167	6.8736	834.916	0.0121766
	G.mar.52_ES.PYRS_ZFMK2517202	G.mar.63_FR.CONN_TW162	41.3155	1.10444	47.8167	6.8736	854.159	0.00913242
	G.mar.53_FR.ALP_BGI12GEU183	G.mar.63_FR.CONN_TW162	45.2731	5.76573	47.8167	6.8736	295.056	0.00761035
	G.mar.54_FR.ALP_ZFMK2517217	G.mar.63_FR.CONN_TW162	45.0707	6.00764	47.8167	6.8736	312.268	0.00761035
	G.mar.55_FR.ATLN_ZFMK2553457	G.mar.63_FR.CONN_TW162	48.2014	0.1711	47.8167	6.8736	499.961	0.00913242
	G.mar.56_FR.ATLN_TW163	G.mar.63_FR.CONN_TW162	48.2297	-0.2422	47.8167	6.8736	530.668	0.0136986
	G.mar.57_FR.ATLN_TW164	G.mar.63_FR.CONN_TW162	47.2611	0.3256	47.8167	6.8736	494.939	0.0152207
	G.mar.58_FR.CONN_ZFMK100410157	G.mar.63_FR.CONN_TW162	47.8123	7.0651	47.8167	6.8736	14.2989	0.00152207
	G.mar.59_FR.CONN_ZFMK18996	G.mar.63_FR.CONN_TW162	49.4611	6.36444	47.8167	6.8736	186.52	0.00152207
	G.mar.60_FR.CONN_ZFMK2517315	G.mar.63_FR.CONN_TW162	47.8591	6.4036	47.8167	6.8736	35.3727	0.00306748
	G.mar.61_FR.CONN_ZFMK2517322	G.mar.63_FR.CONN_TW162	47.8387	6.6671	47.8167	6.8736	15.5987	0.00152207
	G.mar.62_FR.CONN_TW161	G.mar.63_FR.CONN_TW162	47.8387	6.6671	47.8167	6.8736	15.5987	0.00304414
	G.mar.01_DE.MGSO_GBOL33714	G.mar.64_FR.CONS_ZFMK2517209	51.7429	10.7672	45.2346	1.54536	990.662	0.0319635
	G.mar.02_DE.MGSO_ZFMK100409275	G.mar.64_FR.CONS_ZFMK2517209	51.7435	10.7673	45.2346	1.54536	990.713	0.0304414
	G.mar.03_DE.MGSO_ZFMK1634	G.mar.64_FR.CONS_ZFMK2517209	51.841	10.326	45.2346	1.54536	976.556	0.0304414
	G.mar.04_DE.MGSO_ZFMK1909	G.mar.64_FR.CONS_ZFMK2517209	50.8953	11.7527	45.2346	1.54536	983.497	0.0304414
	G.mar.05_DE.MGSO_ZFMK19531	G.mar.64_FR.CONS_ZFMK2517209	50.8953	11.7527	45.2346	1.54536	983.497	0.0304414
	G.mar.06_DE.MGSO_ZFMK2503693	G.mar.64_FR.CONS_ZFMK2517209	50.9194	11.5479	45.2346	1.54536	973.495	0.0304414
	G.mar.07_DE.MGSO_ZFMK2503694	G.mar.64_FR.CONS_ZFMK2517209	50.9194	11.5479	45.2346	1.54536	973.495	0.0304414
	G.mar.08_DE.MGSO_ZFMK2542470	G.mar.64_FR.CONS_ZFMK2517209	50.892	11.8209	45.2346	1.54536	987.166	0.0304414
	G.mar.09_DE.MGSO_ZFMK2542471	G.mar.64_FR.CONS_ZFMK2517209	50.892	11.8209	45.2346	1.54536	987.166	0.0319635
	G.mar.10_DE.MGSO_ZFMK2542541	G.mar.64_FR.CONS_ZFMK2517209	51.133	11.7487	45.2346	1.54536	998.952	0.0304414
	G.mar.11_DE.MGSO_ZFMK2542542	G.mar.64_FR.CONS_ZFMK2517209	51.133	11.7487	45.2346	1.54536	998.952	0.0304414
	G.mar.12_DE.MGSW_ZFMK18967	G.mar.64_FR.CONS_ZFMK2517209	50.6627	7.1026	45.2346	1.54536	730.935	0.0304414
	G.mar.13_DE.MGSW_ZFMK18987	G.mar.64_FR.CONS_ZFMK2517209	50.6659	7.2156	45.2346	1.54536	735.99	0.0304414
	G.mar.14_DE.MGSW_ZFMK18988	G.mar.64_FR.CONS_ZFMK2517209	50.6867	7.2997	45.2346	1.54536	741.415	0.0319635
	G.mar.15_DE.MGSW_ZFMK18991	G.mar.64_FR.CONS_ZFMK2517209	50.7667	7.3667	45.2346	1.54536	751.34	0.0319635
	G.mar.16_DE.MGSW_ZFMK19003	G.mar.64_FR.CONS_ZFMK2517209	51.361	7.5499	45.2346	1.54536	812.115	0.0319635
	G.mar.17_DE.MGSW_ZFMK19005	G.mar.64_FR.CONS_ZFMK2517209	51.361	7.5499	45.2346	1.54536	812.115	0.0289193
	G.mar.18_DE.MGSW_ZFMK19029	G.mar.64_FR.CONS_ZFMK2517209	50.56	6.8078	45.2346	1.54536	709.478	0.0106545
	G.mar.19_DE.MGSW_ZFMK19031	G.mar.64_FR.CONS_ZFMK2517209	51.2299	7.054	45.2346	1.54536	780.599	0.0182648
	G.mar.20_DE.MGSW_ZFMK19044	G.mar.64_FR.CONS_ZFMK2517209	50.8026	7.2418	45.2346	1.54536	749.255	0.0319635
	G.mar.21_DE.MGSW_ZFMK19045	G.mar.64_FR.CONS_ZFMK2517209	51.3589	7.1697	45.2346	1.54536	796.989	0.0304414
	G.mar.22_DE.MGSW_ZFMK19046	G.mar.64_FR.CONS_ZFMK2517209	51.2299	7.054	45.2346	1.54536	780.599	0.0304414
	G.mar.23_DE.MGSW_ZFMK19047	G.mar.64_FR.CONS_ZFMK2517209	50.714	7.1772	45.2346	1.54536	738.643	0.0319635
	G.mar.24_DE.MGSW_ZFMK19048	G.mar.64_FR.CONS_ZFMK2517209	50.6715	7.0469	45.2346	1.54536	729.396	0.0289193
	G.mar.25_DE.MGSW_ZFMK19049	G.mar.64_FR.CONS_ZFMK2517209	51.291	7.2522	45.2346	1.54536	793.923	0.0304414
	G.mar.26_DE.MGSW_ZFMK19051	G.mar.64_FR.CONS_ZFMK2517209	50.5511	7.1722	45.2346	1.54536	723.986	0.0106545
	G.mar.27_DE.MGSW_ZFMK19054	G.mar.64_FR.CONS_ZFMK2517209	50.4647	7.2225	45.2346	1.54536	718.586	0.0106545
	G.mar.28_DE.MGSW_ZFMK19057	G.mar.64_FR.CONS_ZFMK2517209	51.361	7.5499	45.2346	1.54536	812.115	0.0304414
	G.mar.29_DE.MGSW_ZFMK19539	G.mar.64_FR.CONS_ZFMK2517209	50.6319	6.4731	45.2346	1.54536	702.727	0.0121766
	G.mar.30_DE.MGSW_ZFMK19550	G.mar.64_FR.CONS_ZFMK2517209	50.7797	8.0085	45.2346	1.54536	780.777	0.0304414
	G.mar.31_DE.MGSW_ZFMK19555	G.mar.64_FR.CONS_ZFMK2517209	50.7797	8.0085	45.2346	1.54536	780.777	0.0197869
	G.mar.32_DE.MGSW_ZFMK19558	G.mar.64_FR.CONS_ZFMK2517209	50.7093	7.7132	45.2346	1.54536	761.46	0.0319635
	G.mar.33_DE.MGSW_ZFMK19560	G.mar.64_FR.CONS_ZFMK2517209	50.7093	7.7132	45.2346	1.54536	761.46	0.0304414
	G.mar.34_DE.MGSW_ZFMK19561	G.mar.64_FR.CONS_ZFMK2517209	50.7093	7.7132	45.2346	1.54536	761.46	0.0304414
	G.mar.35_DE.MGSW_ZFMK2516208	G.mar.64_FR.CONS_ZFMK2517209	50.6245	7.1936	45.2346	1.54536	731.387	0.0319635
	G.mar.36_DE.MGSW_ZFMK2516209	G.mar.64_FR.CONS_ZFMK2517209	50.6245	7.1936	45.2346	1.54536	731.387	0.0319635
	G.mar.37_DE.MGSW_ZFMK2557907	G.mar.64_FR.CONS_ZFMK2517209	51.1821	10.2208	45.2346	1.54536	920.532	0.0304414
	G.mar.38_DE.MGSW_ZFMK2557908	G.mar.64_FR.CONS_ZFMK2517209	51.1821	10.2208	45.2346	1.54536	920.532	0.0304414
	G.mar.39_DE.NDTO_ZFMK100409283	G.mar.64_FR.CONS_ZFMK2517209	53.9192	10.0977	45.2346	1.54536	1143.24	0.0304414
	G.mar.40_DE.NDTO_ZFMK2538190	G.mar.64_FR.CONS_ZFMK2517209	54.303	10.756	45.2346	1.54536	1203.01	0.0274809
	G.mar.41_DE.NDTO_ZFMK2538253	G.mar.64_FR.CONS_ZFMK2517209	53.124	13.884	45.2346	1.54536	1250.53	0.0228659
	G.mar.42_DE.NDTO_ZFMK2553394	G.mar.64_FR.CONS_ZFMK2517209	53.6525	11.4369	45.2346	1.54536	1174.91	0.0304414
	G.mar.43_DE.NDTO_ZFMK2553395	G.mar.64_FR.CONS_ZFMK2517209	53.6525	11.4369	45.2346	1.54536	1174.91	0.0304414
	G.mar.44_DE.NDTO_ZFMK2553405	G.mar.64_FR.CONS_ZFMK2517209	53.2794	12.0768	45.2346	1.54536	1173.39	0.0304414
	G.mar.45_DE.NDTW_ZFMK100409272	G.mar.64_FR.CONS_ZFMK2517209	52.9604	9.8927	45.2346	1.54536	1050.14	0.0289193
	G.mar.46_DE.NDTW_ZFMK19472	G.mar.64_FR.CONS_ZFMK2517209	51.4423	7.2665	45.2346	1.54536	808.422	0.0106707
[truncated: 2,657 more rows]

## Sheet: Caption
Table. Estimates of Evolutionary Divergence between Sequences
The number of base differences per site from between sequences are shown. The analysis involved 97 nucleotide sequences. Codon positions included were 1st+2nd+3rd+Noncoding. All ambiguous positions were removed for each sequence pair. There were a total of 657 positions in the final dataset. Evolutionary analyses were conducted in MEGA7 [1].
1. Kumar S., Stecher G., and Tamura K. (2015). MEGA7: Molecular Evolutionary Genetics Analysis version 7.0 for bigger datasets.Molecular Biology and Evolution (submitted).
Disclaimer: Although utmost care has been taken to ensure the correctness of the caption, the caption text is provided "as is" without any warranty of any kind. Authors advise the user to carefully check the caption prior to its use for any purpose and report any errors or problems to the authors immediately (www.megasoftware.net). In no event shall the authors and their employers be liable for a…
